# Supplementary material for: Focal adhesion protein Kindlin-2 regulates bone homeostasis in mice
Source: PubMed Central journal article supplement (PMC6946678; doi:10.1038/s41413-019-0073-8), 2020-01-02
Supplement: 41413_2019_73_MOESM1_ESM.pdf [file 41413_2019_73_MOESM1_ESM.pdf]

Figure S1

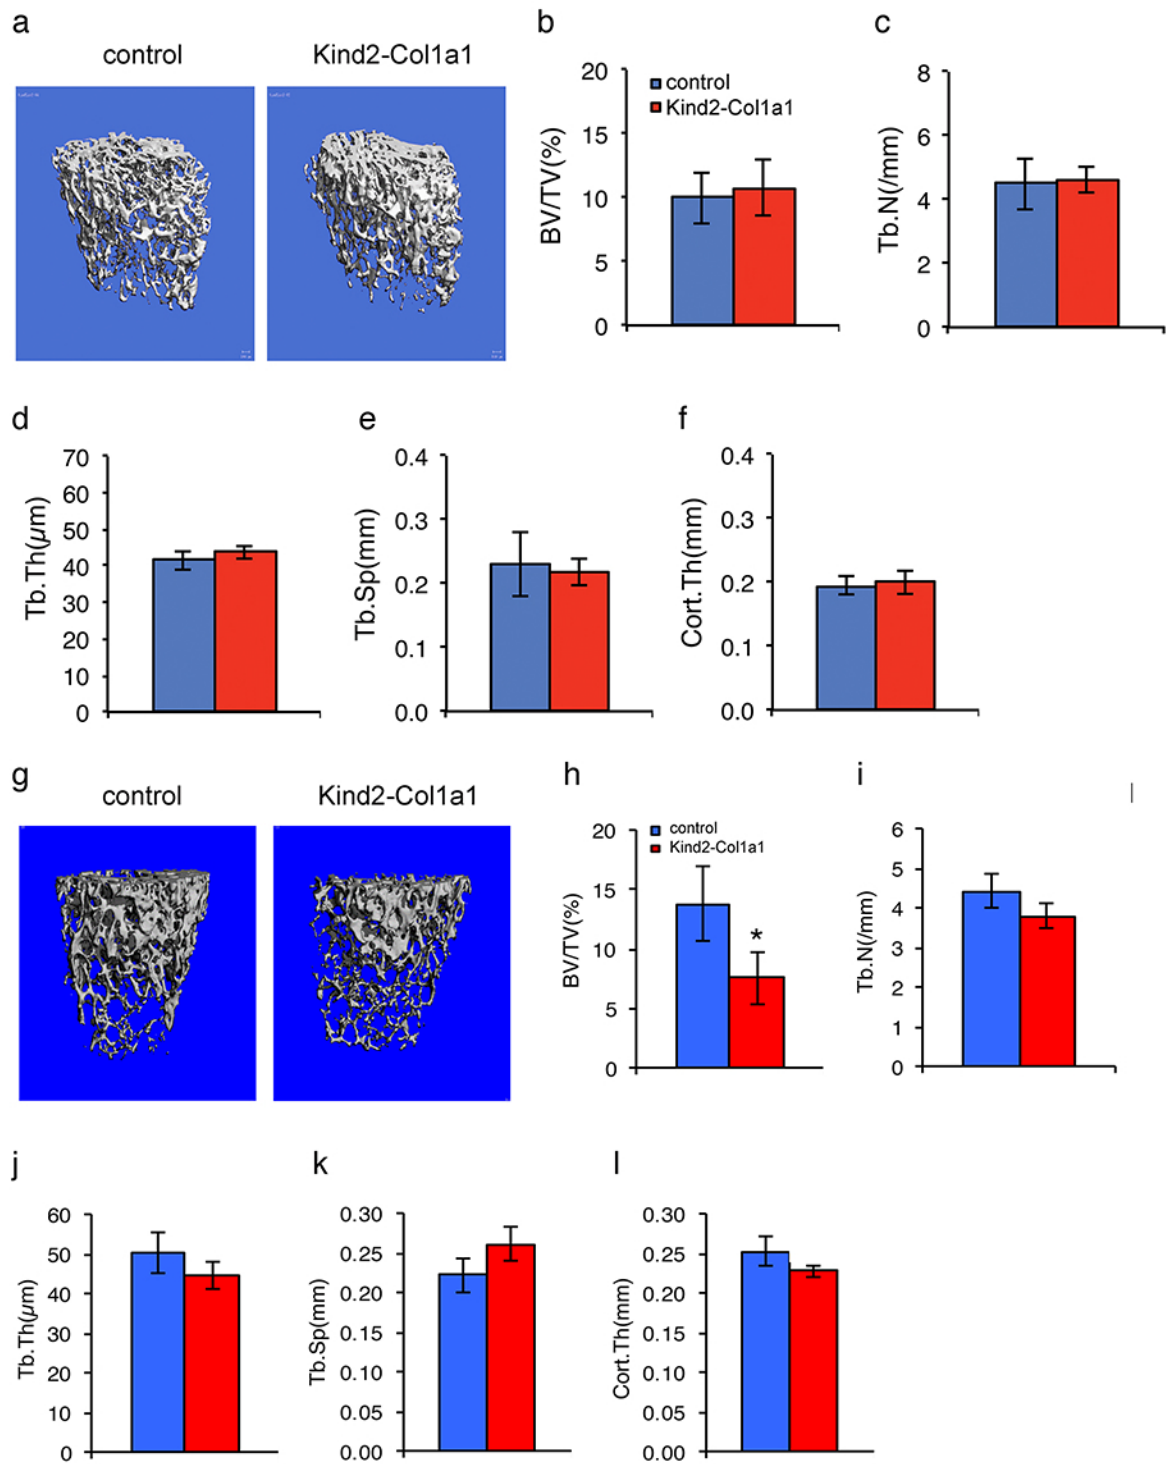

Figure S2

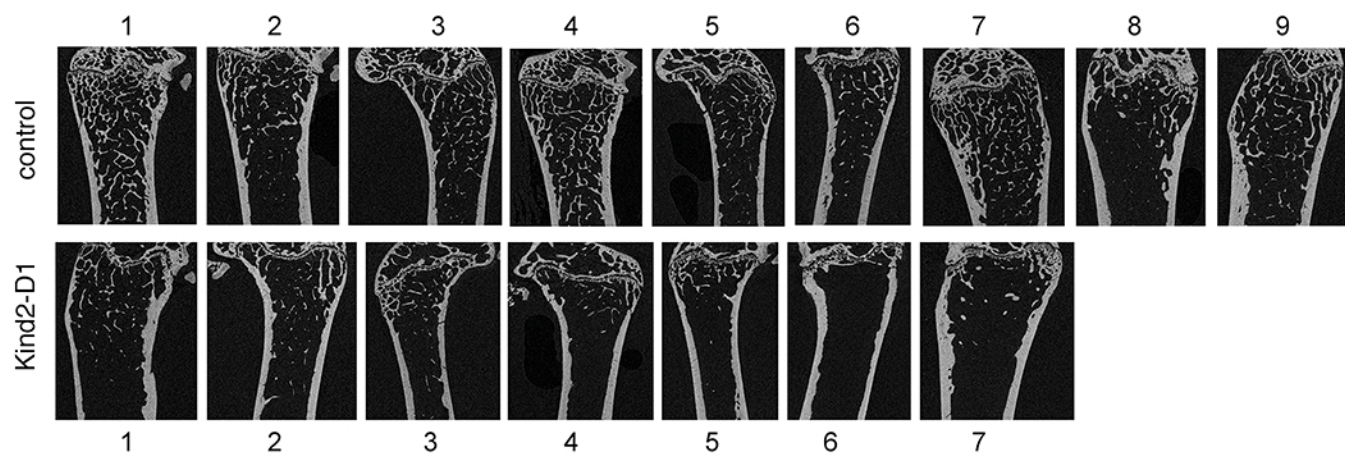

Figure S3

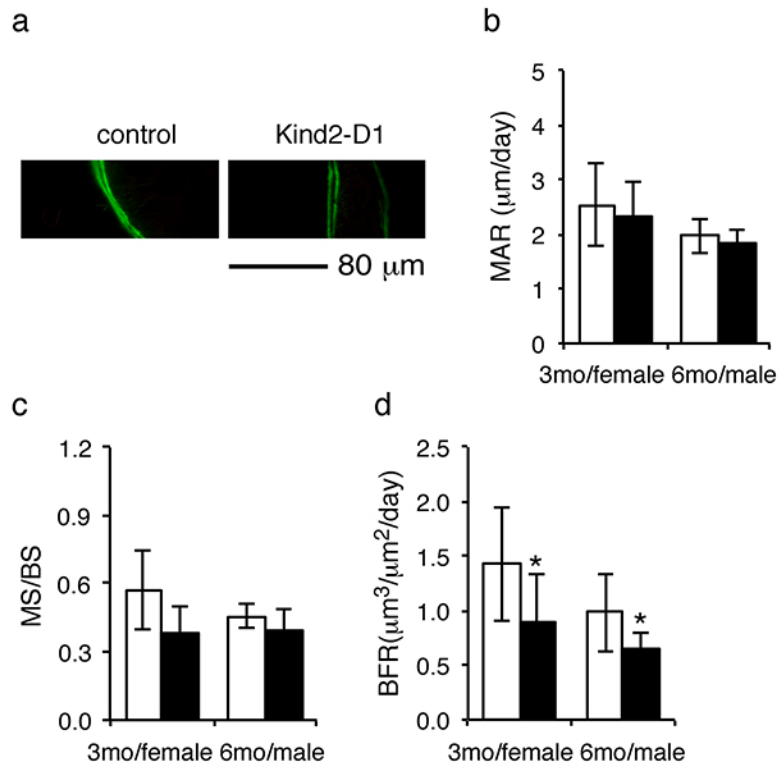

Figure S4

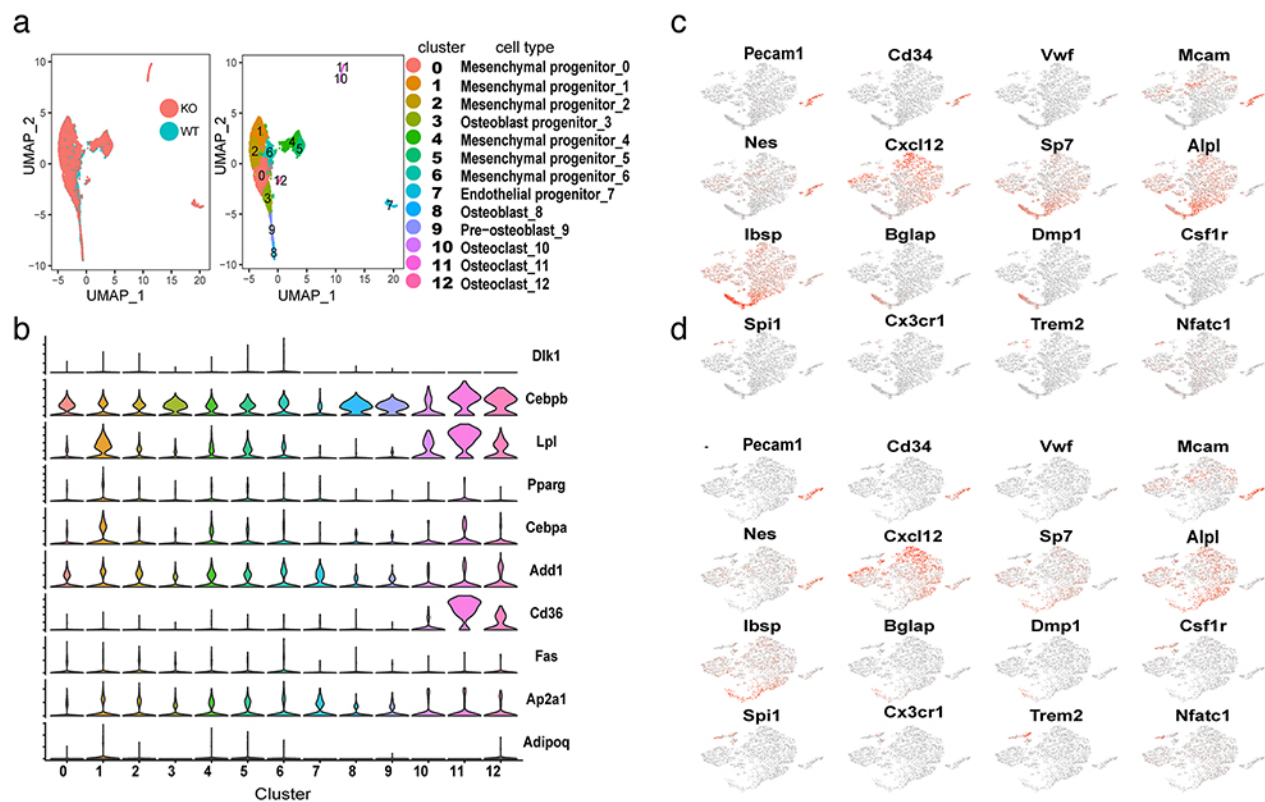

Figure S5

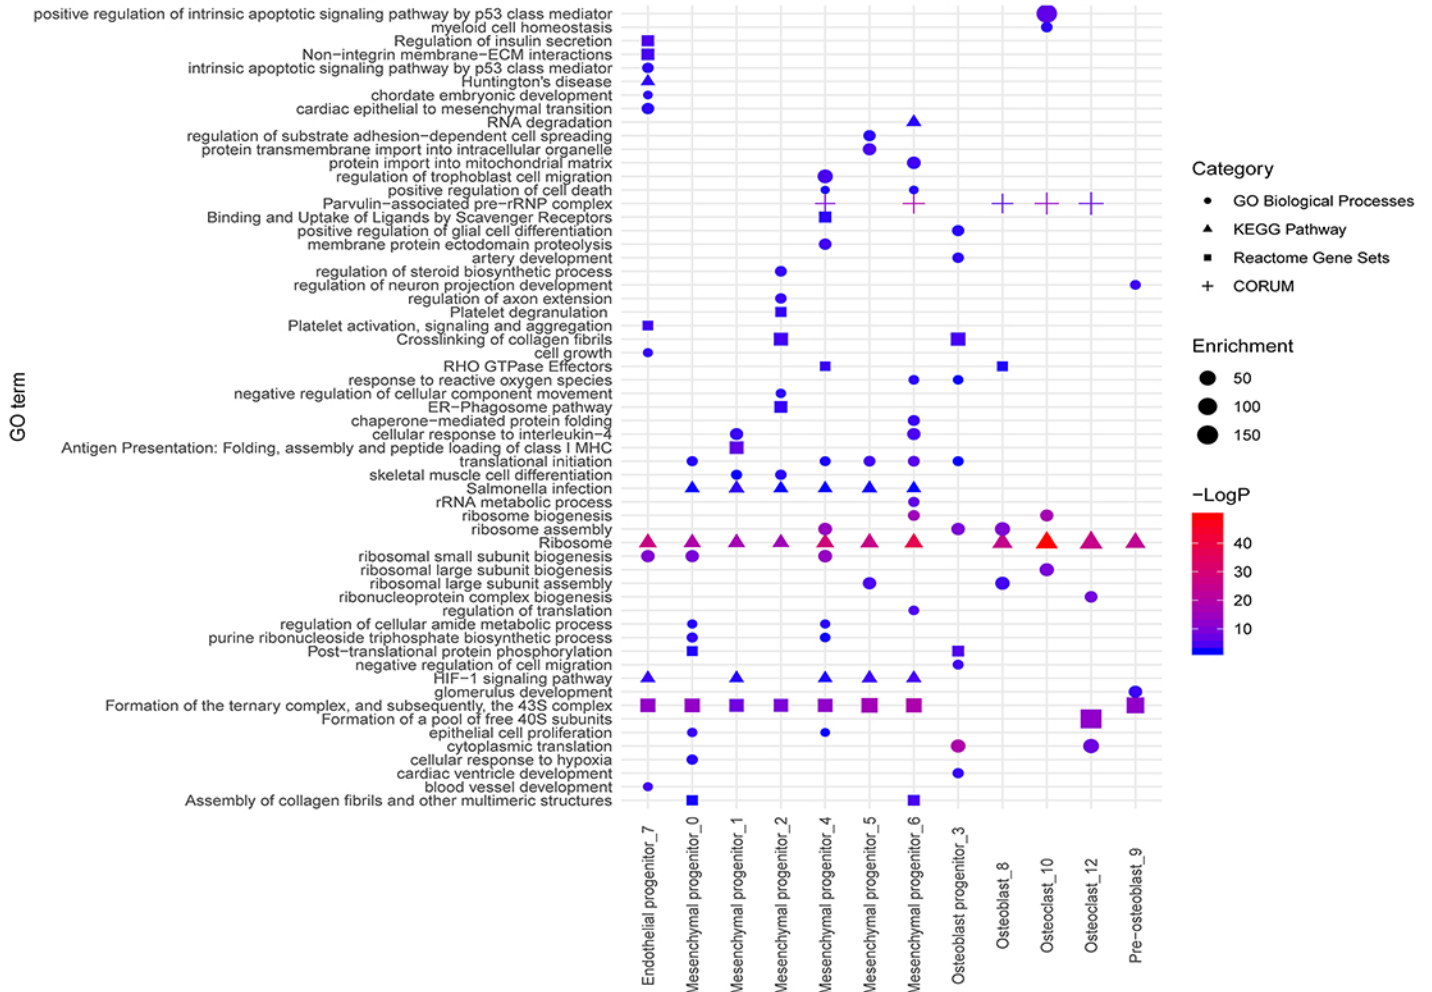

Figure S6

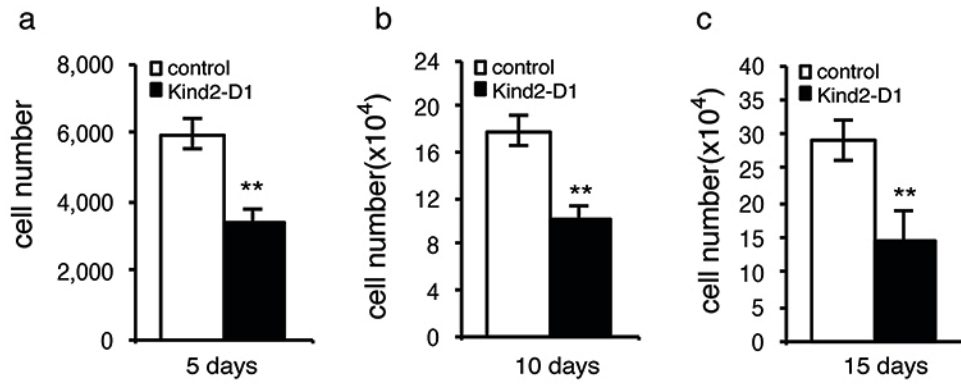

Figure S7

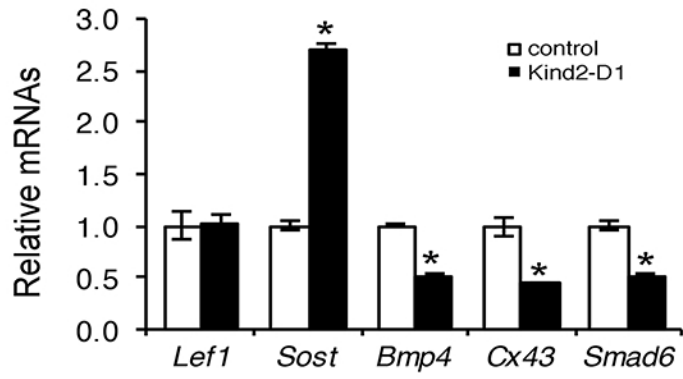

Figure S8

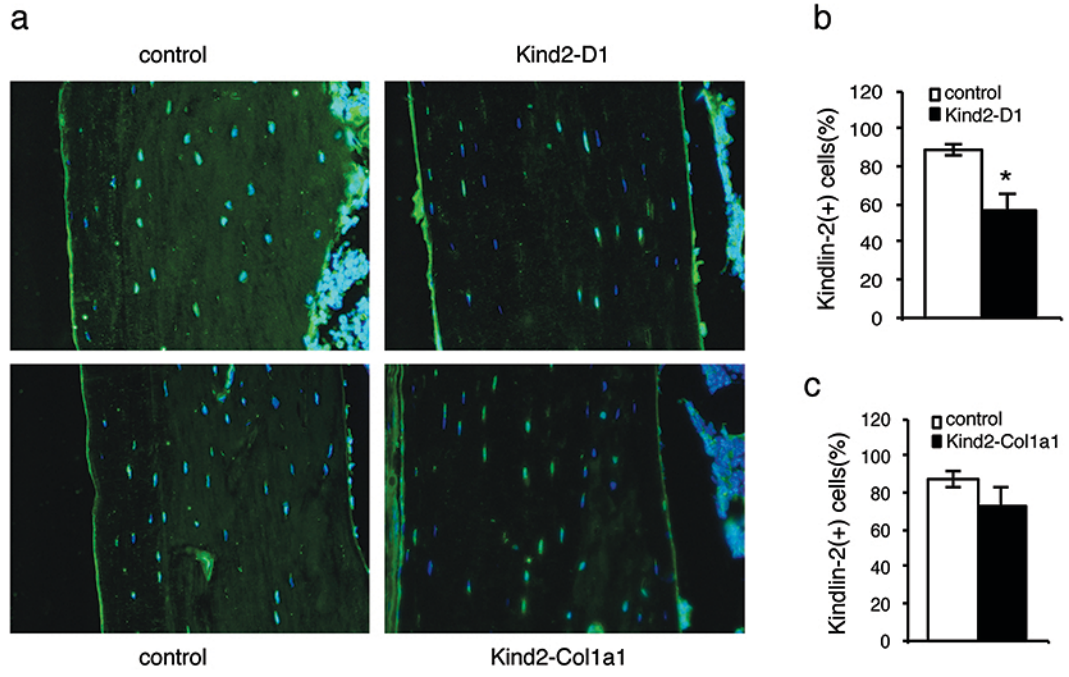



Figure S9

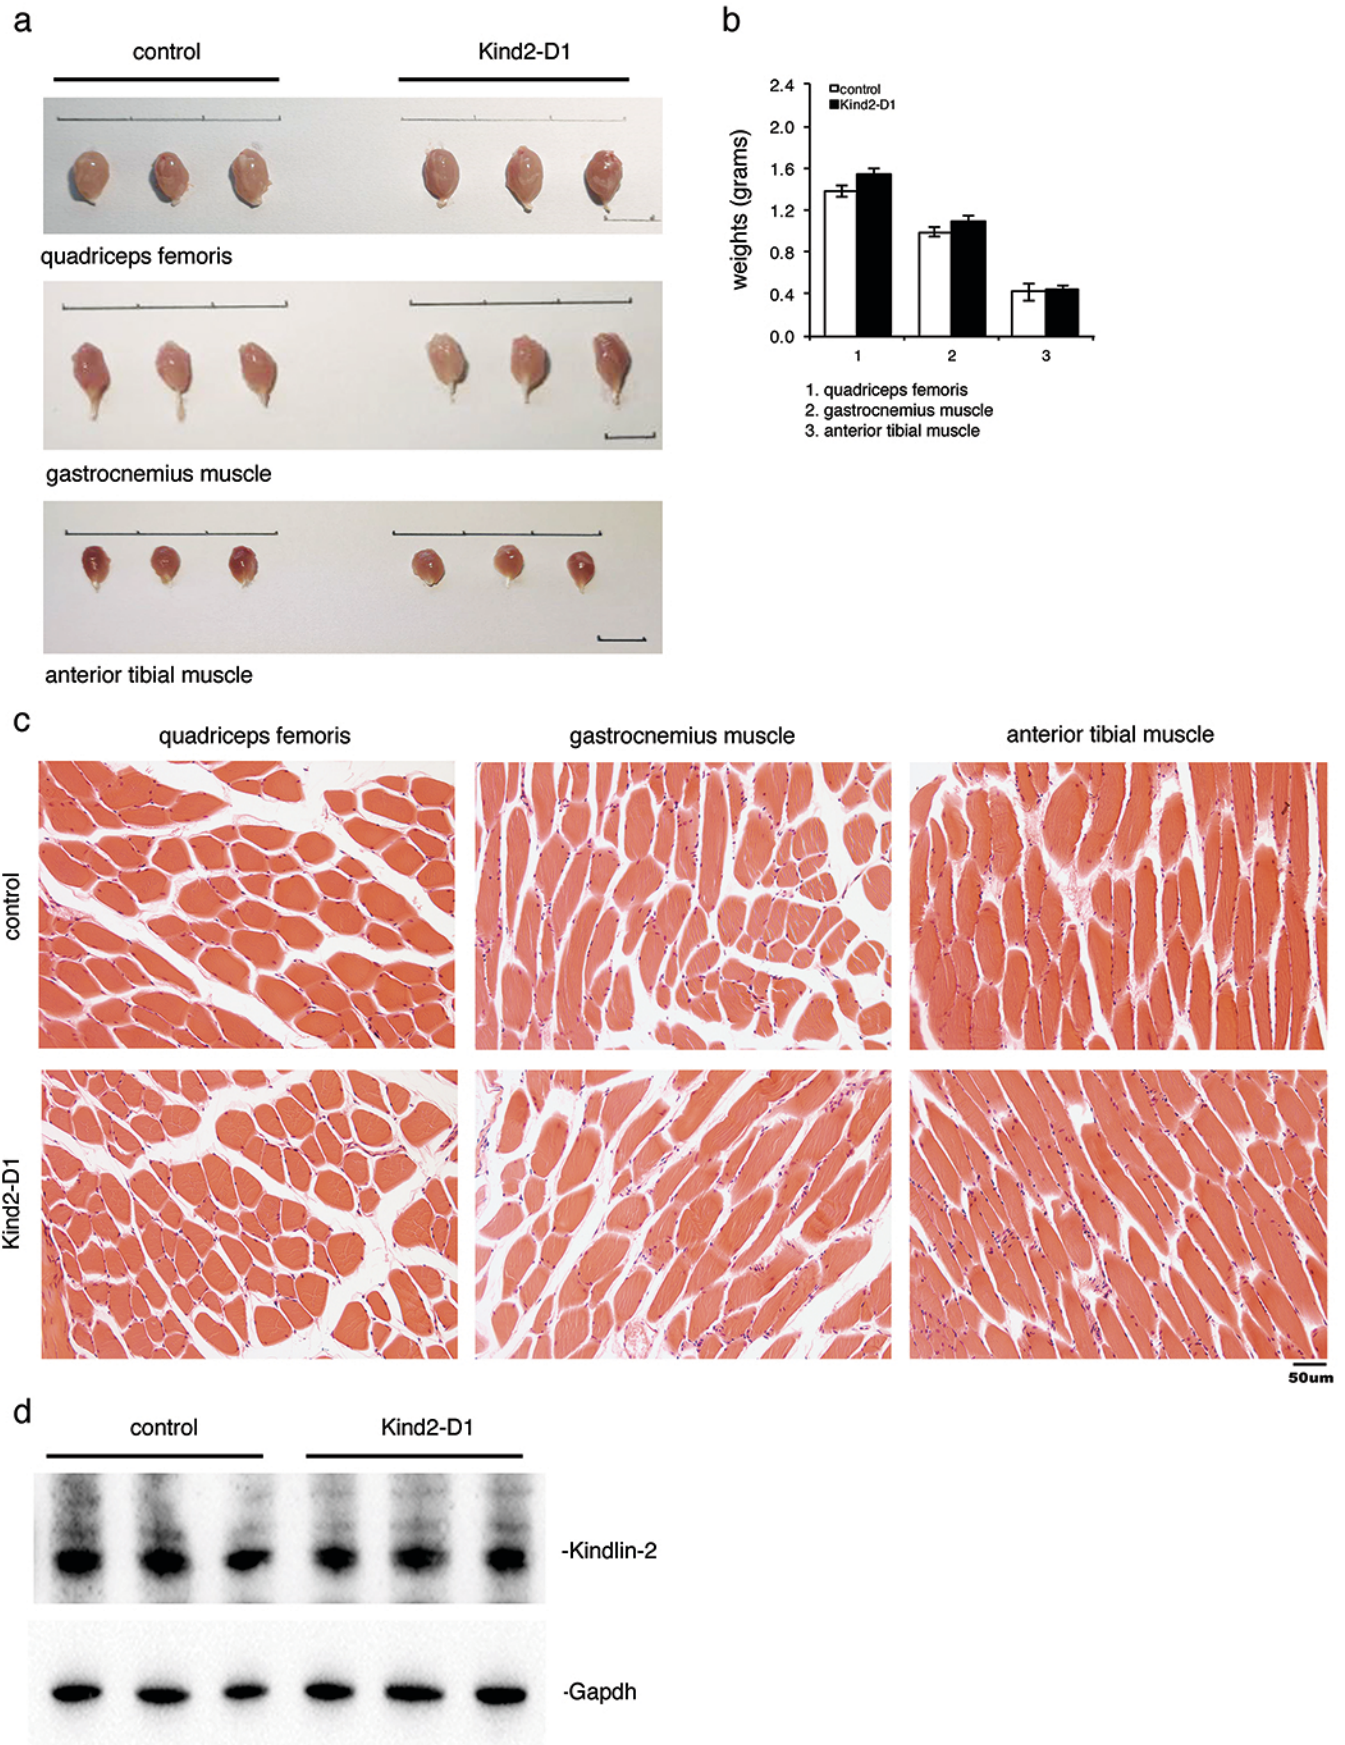

## SUPPLEMENTAL INFORMATION

### **Supplementary Figure 1. Deleting Kindlin-2 expression in osteoblasts using the 2.3-kb mouse *Col1a1-Cre* transgenic mice slightly reduces bone mass in 4-, but not 2-, month-old mice.**

(a) Three-dimensional (3D) reconstruction from microcomputed tomography ( $\mu$ CT) scans of femurs from 2-month-old *Kind2-Col1a1* and control male mice. (b-f) Quantitative analysis of BV/TV, Tb.Th, Tb.N, Tb.Sp, and Cort.Th.  $N = 4$  mice per group. (g) 3D reconstruction from  $\mu$ CT scans of femurs from 4-month-old *Kind2-Col1a1* and control male mice. (h-j) Quantitative analysis of BV/TV, Tb.Th, Tb.N, Tb.Sp, and Cort.Th.  $N = 4$  mice per group.

### **Supplementary Figure 2. Kindlin-2 ablation dramatically reduces bone mass in 6-month-old male mice.**

Two-dimensional (2D) reconstruction from microcomputed tomography ( $\mu$ CT) scans of femurs from 6-mo-old male *Kind2-D1* mice and control littermates.  $N = 9$  for control,  $N = 7$  for *Kind2-D1* mice.

### **Supplementary Figure 3. Effects of Kindlin-2 loss on MAR, MS/BS and BFR in diaphyseal cortical bones.**

(a) Calcein double labeling. Sections of non-demineralized femurs of 6-mo-old control and *Kind2-D1* male mice were used for MAR, MS/BS, and BFR assays. (b-d) Quantitative MAR, MS/BS, and BFR data for diaphyseal cortical bones. Scale bar, 80  $\mu$ m.  $N = 11$  control,  $N = 10$  for *Kind2-D1*.

### **Supplementary Figure 4. Four major cell types are identified with specific markers.**

(a) Data visualization using UMAP. (b) Vlnplot with markers of adipocytes. Important

adipocyte-related markers, including *Dlk1*, *Pparg*, and *Adipoq*, were not significantly expressed in any clusters. (c) TSNEPlot with indicated markers in control group cells. (d) TSNEPlot with indicated markers in *Kind2-D1* group cells.

**Supplementary Figure 5. Gene set enrichment analysis results using metascape with *P* value lower than 1E-4.** Genes with adjusted *P* value lower than 0.01 and absolute log<sub>2</sub> fold change higher than 0.25 were used as input gene set for enrichment analysis by metascape with default parameters.

**Supplementary Figure 6. Reduced growth rate of CFU-F cultures from Kind2-D1 mice. (a-c)** Bone marrow nucleated cells ( $4 \times 10^5$  cells) from 2-mo-old male *Kind2-D1* mice and control littermates were seeded in 24-well plates and cultured in media from the CFU-F assay kit. At d5 (a), d10 (b), and d15 (c), adhering cells were digested by trypsin and counted. N = 3 mice per group. \**P* < 0.05, versus controls, Student's *t*-test. Results are expressed as mean  $\pm$  standard deviation (s.d.).

**Supplementary Figure 7. Effects of Kindlin-2 loss on expression of sclerostin and Wnt/ $\beta$ -catenin downstream target genes in bones.** Real-time RT-PCR (qPCR) analyses. Tibiae were harvested from 2-mo-old male *Kind2-D1* mice and control littermates, growth plates at both ends were cut, and the bone marrow was flushed. Total RNA was isolated and used for qPCR analysis for expression of indicated genes and normalized to *Gapdh* mRNA. \**P* < 0.05, versus controls, Student's *t*-test. Results are expressed as mean  $\pm$  standard deviation.

**Supplementary Figure 8. Kindlin-2 expression in osteocytes in Kind2-D1 and Kind2-Col1a1 mice.** (a-c) Immunofluorescence (IF) staining of tibial sections of 4-mo-old male Kind2-D1, Kind2-Col1a1 and their respective control littermates with an anti-Kindlin-2 antibody. Quantitative data of Kindlin-2-positive osteocytes embedded in the cortical bone matrix (b,c). N = 4 mice for Kind2-D1 and control, N = 5 mice for Kind2-Col1a1 and control. \* $P < 0.05$ , versus controls, Student's t-test. Results are expressed as mean  $\pm$  s.d.

**Supplementary Figure 9. Skeletal muscles are not markedly affected in Kind2-D1 mice.** (a,b) Muscle weight. The weights of the quadriceps femoris, gastrocnemius muscle, and anterior tibial muscle from 5-mo-old Kind2-D1 male mice and sex-matched control littermates were measured. N = 3 mice per group. Results are expressed as mean  $\pm$  standard deviation (s.d.). (c) Hematoxylin and eosin (H/E) staining. Sections of above muscles were subjected to H/E staining. Scale bar: 50  $\mu$ m. (d) Western blotting. Protein extracts from above quadriceps femoris were subjected to western blotting analysis using an anti-Kindlin-2 antibody. Gapdh protein was used as a loading control.

## Supplementary Table 1

### Differentially expressed genes between control group and Kind2-D1 group with adjusted *P* value lower than 0.01

# *P* value calculated by FindMarkers Function with default wilcoxon sign test in Seurat (version 2.3.4)

# pct.1, pct.2 represented percentage of cells with expression higher than 0

# *P* value adjusted using bonferroni method

| gene    | p value       | avg_logFC        | pct.1     | pct.2     | adjusted p value | cluster | cell type                |
|---------|---------------|------------------|-----------|-----------|------------------|---------|--------------------------|
| Rps28   | 8.67E-20<br>0 | -0.9351955<br>74 | 1         | 0.99<br>8 | 1.26E-195        | 0       | Mesenchymal progenitor_0 |
| Rps29   | 1.02E-18<br>0 | -0.6478229<br>36 | 1         | 1         | 1.49E-176        | 0       | Mesenchymal progenitor_0 |
| Rpl38   | 2.08E-16<br>0 | -0.6518185<br>34 | 1         | 1         | 3.02E-156        | 0       | Mesenchymal progenitor_0 |
| Rpl41   | 5.62E-14<br>0 | -0.4531269<br>06 | 1         | 1         | 8.19E-136        | 0       | Mesenchymal progenitor_0 |
| Gm8730  | 5.53E-13<br>6 | 0.74693076       | 1         | 0.98<br>8 | 8.06E-132        | 0       | Mesenchymal progenitor_0 |
| Rps2    | 3.10E-11<br>7 | 0.54289669<br>6  | 0.99<br>9 | 0.99      | 4.52E-113        | 0       | Mesenchymal progenitor_0 |
| Gm26917 | 9.81E-11<br>0 | 0.75049400<br>2  | 0.96<br>1 | 0.75<br>5 | 1.43E-105        | 0       | Mesenchymal progenitor_0 |
| Rps27   | 1.16E-10<br>5 | -0.4212166<br>68 | 1         | 1         | 1.69E-101        | 0       | Mesenchymal progenitor_0 |
| Gm10076 | 3.56E-88      | -0.3814446<br>46 | 1         | 0.99<br>8 | 5.19E-84         | 0       | Mesenchymal progenitor_0 |
| Rpl15   | 1.11E-86      | 0.54236439<br>9  | 0.99<br>4 | 0.94<br>5 | 1.62E-82         | 0       | Mesenchymal progenitor_0 |
| Rpl36   | 3.83E-86      | -0.3926952<br>95 | 0.99<br>9 | 0.99<br>7 | 5.58E-82         | 0       | Mesenchymal progenitor_0 |
| Rpl37a  | 4.88E-78      | -0.3059130<br>84 | 1         | 1         | 7.10E-74         | 0       | Mesenchymal progenitor_0 |
| mt-Nd2  | 1.95E-76      | -0.7170271<br>06 | 0.77<br>2 | 0.92<br>6 | 2.84E-72         | 0       | Mesenchymal progenitor_0 |
| Eif2s2  | 7.41E-75      | -0.5816708<br>75 | 0.93<br>1 | 0.98<br>3 | 1.08E-70         | 0       | Mesenchymal progenitor_0 |
| Atp5k   | 1.11E-74      | -0.6420809<br>73 | 0.87<br>3 | 0.96<br>2 | 1.62E-70         | 0       | Mesenchymal progenitor_0 |
| Rplp0   | 5.17E-70      | 0.41708735<br>5  | 1         | 0.99      | 7.52E-66         | 0       | Mesenchymal progenitor_0 |
| Nmt1    | 4.06E-68      | -0.7276679<br>96 | 0.29      | 0.67<br>5 | 5.92E-64         | 0       | Mesenchymal progenitor_0 |
| Nme2    | 8.06E-59      | 0.65175347<br>9  | 0.76<br>8 | 0.41<br>1 | 1.17E-54         | 0       | Mesenchymal progenitor_0 |
| Rpl37   | 8.66E-58      | -0.2769069<br>21 | 0.99<br>9 | 1         | 1.26E-53         | 0       | Mesenchymal progenitor_0 |

|         |          |                  |           |           |          |   |                             |
|---------|----------|------------------|-----------|-----------|----------|---|-----------------------------|
| Snhg9   | 1.10E-56 | -0.6680902<br>14 | 0.09<br>5 | 0.44<br>9 | 1.61E-52 | 0 | Mesenchymal<br>progenitor_0 |
| Rps21   | 4.66E-52 | -0.3395922<br>62 | 0.99<br>4 | 0.99<br>3 | 6.78E-48 | 0 | Mesenchymal<br>progenitor_0 |
| Ftl1    | 4.43E-51 | 0.33071666<br>9  | 1         | 1         | 6.46E-47 | 0 | Mesenchymal<br>progenitor_0 |
| Gm10260 | 1.52E-49 | 0.3206545        | 0.99<br>8 | 0.99      | 2.21E-45 | 0 | Mesenchymal<br>progenitor_0 |
| Rps18   | 1.43E-47 | 0.29155374<br>7  | 1         | 0.99<br>1 | 2.09E-43 | 0 | Mesenchymal<br>progenitor_0 |
| Sertad2 | 8.56E-47 | -0.6715708<br>54 | 0.42<br>9 | 0.71      | 1.25E-42 | 0 | Mesenchymal<br>progenitor_0 |
| Malat1  | 2.37E-46 | -0.4792632<br>75 | 1         | 1         | 3.45E-42 | 0 | Mesenchymal<br>progenitor_0 |
| Rpl29   | 6.11E-46 | 0.48843739<br>5  | 0.88<br>5 | 0.65<br>3 | 8.89E-42 | 0 | Mesenchymal<br>progenitor_0 |
| Sec61g  | 7.14E-44 | -0.3054129<br>01 | 0.99<br>6 | 0.99<br>1 | 1.04E-39 | 0 | Mesenchymal<br>progenitor_0 |
| Lmo4    | 7.41E-42 | -0.6325625<br>51 | 0.55<br>4 | 0.74<br>8 | 1.08E-37 | 0 | Mesenchymal<br>progenitor_0 |
| Rpl39   | 7.73E-40 | -0.3484350<br>48 | 0.99<br>8 | 0.99<br>8 | 1.13E-35 | 0 | Mesenchymal<br>progenitor_0 |
| Ndufa3  | 1.71E-37 | -0.4617808<br>16 | 0.85<br>1 | 0.91<br>9 | 2.49E-33 | 0 | Mesenchymal<br>progenitor_0 |
| Gm10263 | 7.84E-36 | -0.4598437<br>28 | 0.04<br>8 | 0.28<br>3 | 1.14E-31 | 0 | Mesenchymal<br>progenitor_0 |
| Rps7    | 1.04E-35 | 0.27590445<br>1  | 1         | 0.98<br>6 | 1.52E-31 | 0 | Mesenchymal<br>progenitor_0 |
| Rpl10   | 2.23E-33 | 0.26287824<br>9  | 0.99<br>9 | 0.99      | 3.25E-29 | 0 | Mesenchymal<br>progenitor_0 |
| Gm10709 | 6.06E-32 | 0.31671197       | 0.97<br>5 | 0.92<br>2 | 8.83E-28 | 0 | Mesenchymal<br>progenitor_0 |
| Calr    | 7.71E-31 | 0.39218975<br>3  | 0.94<br>9 | 0.86<br>2 | 1.12E-26 | 0 | Mesenchymal<br>progenitor_0 |
| Rps27rt | 2.81E-29 | -0.4850968<br>25 | 0.38<br>1 | 0.61<br>5 | 4.10E-25 | 0 | Mesenchymal<br>progenitor_0 |
| Timp1   | 3.41E-29 | 0.46889641       | 0.95<br>6 | 0.91<br>7 | 4.96E-25 | 0 | Mesenchymal<br>progenitor_0 |
| Igkc    | 6.91E-29 | 0.40868051<br>5  | 0.40<br>1 | 0.12<br>8 | 1.01E-24 | 0 | Mesenchymal<br>progenitor_0 |
| Usmg5   | 1.66E-28 | -0.3768408<br>57 | 0.81<br>6 | 0.89<br>8 | 2.42E-24 | 0 | Mesenchymal<br>progenitor_0 |
| Ibsp    | 2.13E-28 | 0.28449496<br>2  | 0.85<br>7 | 0.51<br>3 | 3.10E-24 | 0 | Mesenchymal<br>progenitor_0 |
| Gm10020 | 3.68E-28 | 0.40138210<br>7  | 0.65<br>1 | 0.36<br>3 | 5.36E-24 | 0 | Mesenchymal<br>progenitor_0 |
| Ybx1    | 7.08E-28 | 0.30628551<br>1  | 0.97<br>4 | 0.95<br>2 | 1.03E-23 | 0 | Mesenchymal<br>progenitor_0 |

|                |          |            |      |      |          |   |                          |
|----------------|----------|------------|------|------|----------|---|--------------------------|
| Lox            | 6.06E-27 | 0.40887185 | 0.98 | 0.93 | 8.83E-23 | 0 | Mesenchymal progenitor_0 |
| Fos            | 5.14E-26 | -0.6141939 | 0.57 | 0.73 | 7.48E-22 | 0 | Mesenchymal progenitor_0 |
| Hes1           | 1.93E-24 | -0.5906809 | 0.45 | 0.64 | 2.81E-20 | 0 | Mesenchymal progenitor_0 |
| Ogn            | 2.26E-24 | -0.4486425 | 0.72 | 0.84 | 3.30E-20 | 0 | Mesenchymal progenitor_0 |
| Myeov2         | 1.27E-23 | -0.3119616 | 0.92 | 0.95 | 1.84E-19 | 0 | Mesenchymal progenitor_0 |
| 2010107E04 Rik | 2.22E-23 | -0.3679543 | 0.67 | 0.80 | 3.23E-19 | 0 | Mesenchymal progenitor_0 |
| Snhg18         | 4.41E-23 | -0.4234347 | 0.61 | 0.75 | 6.42E-19 | 0 | Mesenchymal progenitor_0 |
| Pabpc1         | 9.95E-23 | 0.31557815 | 0.94 | 0.87 | 1.45E-18 | 0 | Mesenchymal progenitor_0 |
| Gm10126        | 2.10E-22 | -0.2592404 | 0.02 | 0.16 | 3.06E-18 | 0 | Mesenchymal progenitor_0 |
| Gm10116        | 2.86E-21 | 0.38408976 | 0.71 | 0.45 | 4.17E-17 | 0 | Mesenchymal progenitor_0 |
| Ppp1r14b       | 3.08E-21 | 0.31397636 | 0.9  | 0.76 | 4.48E-17 | 0 | Mesenchymal progenitor_0 |
| mt-Nd3         | 4.63E-21 | -0.3772111 | 0.22 | 0.43 | 6.75E-17 | 0 | Mesenchymal progenitor_0 |
| Egr1           | 4.21E-20 | -0.4976610 | 0.45 | 0.63 | 6.13E-16 | 0 | Mesenchymal progenitor_0 |
| Nisch          | 1.55E-19 | -0.3736708 | 0.61 | 0.73 | 2.25E-15 | 0 | Mesenchymal progenitor_0 |
| Polr2l         | 7.41E-19 | -0.3520487 | 0.65 | 0.76 | 1.08E-14 | 0 | Mesenchymal progenitor_0 |
| Arpc1b         | 1.95E-18 | 0.27558829 | 0.95 | 0.87 | 2.84E-14 | 0 | Mesenchymal progenitor_0 |
| MyI9           | 3.07E-18 | -0.3771657 | 0.89 | 0.92 | 4.47E-14 | 0 | Mesenchymal progenitor_0 |
| Gm10073        | 1.46E-17 | -0.2831961 | 0.78 | 0.84 | 2.12E-13 | 0 | Mesenchymal progenitor_0 |
| Dstn           | 1.73E-17 | -0.3277708 | 0.88 | 0.90 | 2.52E-13 | 0 | Mesenchymal progenitor_0 |
| Snrpg          | 3.12E-17 | -0.2719775 | 0.86 | 0.89 | 4.54E-13 | 0 | Mesenchymal progenitor_0 |
| Wisp1          | 7.65E-17 | 0.28838353 | 0.87 | 0.73 | 1.11E-12 | 0 | Mesenchymal progenitor_0 |
| Eif4ebp1       | 1.06E-16 | 0.25662540 | 0.96 | 0.87 | 1.54E-12 | 0 | Mesenchymal progenitor_0 |
| Gm8186         | 1.67E-16 | -0.3581448 | 0.29 | 0.47 | 2.43E-12 | 0 | Mesenchymal progenitor_0 |
| Prss23         | 1.88E-16 | 0.37774635 | 0.79 | 0.61 | 2.74E-12 | 0 | Mesenchymal progenitor_0 |

|          |          |                  |           |           |          |   |                             |
|----------|----------|------------------|-----------|-----------|----------|---|-----------------------------|
| Col12a1  | 3.13E-16 | -0.3222961<br>57 | 0.94<br>8 | 0.96<br>2 | 4.57E-12 | 0 | Mesenchymal<br>progenitor_0 |
| Pet100   | 3.87E-16 | -0.3760752<br>88 | 0.34<br>9 | 0.51<br>5 | 5.64E-12 | 0 | Mesenchymal<br>progenitor_0 |
| Fads3    | 1.35E-15 | 0.32583565<br>3  | 0.62<br>5 | 0.43<br>4 | 1.97E-11 | 0 | Mesenchymal<br>progenitor_0 |
| Eif3k    | 1.76E-15 | 0.25071465<br>8  | 0.90<br>4 | 0.81<br>3 | 2.57E-11 | 0 | Mesenchymal<br>progenitor_0 |
| Itm2a    | 2.84E-15 | -0.4735060<br>66 | 0.72<br>1 | 0.80<br>1 | 4.14E-11 | 0 | Mesenchymal<br>progenitor_0 |
| Rpl6l    | 3.51E-15 | 0.28602951<br>7  | 0.53<br>4 | 0.32<br>1 | 5.11E-11 | 0 | Mesenchymal<br>progenitor_0 |
| Psap     | 5.51E-15 | -0.3115784<br>96 | 0.86<br>9 | 0.90<br>3 | 8.02E-11 | 0 | Mesenchymal<br>progenitor_0 |
| Apoe     | 2.68E-14 | -0.2899102<br>08 | 0.10<br>6 | 0.25<br>4 | 3.90E-10 | 0 | Mesenchymal<br>progenitor_0 |
| Tomm7    | 7.55E-14 | -0.2613451<br>1  | 0.78<br>2 | 0.82<br>7 | 1.10E-09 | 0 | Mesenchymal<br>progenitor_0 |
| Gm9493   | 1.18E-13 | 0.25021153<br>6  | 0.50<br>2 | 0.29<br>5 | 1.71E-09 | 0 | Mesenchymal<br>progenitor_0 |
| Nme1     | 1.38E-13 | 0.27755174<br>9  | 0.85<br>5 | 0.74<br>6 | 2.02E-09 | 0 | Mesenchymal<br>progenitor_0 |
| Usp50    | 2.57E-13 | -0.2792916<br>45 | 0.77<br>1 | 0.80<br>7 | 3.75E-09 | 0 | Mesenchymal<br>progenitor_0 |
| Dync1i2  | 6.26E-13 | -0.3164853<br>79 | 0.40<br>1 | 0.54<br>9 | 9.11E-09 | 0 | Mesenchymal<br>progenitor_0 |
| Pgk1     | 8.44E-13 | 0.29363999<br>9  | 0.63      | 0.45<br>8 | 1.23E-08 | 0 | Mesenchymal<br>progenitor_0 |
| Toporsos | 3.06E-12 | -0.3110297<br>11 | 0.23<br>9 | 0.38<br>7 | 4.45E-08 | 0 | Mesenchymal<br>progenitor_0 |
| Vps8     | 7.70E-11 | -0.2658414<br>85 | 0.07<br>3 | 0.18<br>1 | 1.12E-06 | 0 | Mesenchymal<br>progenitor_0 |
| Ssbp3    | 2.60E-10 | -0.2764523<br>73 | 0.25<br>3 | 0.38<br>9 | 3.79E-06 | 0 | Mesenchymal<br>progenitor_0 |
| PISD     | 3.27E-10 | -0.2571742<br>54 | 0.12<br>5 | 0.24<br>5 | 4.77E-06 | 0 | Mesenchymal<br>progenitor_0 |
| Ptrf     | 3.46E-10 | -0.2671637<br>18 | 0.75<br>8 | 0.79<br>4 | 5.04E-06 | 0 | Mesenchymal<br>progenitor_0 |
| Hk2      | 4.66E-10 | -0.2946943<br>12 | 0.14<br>4 | 0.26<br>6 | 6.79E-06 | 0 | Mesenchymal<br>progenitor_0 |
| Mmp23    | 5.33E-10 | -0.2755495<br>41 | 0.56<br>8 | 0.65<br>3 | 7.76E-06 | 0 | Mesenchymal<br>progenitor_0 |
| Clec11a  | 6.96E-10 | -0.3138744<br>42 | 0.28<br>6 | 0.41<br>5 | 1.01E-05 | 0 | Mesenchymal<br>progenitor_0 |
| Maged1   | 1.34E-09 | -0.2548808<br>64 | 0.68<br>8 | 0.76<br>2 | 1.95E-05 | 0 | Mesenchymal<br>progenitor_0 |
| Bicc1    | 2.46E-09 | -0.2664361<br>89 | 0.60<br>7 | 0.69<br>3 | 3.59E-05 | 0 | Mesenchymal<br>progenitor_0 |



|         |          |                       |              |              |                 |   |                             |
|---------|----------|-----------------------|--------------|--------------|-----------------|---|-----------------------------|
| Pam     | 5.37E-09 | -0.3545617<br>98      | 0.32<br>6    | 0.43<br>4    | 7.82E-05        | 0 | Mesenchymal<br>progenitor_0 |
| Tspan31 | 6.62E-09 | -0.2554315<br>94      | 0.28<br>7    | 0.40<br>6    | 9.65E-05        | 0 | Mesenchymal<br>progenitor_0 |
| Fgfr2   | 7.03E-09 | -0.2667636<br>09      | 0.23<br>2    | 0.36<br>1    | 0.00010244<br>9 | 0 | Mesenchymal<br>progenitor_0 |
| Nrp2    | 7.07E-09 | -0.3130486<br>87      | 0.62<br>8    | 0.71<br>2    | 0.00010302<br>5 | 0 | Mesenchymal<br>progenitor_0 |
| Ctsb    | 1.02E-08 | -0.3268117<br>3       | 0.76<br>8    | 0.79<br>8    | 0.00014911<br>2 | 0 | Mesenchymal<br>progenitor_0 |
| Igfbp4  | 4.17E-08 | -0.3290485<br>82      | 0.69<br>9    | 0.76<br>2    | 0.00060670<br>6 | 0 | Mesenchymal<br>progenitor_0 |
| Ier2    | 5.06E-08 | -0.3672142<br>8       | 0.42<br>8    | 0.51<br>5    | 0.00073628<br>8 | 0 | Mesenchymal<br>progenitor_0 |
| Zfp36   | 5.80E-08 | -0.2508399<br>57      | 0.14<br>4    | 0.24<br>9    | 0.00084415<br>1 | 0 | Mesenchymal<br>progenitor_0 |
| Ptprs   | 7.26E-08 | -0.2824615<br>58      | 0.47<br>0.47 | 0.56<br>0.56 | 0.00105798      | 0 | Mesenchymal<br>progenitor_0 |
| Gpx3    | 8.32E-08 | -0.3716530<br>44      | 0.71<br>9    | 0.75<br>5    | 0.00121243<br>7 | 0 | Mesenchymal<br>progenitor_0 |
| Tmem86a | 1.16E-07 | -0.3053598<br>49      | 0.30<br>3    | 0.41<br>8    | 0.00168664<br>4 | 0 | Mesenchymal<br>progenitor_0 |
| Kcnk2   | 2.22E-07 | -0.2592153<br>24      | 0.10<br>9    | 0.20<br>4    | 0.00323061<br>2 | 0 | Mesenchymal<br>progenitor_0 |
| Acta2   | 2.67E-07 | -0.2665798<br>88      | 0.97<br>5    | 0.96<br>2    | 0.00389023<br>6 | 0 | Mesenchymal<br>progenitor_0 |
| Mef2c   | 3.00E-07 | -0.3030594<br>87      | 0.32<br>2    | 0.41<br>5    | 0.00436480<br>8 | 0 | Mesenchymal<br>progenitor_0 |
| Rps29   | 1.51E-14 | -0.6424916<br>5<br>26 | 1<br>1       | 1<br>1       | 2.20E-141       | 1 | Mesenchymal<br>progenitor_1 |
| Rps28   | 2.98E-14 | -0.9066328<br>5<br>05 | 0.98<br>7    | 0.99<br>7    | 4.33E-141       | 1 | Mesenchymal<br>progenitor_1 |
| Rpl41   | 1.45E-11 | -0.4730541<br>1<br>81 | 1<br>1       | 1<br>1       | 2.10E-107       | 1 | Mesenchymal<br>progenitor_1 |
| Rpl38   | 8.22E-10 | -0.6390218<br>6<br>7  | 0.99<br>4    | 1<br>1       | 1.20E-101       | 1 | Mesenchymal<br>progenitor_1 |
| Rps27   | 1.20E-95 | -0.4925632<br>13      | 1<br>1       | 1<br>1       | 1.75E-91        | 1 | Mesenchymal<br>progenitor_1 |
| Gm10076 | 2.27E-76 | -0.4697912<br>12      | 0.99<br>6    | 0.99<br>5    | 3.31E-72        | 1 | Mesenchymal<br>progenitor_1 |
| Rpl37a  | 4.29E-69 | -0.3739754<br>44      | 1<br>1       | 1<br>1       | 6.25E-65        | 1 | Mesenchymal<br>progenitor_1 |
| Gm26917 | 6.57E-68 | 0.76180455<br>7       | 0.91<br>9    | 0.61<br>9    | 9.57E-64        | 1 | Mesenchymal<br>progenitor_1 |
| Gm8730  | 9.80E-66 | 0.63392970<br>6       | 0.98<br>9    | 0.94<br>9    | 1.43E-61        | 1 | Mesenchymal<br>progenitor_1 |
| Rpl36   | 3.77E-62 | -0.4435412<br>67      | 0.98<br>5    | 0.99<br>7    | 5.49E-58        | 1 | Mesenchymal<br>progenitor_1 |

|         |          |                  |           |           |          |   |                             |
|---------|----------|------------------|-----------|-----------|----------|---|-----------------------------|
| Calr    | 1.89E-49 | 0.66920457<br>8  | 0.91<br>3 | 0.65<br>4 | 2.76E-45 | 1 | Mesenchymal<br>progenitor_1 |
| Atp5k   | 7.51E-49 | -0.5474539<br>98 | 0.85<br>1 | 0.97<br>3 | 1.09E-44 | 1 | Mesenchymal<br>progenitor_1 |
| mt-Nd2  | 1.19E-44 | -0.6118308<br>81 | 0.71<br>8 | 0.90<br>7 | 1.73E-40 | 1 | Mesenchymal<br>progenitor_1 |
| Rpl37   | 2.90E-44 | -0.3430202<br>04 | 1<br>1    | 1         | 4.22E-40 | 1 | Mesenchymal<br>progenitor_1 |
| Rpl39   | 2.59E-42 | -0.4418872<br>04 | 0.98<br>5 | 0.99<br>4 | 3.77E-38 | 1 | Mesenchymal<br>progenitor_1 |
| Rps21   | 4.21E-41 | -0.4312160<br>3  | 0.92<br>3 | 0.98<br>7 | 6.14E-37 | 1 | Mesenchymal<br>progenitor_1 |
| Rps2    | 1.76E-40 | 0.42819513<br>3  | 0.99<br>8 | 0.97<br>4 | 2.56E-36 | 1 | Mesenchymal<br>progenitor_1 |
| mt-Cytb | 5.81E-39 | 0.29731876<br>2  | 1         | 1         | 8.46E-35 | 1 | Mesenchymal<br>progenitor_1 |
| Ibsp    | 3.78E-38 | 0.89147902<br>6  | 0.78<br>2 | 0.41<br>8 | 5.51E-34 | 1 | Mesenchymal<br>progenitor_1 |
| Nmt1    | 3.32E-37 | -0.7096536<br>43 | 0.18<br>5 | 0.52<br>6 | 4.83E-33 | 1 | Mesenchymal<br>progenitor_1 |
| Malat1  | 3.99E-33 | -0.4812486<br>11 | 1         | 1         | 5.81E-29 | 1 | Mesenchymal<br>progenitor_1 |
| Sertad2 | 4.93E-32 | -0.6739339<br>66 | 0.21<br>7 | 0.52<br>6 | 7.18E-28 | 1 | Mesenchymal<br>progenitor_1 |
| Ndufa3  | 4.11E-30 | -0.4286221<br>17 | 0.83<br>1 | 0.93<br>2 | 5.99E-26 | 1 | Mesenchymal<br>progenitor_1 |
| Snhg9   | 1.34E-28 | -0.5659495<br>77 | 0.04<br>7 | 0.30<br>4 | 1.95E-24 | 1 | Mesenchymal<br>progenitor_1 |
| mt-Nd4  | 1.86E-28 | 0.30534784<br>6  | 0.99<br>8 | 0.99<br>5 | 2.70E-24 | 1 | Mesenchymal<br>progenitor_1 |
| Eif2s2  | 4.13E-27 | -0.4843579<br>05 | 0.74<br>2 | 0.87<br>8 | 6.01E-23 | 1 | Mesenchymal<br>progenitor_1 |
| mt-Atp6 | 4.29E-27 | 0.25556183<br>4  | 1         | 1         | 6.24E-23 | 1 | Mesenchymal<br>progenitor_1 |
| Hes1    | 1.92E-26 | -0.6928878<br>93 | 0.34<br>3 | 0.61<br>1 | 2.79E-22 | 1 | Mesenchymal<br>progenitor_1 |
| Sec61g  | 2.94E-26 | -0.3089008<br>96 | 0.96<br>8 | 0.99      | 4.28E-22 | 1 | Mesenchymal<br>progenitor_1 |
| Rpl15   | 7.87E-26 | 0.40382244       | 0.94<br>9 | 0.85<br>9 | 1.15E-21 | 1 | Mesenchymal<br>progenitor_1 |
| Usmg5   | 8.64E-26 | -0.4306502<br>22 | 0.71      | 0.84<br>4 | 1.26E-21 | 1 | Mesenchymal<br>progenitor_1 |
| mt-Nd3  | 1.89E-25 | -0.5619254<br>74 | 0.16<br>6 | 0.44<br>4 | 2.75E-21 | 1 | Mesenchymal<br>progenitor_1 |
| Pfn1    | 8.20E-24 | 0.26825480<br>4  | 1         | 0.98<br>9 | 1.19E-19 | 1 | Mesenchymal<br>progenitor_1 |
| Lmo4    | 1.50E-23 | -0.5546117<br>9  | 0.46<br>9 | 0.70<br>3 | 2.19E-19 | 1 | Mesenchymal<br>progenitor_1 |

|                   |          |                  |            |           |          |   |                             |
|-------------------|----------|------------------|------------|-----------|----------|---|-----------------------------|
| Nme2              | 1.54E-22 | 0.53585943<br>2  | 0.44<br>6  | 0.20<br>6 | 2.24E-18 | 1 | Mesenchymal<br>progenitor_1 |
| Myeov2            | 1.37E-20 | -0.3568105<br>01 | 0.84<br>6  | 0.91<br>6 | 1.99E-16 | 1 | Mesenchymal<br>progenitor_1 |
| Rpl29             | 3.01E-20 | 0.43191839<br>1  | 0.70<br>4  | 0.49<br>2 | 4.38E-16 | 1 | Mesenchymal<br>progenitor_1 |
| Polr2l            | 4.93E-20 | -0.4962617<br>95 | 0.46<br>7  | 0.67<br>7 | 7.18E-16 | 1 | Mesenchymal<br>progenitor_1 |
| Rps27rt           | 2.51E-18 | -0.4773420<br>3  | 0.18<br>8  | 0.42      | 3.65E-14 | 1 | Mesenchymal<br>progenitor_1 |
| 2010107E04<br>Rik | 2.44E-17 | -0.4161238<br>83 | 0.58<br>2  | 0.74<br>6 | 3.55E-13 | 1 | Mesenchymal<br>progenitor_1 |
| Gm10260           | 7.46E-17 | 0.25355811<br>4  | 0.99<br>4  | 0.97<br>7 | 1.09E-12 | 1 | Mesenchymal<br>progenitor_1 |
| Egr1              | 8.98E-17 | -0.4989157<br>33 | 0.38<br>8  | 0.60<br>5 | 1.31E-12 | 1 | Mesenchymal<br>progenitor_1 |
| Igkc              | 1.17E-16 | 1.11909222<br>8  | 0.29<br>8  | 0.10<br>9 | 1.70E-12 | 1 | Mesenchymal<br>progenitor_1 |
| Rplp0             | 1.80E-16 | 0.25018037<br>9  | 0.99<br>8  | 0.97<br>7 | 2.62E-12 | 1 | Mesenchymal<br>progenitor_1 |
| Crip1             | 5.22E-16 | -0.4901509<br>25 | 0.81<br>25 | 0.89<br>9 | 7.61E-12 | 1 | Mesenchymal<br>progenitor_1 |
| Snhg18            | 7.40E-16 | -0.3681386<br>29 | 0.41<br>1  | 0.62<br>2 | 1.08E-11 | 1 | Mesenchymal<br>progenitor_1 |
| Fos               | 2.41E-15 | -0.4840361<br>47 | 0.58<br>6  | 0.74<br>4 | 3.50E-11 | 1 | Mesenchymal<br>progenitor_1 |
| Gm10116           | 2.58E-15 | 0.40627253<br>4  | 0.52<br>5  | 0.31<br>5 | 3.76E-11 | 1 | Mesenchymal<br>progenitor_1 |
| Pet100            | 4.87E-15 | -0.4341010<br>5  | 0.33<br>1  | 0.53<br>5 | 7.10E-11 | 1 | Mesenchymal<br>progenitor_1 |
| Arpc1b            | 6.90E-15 | 0.27124659<br>1  | 0.91<br>3  | 0.83<br>1 | 1.01E-10 | 1 | Mesenchymal<br>progenitor_1 |
| Rbp4              | 1.70E-14 | 0.50759127<br>6  | 0.22<br>6  | 0.06<br>9 | 2.48E-10 | 1 | Mesenchymal<br>progenitor_1 |
| Manf              | 2.40E-14 | 0.43707815<br>1  | 0.60<br>6  | 0.42<br>9 | 3.50E-10 | 1 | Mesenchymal<br>progenitor_1 |
| Gm10263           | 2.55E-14 | -0.3149312<br>54 | 0.02<br>4  | 0.15<br>8 | 3.71E-10 | 1 | Mesenchymal<br>progenitor_1 |
| Hspa5             | 1.23E-13 | 0.42737392<br>5  | 0.64<br>4  | 0.46<br>8 | 1.80E-09 | 1 | Mesenchymal<br>progenitor_1 |
| Gm10126           | 1.78E-13 | -0.2722423<br>03 | 0.01<br>7  | 0.13<br>5 | 2.59E-09 | 1 | Mesenchymal<br>progenitor_1 |
| Ppp1r14b          | 1.55E-12 | 0.35597463<br>5  | 0.70<br>8  | 0.57<br>2 | 2.26E-08 | 1 | Mesenchymal<br>progenitor_1 |
| Pdia3             | 6.31E-12 | 0.35854296<br>4  | 0.39<br>5  | 0.21<br>7 | 9.19E-08 | 1 | Mesenchymal<br>progenitor_1 |
| Gstp1             | 3.51E-11 | 0.36961475<br>6  | 0.51<br>4  | 0.34<br>9 | 5.11E-07 | 1 | Mesenchymal<br>progenitor_1 |

|          |          |                  |           |           |                 |   |                             |
|----------|----------|------------------|-----------|-----------|-----------------|---|-----------------------------|
| Psap     | 3.59E-11 | -0.3152060<br>77 | 0.80<br>8 | 0.89<br>9 | 5.23E-07        | 1 | Mesenchymal<br>progenitor_1 |
| Canx     | 3.87E-11 | 0.28077538<br>7  | 0.78      | 0.63      | 5.63E-07        | 1 | Mesenchymal<br>progenitor_1 |
| Maob     | 1.18E-10 | -0.3963760<br>19 | 0.22<br>6 | 0.38<br>6 | 1.72E-06        | 1 | Mesenchymal<br>progenitor_1 |
| Esm1     | 1.76E-10 | 0.33360057<br>7  | 0.10<br>9 | 0.01<br>9 | 2.56E-06        | 1 | Mesenchymal<br>progenitor_1 |
| Dync1i2  | 3.05E-10 | -0.3282283<br>37 | 0.36<br>9 | 0.53<br>4 | 4.44E-06        | 1 | Mesenchymal<br>progenitor_1 |
| Ptrf     | 3.05E-10 | -0.2543065<br>62 | 0.70<br>1 | 0.81<br>2 | 4.44E-06        | 1 | Mesenchymal<br>progenitor_1 |
| Cdkn1a   | 5.65E-10 | 0.29365133<br>8  | 0.59<br>3 | 0.42<br>3 | 8.23E-06        | 1 | Mesenchymal<br>progenitor_1 |
| Eif4ebp1 | 6.05E-10 | 0.30213193<br>3  | 0.79<br>1 | 0.68<br>3 | 8.82E-06        | 1 | Mesenchymal<br>progenitor_1 |
| Actn4    | 8.11E-10 | -0.2908797<br>47 | 0.69<br>3 | 0.78<br>1 | 1.18E-05        | 1 | Mesenchymal<br>progenitor_1 |
| Fosb     | 8.77E-10 | -0.3139150<br>39 | 0.19<br>6 | 0.36<br>3 | 1.28E-05        | 1 | Mesenchymal<br>progenitor_1 |
| Pdia6    | 9.48E-10 | 0.34546348<br>6  | 0.56<br>1 | 0.39<br>4 | 1.38E-05        | 1 | Mesenchymal<br>progenitor_1 |
| Snrpg    | 1.01E-09 | -0.2866294<br>38 | 0.68<br>2 | 0.78<br>1 | 1.47E-05        | 1 | Mesenchymal<br>progenitor_1 |
| Mmp17    | 1.31E-09 | -0.3801181<br>55 | 0.23<br>4 | 0.38<br>3 | 1.91E-05        | 1 | Mesenchymal<br>progenitor_1 |
| Mrps6    | 2.06E-09 | 0.33859705<br>1  | 0.65<br>5 | 0.52<br>4 | 3.00E-05        | 1 | Mesenchymal<br>progenitor_1 |
| Cycs     | 2.56E-09 | 0.28154265<br>1  | 0.52      | 0.36<br>7 | 3.73E-05        | 1 | Mesenchymal<br>progenitor_1 |
| Igfbp5   | 2.57E-09 | -0.5110392<br>31 | 0.48      | 0.62<br>7 | 3.75E-05        | 1 | Mesenchymal<br>progenitor_1 |
| Nisch    | 2.74E-09 | -0.2896422<br>8  | 0.50<br>8 | 0.63<br>3 | 3.99E-05        | 1 | Mesenchymal<br>progenitor_1 |
| Myh9     | 3.05E-09 | -0.2979278<br>48 | 0.58      | 0.69<br>3 | 4.44E-05        | 1 | Mesenchymal<br>progenitor_1 |
| Gm10073  | 3.08E-09 | -0.2977722<br>43 | 0.48<br>2 | 0.62<br>2 | 4.49E-05        | 1 | Mesenchymal<br>progenitor_1 |
| Toporsos | 3.14E-09 | -0.2994572<br>31 | 0.16<br>2 | 0.31<br>5 | 4.57E-05        | 1 | Mesenchymal<br>progenitor_1 |
| Pgk1     | 4.05E-09 | 0.29981579<br>5  | 0.46      | 0.29<br>9 | 5.90E-05        | 1 | Mesenchymal<br>progenitor_1 |
| Gm10020  | 4.91E-09 | 0.27564489<br>6  | 0.37<br>1 | 0.22<br>2 | 7.14E-05        | 1 | Mesenchymal<br>progenitor_1 |
| Grn      | 8.72E-09 | -0.3555048<br>69 | 0.40<br>9 | 0.54<br>3 | 0.00012705<br>1 | 1 | Mesenchymal<br>progenitor_1 |
| Bst2     | 9.37E-09 | 0.29897378<br>5  | 0.27<br>5 | 0.14<br>1 | 0.00013647<br>1 | 1 | Mesenchymal<br>progenitor_1 |

|                   |               |                  |           |           |                 |   |                             |
|-------------------|---------------|------------------|-----------|-----------|-----------------|---|-----------------------------|
| Lox               | 2.58E-08      | 0.26309357<br>8  | 0.95<br>7 | 0.91<br>2 | 0.00037594<br>1 | 1 | Mesenchymal<br>progenitor_1 |
| S100a16           | 2.86E-08      | 0.25069710<br>6  | 0.68<br>4 | 0.55<br>6 | 0.00041602<br>7 | 1 | Mesenchymal<br>progenitor_1 |
| Pam               | 5.61E-08      | -0.3829678<br>75 | 0.35      | 0.47<br>7 | 0.00081638<br>7 | 1 | Mesenchymal<br>progenitor_1 |
| Hp                | 6.76E-08      | 0.45135590<br>5  | 0.75      | 0.63<br>5 | 0.00098382<br>3 | 1 | Mesenchymal<br>progenitor_1 |
| Thbs2             | 7.03E-08      | -0.2532594<br>7  | 0.76<br>3 | 0.83<br>6 | 0.00102384<br>2 | 1 | Mesenchymal<br>progenitor_1 |
| Hnrnpa3           | 1.10E-07      | 0.25711442<br>8  | 0.72<br>9 | 0.64      | 0.00159505      | 1 | Mesenchymal<br>progenitor_1 |
| Usp50             | 1.10E-07      | -0.2796555<br>92 | 0.64<br>8 | 0.74<br>4 | 0.00159724<br>3 | 1 | Mesenchymal<br>progenitor_1 |
| Desi1             | 1.12E-07      | -0.2674451<br>81 | 0.12<br>8 | 0.24<br>6 | 0.00162519<br>2 | 1 | Mesenchymal<br>progenitor_1 |
| Timp1             | 1.12E-07      | 0.33813399<br>3  | 0.69<br>9 | 0.60<br>8 | 0.00163642<br>7 | 1 | Mesenchymal<br>progenitor_1 |
| H2-D1             | 1.31E-07      | 0.29676192       | 0.93<br>4 | 0.91<br>2 | 0.00191245<br>8 | 1 | Mesenchymal<br>progenitor_1 |
| Gpc1              | 2.20E-07      | -0.3105447<br>13 | 0.30<br>9 | 0.43<br>7 | 0.00320260<br>2 | 1 | Mesenchymal<br>progenitor_1 |
| mt-Atp8           | 2.38E-07      | -0.2659190<br>01 | 0.47<br>6 | 0.6       | 0.00347299<br>8 | 1 | Mesenchymal<br>progenitor_1 |
| Gm8186            | 2.46E-07      | -0.2664386<br>63 | 0.20<br>5 | 0.33<br>8 | 0.00358029<br>3 | 1 | Mesenchymal<br>progenitor_1 |
| 1110008P14<br>Rik | 3.13E-07      | 0.25960693<br>5  | 0.38<br>8 | 0.25<br>7 | 0.00456009      | 1 | Mesenchymal<br>progenitor_1 |
| Ogn               | 3.83E-07      | -0.2545062       | 0.74<br>8 | 0.82<br>8 | 0.00557635<br>7 | 1 | Mesenchymal<br>progenitor_1 |
| Ccng1             | 4.05E-07      | 0.28357698<br>9  | 0.51<br>4 | 0.39<br>1 | 0.00590233      | 1 | Mesenchymal<br>progenitor_1 |
| Adgra2            | 5.96E-07      | -0.2663009<br>39 | 0.16<br>4 | 0.28<br>6 | 0.00867866<br>8 | 1 | Mesenchymal<br>progenitor_1 |
| Rps28             | 4.29E-15<br>1 | -0.9562256<br>58 | 0.99<br>1 | 1         | 6.24E-147       | 2 | Mesenchymal<br>progenitor_2 |
| Rps29             | 3.01E-13<br>6 | -0.6400795<br>28 | 1         | 1         | 4.38E-132       | 2 | Mesenchymal<br>progenitor_2 |
| Rpl38             | 5.59E-11<br>0 | -0.5943511<br>19 | 1         | 1         | 8.14E-106       | 2 | Mesenchymal<br>progenitor_2 |
| Rpl41             | 1.80E-93      | -0.4065852<br>46 | 1         | 1         | 2.63E-89        | 2 | Mesenchymal<br>progenitor_2 |
| Rps27             | 8.51E-91      | -0.4484573<br>49 | 1         | 1         | 1.24E-86        | 2 | Mesenchymal<br>progenitor_2 |
| Gm8730            | 3.45E-74      | 0.65350825<br>6  | 0.99      | 0.96<br>8 | 5.02E-70        | 2 | Mesenchymal<br>progenitor_2 |
| Gm26917           | 9.32E-72      | 0.71149589       | 0.93<br>7 | 0.71<br>3 | 1.36E-67        | 2 | Mesenchymal<br>progenitor_2 |

|         |          |                  |           |           |          |   |                             |
|---------|----------|------------------|-----------|-----------|----------|---|-----------------------------|
| Rps2    | 5.91E-68 | 0.51704069<br>1  | 1         | 0.98<br>3 | 8.60E-64 | 2 | Mesenchymal<br>progenitor_2 |
| Rpl37a  | 2.18E-62 | -0.3218387<br>06 | 1         | 1         | 3.17E-58 | 2 | Mesenchymal<br>progenitor_2 |
| Gm10076 | 1.42E-56 | -0.3698007<br>29 | 1         | 1         | 2.06E-52 | 2 | Mesenchymal<br>progenitor_2 |
| mt-Nd2  | 1.35E-52 | -0.6583481<br>86 | 0.75<br>1 | 0.93<br>9 | 1.96E-48 | 2 | Mesenchymal<br>progenitor_2 |
| Rps21   | 5.30E-51 | -0.4379472<br>57 | 0.97      | 0.98<br>9 | 7.71E-47 | 2 | Mesenchymal<br>progenitor_2 |
| Nmt1    | 1.13E-45 | -0.6883919<br>31 | 0.23<br>5 | 0.62<br>6 | 1.64E-41 | 2 | Mesenchymal<br>progenitor_2 |
| lbsp    | 3.59E-44 | 0.78623267<br>4  | 0.69<br>7 | 0.31<br>5 | 5.23E-40 | 2 | Mesenchymal<br>progenitor_2 |
| Atp5k   | 6.45E-44 | -0.5235882<br>39 | 0.86<br>1 | 0.94<br>6 | 9.39E-40 | 2 | Mesenchymal<br>progenitor_2 |
| Eif2s2  | 7.38E-44 | -0.5317927<br>23 | 0.87<br>5 | 0.95<br>2 | 1.07E-39 | 2 | Mesenchymal<br>progenitor_2 |
| Rpl36   | 2.63E-42 | -0.3346469<br>99 | 0.99      | 1         | 3.83E-38 | 2 | Mesenchymal<br>progenitor_2 |
| Rpl15   | 1.88E-41 | 0.47052664<br>3  | 0.97<br>2 | 0.90<br>9 | 2.74E-37 | 2 | Mesenchymal<br>progenitor_2 |
| mt-Cytb | 5.39E-39 | 0.30524512<br>1  | 1         | 1         | 7.85E-35 | 2 | Mesenchymal<br>progenitor_2 |
| Rpl37   | 5.77E-39 | -0.2978300<br>81 | 1         | 1         | 8.41E-35 | 2 | Mesenchymal<br>progenitor_2 |
| Calr    | 6.19E-39 | 0.55099835<br>1  | 0.94<br>4 | 0.79<br>9 | 9.01E-35 | 2 | Mesenchymal<br>progenitor_2 |
| Nme2    | 5.44E-37 | 0.64031573<br>3  | 0.63<br>1 | 0.32<br>2 | 7.92E-33 | 2 | Mesenchymal<br>progenitor_2 |
| Rpl39   | 1.53E-36 | -0.3975311<br>36 | 0.99<br>3 | 0.99<br>8 | 2.23E-32 | 2 | Mesenchymal<br>progenitor_2 |
| Snhg9   | 2.37E-35 | -0.5080967<br>66 | 0.06<br>4 | 0.37<br>2 | 3.45E-31 | 2 | Mesenchymal<br>progenitor_2 |
| Sec61g  | 4.58E-34 | -0.3068109<br>97 | 0.99<br>1 | 0.99<br>1 | 6.67E-30 | 2 | Mesenchymal<br>progenitor_2 |
| Malat1  | 4.07E-31 | -0.3996420<br>84 | 1         | 1         | 5.93E-27 | 2 | Mesenchymal<br>progenitor_2 |
| Usmg5   | 1.16E-30 | -0.4437386<br>2  | 0.77<br>6 | 0.91<br>6 | 1.69E-26 | 2 | Mesenchymal<br>progenitor_2 |
| Sertad2 | 8.34E-30 | -0.5662712<br>61 | 0.38<br>1 | 0.67<br>8 | 1.21E-25 | 2 | Mesenchymal<br>progenitor_2 |
| Rplp0   | 4.47E-27 | 0.32160429<br>1  | 0.99<br>8 | 0.99<br>8 | 6.51E-23 | 2 | Mesenchymal<br>progenitor_2 |
| Lmo4    | 7.88E-26 | -0.5459259<br>24 | 0.42<br>8 | 0.7       | 1.15E-21 | 2 | Mesenchymal<br>progenitor_2 |
| mt-Atp6 | 4.84E-25 | 0.26184782<br>2  | 1         | 1         | 7.05E-21 | 2 | Mesenchymal<br>progenitor_2 |

|                   |          |                  |           |           |          |   |                             |
|-------------------|----------|------------------|-----------|-----------|----------|---|-----------------------------|
| Ndufa3            | 8.25E-25 | -0.3787420<br>67 | 0.82<br>6 | 0.92<br>4 | 1.20E-20 | 2 | Mesenchymal<br>progenitor_2 |
| Rpl29             | 1.24E-24 | 0.43661767<br>6  | 0.76<br>5 | 0.56<br>8 | 1.81E-20 | 2 | Mesenchymal<br>progenitor_2 |
| mt-Nd4            | 3.06E-23 | 0.29334846<br>8  | 1         | 0.99<br>8 | 4.45E-19 | 2 | Mesenchymal<br>progenitor_2 |
| Fos               | 4.40E-23 | -0.6199480<br>9  | 0.43<br>5 | 0.69<br>8 | 6.41E-19 | 2 | Mesenchymal<br>progenitor_2 |
| Ftl1              | 1.33E-22 | 0.25157701<br>3  | 1         | 0.99<br>8 | 1.93E-18 | 2 | Mesenchymal<br>progenitor_2 |
| Rps18             | 3.11E-22 | 0.25813614<br>4  | 1         | 0.99<br>6 | 4.53E-18 | 2 | Mesenchymal<br>progenitor_2 |
| Igkc              | 2.07E-21 | 0.89427937<br>4  | 0.36<br>2 | 0.12<br>3 | 3.02E-17 | 2 | Mesenchymal<br>progenitor_2 |
| Gm10260           | 2.14E-21 | 0.28272503<br>3  | 0.99<br>5 | 0.98<br>7 | 3.12E-17 | 2 | Mesenchymal<br>progenitor_2 |
| Snrpg             | 4.64E-21 | -0.3550118<br>33 | 0.70<br>1 | 0.84<br>5 | 6.76E-17 | 2 | Mesenchymal<br>progenitor_2 |
| Rps27rt           | 4.79E-21 | -0.3986832<br>64 | 0.25<br>2 | 0.51<br>2 | 6.97E-17 | 2 | Mesenchymal<br>progenitor_2 |
| Hes1              | 5.97E-21 | -0.5664358<br>39 | 0.44<br>7 | 0.65<br>9 | 8.69E-17 | 2 | Mesenchymal<br>progenitor_2 |
| Nisch             | 1.13E-20 | -0.4042828<br>77 | 0.53<br>6 | 0.75<br>6 | 1.64E-16 | 2 | Mesenchymal<br>progenitor_2 |
| mt-Nd3            | 1.45E-20 | -0.4241519<br>22 | 0.20<br>5 | 0.46<br>7 | 2.12E-16 | 2 | Mesenchymal<br>progenitor_2 |
| Ogn               | 1.13E-18 | -0.4973547<br>37 | 0.68<br>3 | 0.84<br>9 | 1.65E-14 | 2 | Mesenchymal<br>progenitor_2 |
| Gm10263           | 3.08E-18 | -0.2923295<br>62 | 0.03<br>5 | 0.20<br>3 | 4.48E-14 | 2 | Mesenchymal<br>progenitor_2 |
| Polr2l            | 3.31E-18 | -0.4137287<br>87 | 0.55      | 0.76<br>2 | 4.82E-14 | 2 | Mesenchymal<br>progenitor_2 |
| Gm10073           | 3.62E-18 | -0.3536206<br>99 | 0.60<br>5 | 0.77<br>5 | 5.27E-14 | 2 | Mesenchymal<br>progenitor_2 |
| Prss23            | 1.08E-17 | 0.39707429<br>4  | 0.95<br>5 | 0.92<br>6 | 1.58E-13 | 2 | Mesenchymal<br>progenitor_2 |
| MyI9              | 2.32E-17 | -0.2591694<br>26 | 0.99      | 0.99<br>8 | 3.38E-13 | 2 | Mesenchymal<br>progenitor_2 |
| Egr1              | 4.58E-17 | -0.4541898<br>96 | 0.28<br>9 | 0.51      | 6.68E-13 | 2 | Mesenchymal<br>progenitor_2 |
| 2010107E04<br>Rik | 1.24E-16 | -0.3014659<br>81 | 0.63<br>1 | 0.80<br>1 | 1.81E-12 | 2 | Mesenchymal<br>progenitor_2 |
| Snhg18            | 1.58E-16 | -0.4044956<br>96 | 0.50<br>6 | 0.71<br>1 | 2.31E-12 | 2 | Mesenchymal<br>progenitor_2 |
| Timp1             | 1.98E-15 | 0.37248687<br>3  | 0.91      | 0.83<br>8 | 2.88E-11 | 2 | Mesenchymal<br>progenitor_2 |
| Myeov2            | 4.30E-15 | -0.2759549<br>39 | 0.87<br>3 | 0.92<br>7 | 6.26E-11 | 2 | Mesenchymal<br>progenitor_2 |

|          |          |                  |           |           |          |   |                          |
|----------|----------|------------------|-----------|-----------|----------|---|--------------------------|
| Lox      | 6.73E-15 | 0.32704086       | 0.98<br>8 | 0.96<br>8 | 9.80E-11 | 2 | Mesenchymal progenitor_2 |
| Dstn     | 2.85E-14 | -0.2741589<br>81 | 0.95<br>5 | 0.98<br>1 | 4.15E-10 | 2 | Mesenchymal progenitor_2 |
| Vamp5    | 3.44E-14 | 0.40675999       | 0.68<br>5 | 0.53<br>1 | 5.02E-10 | 2 | Mesenchymal progenitor_2 |
| Psap     | 9.32E-14 | -0.2694162<br>58 | 0.86<br>4 | 0.92<br>6 | 1.36E-09 | 2 | Mesenchymal progenitor_2 |
| Hnrnpa3  | 2.89E-13 | 0.29882458<br>8  | 0.79<br>8 | 0.66<br>1 | 4.21E-09 | 2 | Mesenchymal progenitor_2 |
| Grn      | 4.98E-13 | -0.3704762<br>45 | 0.42<br>4 | 0.60<br>1 | 7.25E-09 | 2 | Mesenchymal progenitor_2 |
| Rtn4     | 7.58E-13 | 0.28457748       | 0.88<br>5 | 0.78<br>2 | 1.10E-08 | 2 | Mesenchymal progenitor_2 |
| Gm10116  | 1.90E-12 | 0.34527023<br>1  | 0.56<br>9 | 0.4       | 2.77E-08 | 2 | Mesenchymal progenitor_2 |
| Arpc1b   | 4.91E-12 | 0.29006069<br>9  | 0.87<br>7 | 0.79<br>7 | 7.15E-08 | 2 | Mesenchymal progenitor_2 |
| Apoe     | 8.23E-12 | -0.2725910<br>59 | 0.09      | 0.24<br>4 | 1.20E-07 | 2 | Mesenchymal progenitor_2 |
| Wisp1    | 8.26E-12 | 0.27902163<br>4  | 0.86<br>8 | 0.74<br>7 | 1.20E-07 | 2 | Mesenchymal progenitor_2 |
| Actn4    | 9.26E-12 | -0.2662556<br>49 | 0.85<br>9 | 0.93<br>5 | 1.35E-07 | 2 | Mesenchymal progenitor_2 |
| Tomm7    | 1.02E-11 | -0.2710456<br>23 | 0.70<br>3 | 0.83<br>1 | 1.48E-07 | 2 | Mesenchymal progenitor_2 |
| Lasp1    | 1.09E-11 | -0.2763860<br>51 | 0.65<br>9 | 0.78<br>4 | 1.59E-07 | 2 | Mesenchymal progenitor_2 |
| Dkk3     | 1.13E-11 | -0.3202091<br>6  | 0.37<br>6 | 0.56<br>6 | 1.65E-07 | 2 | Mesenchymal progenitor_2 |
| Olfml3   | 1.56E-11 | -0.3409140<br>06 | 0.34<br>1 | 0.52<br>3 | 2.27E-07 | 2 | Mesenchymal progenitor_2 |
| Mmp23    | 2.23E-11 | -0.3191950<br>71 | 0.50<br>1 | 0.69<br>3 | 3.25E-07 | 2 | Mesenchymal progenitor_2 |
| Ndufv3   | 3.16E-11 | -0.2614899<br>08 | 0.77      | 0.86<br>8 | 4.61E-07 | 2 | Mesenchymal progenitor_2 |
| Manf     | 4.20E-11 | 0.32635699<br>1  | 0.70<br>1 | 0.55<br>9 | 6.11E-07 | 2 | Mesenchymal progenitor_2 |
| Bmp1     | 4.29E-11 | 0.28482386<br>7  | 0.68<br>7 | 0.52<br>1 | 6.24E-07 | 2 | Mesenchymal progenitor_2 |
| Pet100   | 7.21E-11 | -0.2894065<br>1  | 0.35<br>5 | 0.53<br>6 | 1.05E-06 | 2 | Mesenchymal progenitor_2 |
| Col4a2   | 1.45E-10 | 0.31807146<br>5  | 0.80<br>5 | 0.68<br>5 | 2.10E-06 | 2 | Mesenchymal progenitor_2 |
| Pdia3    | 1.47E-10 | 0.32792752<br>5  | 0.45<br>4 | 0.3       | 2.14E-06 | 2 | Mesenchymal progenitor_2 |
| Eif4ebp1 | 1.60E-10 | 0.25699878<br>3  | 0.93<br>4 | 0.88<br>5 | 2.33E-06 | 2 | Mesenchymal progenitor_2 |



|            |          |                  |           |           |                 |   |                             |
|------------|----------|------------------|-----------|-----------|-----------------|---|-----------------------------|
| Nupr1      | 2.44E-10 | 0.27898153<br>7  | 0.96<br>5 | 0.91<br>2 | 3.56E-06        | 2 | Mesenchymal<br>progenitor_2 |
| Cxcl12     | 3.96E-10 | -0.3452514<br>99 | 0.71<br>5 | 0.83<br>2 | 5.77E-06        | 2 | Mesenchymal<br>progenitor_2 |
| Ap3s1      | 4.25E-10 | 0.26213399<br>9  | 0.84      | 0.78      | 6.19E-06        | 2 | Mesenchymal<br>progenitor_2 |
| Itm2a      | 4.63E-10 | -0.4071611<br>44 | 0.32<br>9 | 0.49<br>9 | 6.74E-06        | 2 | Mesenchymal<br>progenitor_2 |
| Emilin1    | 8.57E-10 | -0.3198365<br>54 | 0.32<br>7 | 0.48      | 1.25E-05        | 2 | Mesenchymal<br>progenitor_2 |
| Igfbp7     | 8.63E-10 | 0.30271363<br>8  | 0.99      | 0.97<br>8 | 1.26E-05        | 2 | Mesenchymal<br>progenitor_2 |
| Gm10020    | 9.56E-10 | 0.28760772<br>3  | 0.41      | 0.26<br>4 | 1.39E-05        | 2 | Mesenchymal<br>progenitor_2 |
| Ptprs      | 1.03E-09 | -0.2699417<br>2  | 0.41      | 0.57<br>7 | 1.50E-05        | 2 | Mesenchymal<br>progenitor_2 |
| Ppp1r14b   | 1.09E-09 | 0.29289634<br>1  | 0.78<br>3 | 0.68<br>5 | 1.59E-05        | 2 | Mesenchymal<br>progenitor_2 |
| Sept7      | 2.17E-09 | 0.25749984<br>7  | 0.80<br>7 | 0.69<br>3 | 3.16E-05        | 2 | Mesenchymal<br>progenitor_2 |
| Toporsos   | 6.82E-09 | -0.2528733<br>68 | 0.19<br>3 | 0.34<br>6 | 9.93E-05        | 2 | Mesenchymal<br>progenitor_2 |
| Tnfrsf12a  | 7.00E-09 | 0.25475036<br>1  | 0.68<br>3 | 0.56<br>6 | 0.00010190<br>6 | 2 | Mesenchymal<br>progenitor_2 |
| Sap18      | 8.07E-09 | 0.30116960<br>5  | 0.59      | 0.43<br>9 | 0.00011753<br>3 | 2 | Mesenchymal<br>progenitor_2 |
| Dync1i2    | 9.52E-09 | -0.2615442<br>9  | 0.42<br>4 | 0.59<br>2 | 0.00013870<br>4 | 2 | Mesenchymal<br>progenitor_2 |
| Aldh2      | 1.07E-08 | -0.2642711<br>35 | 0.31<br>5 | 0.47<br>7 | 0.00015613<br>5 | 2 | Mesenchymal<br>progenitor_2 |
| Col11a1    | 1.94E-08 | -0.3094778<br>5  | 0.43      | 0.57      | 0.00028312<br>2 | 2 | Mesenchymal<br>progenitor_2 |
| mt-Atp8    | 2.77E-08 | -0.2519929<br>27 | 0.55<br>7 | 0.68<br>7 | 0.00040298<br>8 | 2 | Mesenchymal<br>progenitor_2 |
| Cyb5r1     | 2.98E-08 | 0.25819039<br>2  | 0.42<br>4 | 0.29<br>1 | 0.00043354<br>2 | 2 | Mesenchymal<br>progenitor_2 |
| Cox17      | 3.05E-08 | -0.2709387<br>41 | 0.56      | 0.7       | 0.00044409<br>6 | 2 | Mesenchymal<br>progenitor_2 |
| Tbx18      | 3.11E-08 | 0.33609796<br>5  | 0.30<br>3 | 0.17<br>3 | 0.00045332<br>3 | 2 | Mesenchymal<br>progenitor_2 |
| Lgals3bp   | 3.15E-08 | -0.2645572<br>48 | 0.17<br>2 | 0.30<br>7 | 0.00045858<br>9 | 2 | Mesenchymal<br>progenitor_2 |
| Nexn       | 4.49E-08 | -0.2944139<br>51 | 0.32      | 0.46<br>9 | 0.00065407      | 2 | Mesenchymal<br>progenitor_2 |
| Vamp8      | 5.82E-08 | 0.27096784<br>6  | 0.75<br>7 | 0.66<br>3 | 0.00084696      | 2 | Mesenchymal<br>progenitor_2 |
| Hist2h2aa1 | 1.00E-07 | 0.26744557<br>6  | 0.24<br>9 | 0.13<br>2 | 0.00146191<br>8 | 2 | Mesenchymal<br>progenitor_2 |

|         |          |                  |           |           |                 |   |                             |
|---------|----------|------------------|-----------|-----------|-----------------|---|-----------------------------|
| Pam     | 1.10E-07 | -0.2999647<br>47 | 0.36<br>7 | 0.52<br>1 | 0.00159613<br>1 | 2 | Mesenchymal<br>progenitor_2 |
| Smtn    | 1.63E-07 | -0.2530475<br>56 | 0.23<br>1 | 0.36<br>7 | 0.00237634<br>9 | 2 | Mesenchymal<br>progenitor_2 |
| Gpc1    | 2.21E-07 | -0.2565323<br>48 | 0.30<br>1 | 0.45<br>3 | 0.00322334<br>8 | 2 | Mesenchymal<br>progenitor_2 |
| Maob    | 4.41E-07 | -0.2804184<br>97 | 0.16<br>7 | 0.29<br>1 | 0.00642618<br>1 | 2 | Mesenchymal<br>progenitor_2 |
| Rps28   | 1.58E-97 | -0.9331412<br>32 | 0.99<br>8 | 1<br>1    | 2.30E-93        | 3 | Osteoblast<br>progenitor_3  |
| Rps29   | 1.52E-93 | -0.7009035       | 1         | 1         | 2.22E-89        | 3 | Osteoblast<br>progenitor_3  |
| Rpl41   | 1.51E-82 | -0.4957822<br>16 | 1         | 1         | 2.19E-78        | 3 | Osteoblast<br>progenitor_3  |
| Rpl38   | 6.89E-81 | -0.6431625<br>92 | 1         | 1         | 1.00E-76        | 3 | Osteoblast<br>progenitor_3  |
| Rpl36   | 7.82E-61 | -0.4595128<br>79 | 0.99<br>7 | 1         | 1.14E-56        | 3 | Osteoblast<br>progenitor_3  |
| Gm8730  | 9.88E-61 | 0.66487063<br>6  | 1         | 0.99      | 1.44E-56        | 3 | Osteoblast<br>progenitor_3  |
| Rps27   | 3.51E-56 | -0.4161044<br>38 | 1         | 1         | 5.11E-52        | 3 | Osteoblast<br>progenitor_3  |
| Gm10076 | 1.17E-55 | -0.4030433<br>4  | 1         | 1         | 1.70E-51        | 3 | Osteoblast<br>progenitor_3  |
| Gm26917 | 2.76E-54 | 0.75144119<br>8  | 0.97<br>5 | 0.79<br>5 | 4.02E-50        | 3 | Osteoblast<br>progenitor_3  |
| Snhg9   | 1.60E-50 | -0.7876897<br>25 | 0.11<br>9 | 0.59      | 2.32E-46        | 3 | Osteoblast<br>progenitor_3  |
| Rps2    | 3.49E-50 | 0.41632436<br>6  | 0.99<br>8 | 0.99<br>5 | 5.08E-46        | 3 | Osteoblast<br>progenitor_3  |
| Rpl37   | 2.59E-48 | -0.3401092<br>99 | 1         | 0.99<br>5 | 3.77E-44        | 3 | Osteoblast<br>progenitor_3  |
| Rpl15   | 4.96E-46 | 0.46474627<br>9  | 0.98<br>9 | 0.97<br>6 | 7.23E-42        | 3 | Osteoblast<br>progenitor_3  |
| Rpl37a  | 3.44E-45 | -0.3184781<br>95 | 1         | 1         | 5.00E-41        | 3 | Osteoblast<br>progenitor_3  |
| Eif2s2  | 5.64E-40 | -0.5686537<br>24 | 0.96<br>2 | 0.98      | 8.21E-36        | 3 | Osteoblast<br>progenitor_3  |
| Atp5k   | 7.53E-40 | -0.6770160<br>8  | 0.88<br>8 | 0.96<br>1 | 1.10E-35        | 3 | Osteoblast<br>progenitor_3  |
| Rps21   | 1.02E-37 | -0.3950150<br>42 | 0.99<br>5 | 1         | 1.49E-33        | 3 | Osteoblast<br>progenitor_3  |
| mt-Nd2  | 1.91E-36 | -0.6891543<br>04 | 0.84<br>3 | 0.95<br>6 | 2.79E-32        | 3 | Osteoblast<br>progenitor_3  |
| Nme2    | 3.13E-36 | 0.68867788<br>5  | 0.86<br>9 | 0.50<br>2 | 4.56E-32        | 3 | Osteoblast<br>progenitor_3  |
| Rplp0   | 4.66E-34 | 0.36804686<br>8  | 1         | 1         | 6.78E-30        | 3 | Osteoblast<br>progenitor_3  |

|         |          |                  |           |           |          |   |                            |
|---------|----------|------------------|-----------|-----------|----------|---|----------------------------|
| Nmt1    | 3.81E-33 | -0.6985147<br>86 | 0.31      | 0.69<br>8 | 5.55E-29 | 3 | Osteoblast<br>progenitor_3 |
| Rpl39   | 1.29E-31 | -0.4031551<br>6  | 1         | 1         | 1.88E-27 | 3 | Osteoblast<br>progenitor_3 |
| Ftl1    | 1.52E-30 | 0.44596140<br>7  | 1         | 1         | 2.21E-26 | 3 | Osteoblast<br>progenitor_3 |
| Rpl29   | 7.75E-29 | 0.53101959<br>7  | 0.92<br>4 | 0.8       | 1.13E-24 | 3 | Osteoblast<br>progenitor_3 |
| Lmo4    | 8.04E-29 | -0.6948180<br>76 | 0.60<br>1 | 0.82<br>9 | 1.17E-24 | 3 | Osteoblast<br>progenitor_3 |
| Sec61g  | 9.62E-24 | -0.3074143<br>55 | 0.99<br>2 | 1         | 1.40E-19 | 3 | Osteoblast<br>progenitor_3 |
| Sertad2 | 2.96E-22 | -0.5208829<br>79 | 0.43<br>8 | 0.70<br>2 | 4.31E-18 | 3 | Osteoblast<br>progenitor_3 |
| Ndufa3  | 1.16E-21 | -0.5191582<br>24 | 0.81<br>8 | 0.93<br>2 | 1.69E-17 | 3 | Osteoblast<br>progenitor_3 |
| Rps27rt | 1.97E-21 | -0.5361420<br>69 | 0.50<br>3 | 0.76<br>6 | 2.86E-17 | 3 | Osteoblast<br>progenitor_3 |
| Timp1   | 1.76E-20 | 0.55778196<br>8  | 0.97<br>5 | 0.89<br>8 | 2.56E-16 | 3 | Osteoblast<br>progenitor_3 |
| Malat1  | 1.96E-19 | -0.4908865<br>13 | 1         | 1         | 2.86E-15 | 3 | Osteoblast<br>progenitor_3 |
| Hes1    | 2.77E-19 | -0.6684517<br>45 | 0.39<br>6 | 0.66<br>3 | 4.03E-15 | 3 | Osteoblast<br>progenitor_3 |
| Lox     | 1.06E-18 | 0.52817372<br>8  | 0.94<br>8 | 0.82<br>4 | 1.55E-14 | 3 | Osteoblast<br>progenitor_3 |
| Smpd3   | 1.34E-17 | -0.7829733<br>6  | 0.16<br>9 | 0.42<br>4 | 1.95E-13 | 3 | Osteoblast<br>progenitor_3 |
| Snrpg   | 1.67E-17 | -0.3475152<br>34 | 0.91      | 0.96<br>1 | 2.43E-13 | 3 | Osteoblast<br>progenitor_3 |
| Usmg5   | 4.28E-17 | -0.4101188<br>81 | 0.84<br>3 | 0.92<br>2 | 6.23E-13 | 3 | Osteoblast<br>progenitor_3 |
| Snhg18  | 4.69E-17 | -0.4961714<br>38 | 0.66<br>6 | 0.82<br>9 | 6.83E-13 | 3 | Osteoblast<br>progenitor_3 |
| Gm10263 | 2.04E-16 | -0.3909061<br>78 | 0.09<br>5 | 0.32<br>7 | 2.97E-12 | 3 | Osteoblast<br>progenitor_3 |
| Gm10126 | 9.33E-16 | -0.2731221<br>18 | 0.03      | 0.19      | 1.36E-11 | 3 | Osteoblast<br>progenitor_3 |
| Gm10709 | 1.28E-15 | 0.28016936<br>5  | 0.97<br>5 | 0.97<br>1 | 1.87E-11 | 3 | Osteoblast<br>progenitor_3 |
| Gm10073 | 1.30E-15 | -0.3488546<br>46 | 0.85      | 0.94<br>6 | 1.89E-11 | 3 | Osteoblast<br>progenitor_3 |
| Gm10020 | 1.33E-15 | 0.43378689<br>6  | 0.74<br>4 | 0.44<br>9 | 1.94E-11 | 3 | Osteoblast<br>progenitor_3 |
| Gm10116 | 1.54E-15 | 0.47468713<br>4  | 0.76<br>9 | 0.48<br>3 | 2.24E-11 | 3 | Osteoblast<br>progenitor_3 |
| Chchd2  | 1.89E-14 | 0.28994455<br>3  | 0.98<br>4 | 0.95<br>1 | 2.76E-10 | 3 | Osteoblast<br>progenitor_3 |

|           |          |                  |           |           |          |   |                            |
|-----------|----------|------------------|-----------|-----------|----------|---|----------------------------|
| Apoe      | 1.04E-13 | -0.3249001<br>8  | 0.07<br>4 | 0.26<br>3 | 1.52E-09 | 3 | Osteoblast<br>progenitor_3 |
| Itm2a     | 1.12E-13 | -0.5922884<br>12 | 0.65<br>2 | 0.82      | 1.63E-09 | 3 | Osteoblast<br>progenitor_3 |
| Ppp1r14b  | 7.87E-13 | 0.31647723<br>1  | 0.94<br>3 | 0.87<br>8 | 1.15E-08 | 3 | Osteoblast<br>progenitor_3 |
| Pgk1      | 9.24E-13 | 0.44249639<br>2  | 0.68<br>4 | 0.46<br>8 | 1.35E-08 | 3 | Osteoblast<br>progenitor_3 |
| Ybx1      | 1.32E-12 | 0.25223579<br>3  | 0.97<br>2 | 0.98<br>5 | 1.93E-08 | 3 | Osteoblast<br>progenitor_3 |
| mt-Nd3    | 1.73E-12 | -0.4167390<br>66 | 0.24<br>8 | 0.47<br>3 | 2.52E-08 | 3 | Osteoblast<br>progenitor_3 |
| Igfbp4    | 1.79E-12 | -0.6046580<br>87 | 0.72      | 0.88<br>3 | 2.60E-08 | 3 | Osteoblast<br>progenitor_3 |
| Igkc      | 3.15E-12 | 0.37114744<br>6  | 0.40<br>3 | 0.13<br>2 | 4.59E-08 | 3 | Osteoblast<br>progenitor_3 |
| Pabpc1    | 3.72E-12 | 0.27019504<br>3  | 0.96<br>4 | 0.97<br>6 | 5.41E-08 | 3 | Osteoblast<br>progenitor_3 |
| Timp2     | 1.74E-11 | -0.2827256<br>51 | 0.88<br>1 | 0.96<br>1 | 2.53E-07 | 3 | Osteoblast<br>progenitor_3 |
| Gm8186    | 2.25E-11 | -0.3540647<br>82 | 0.40<br>2 | 0.59<br>5 | 3.28E-07 | 3 | Osteoblast<br>progenitor_3 |
| Psap      | 2.85E-11 | -0.3988565<br>1  | 0.86<br>6 | 0.91<br>2 | 4.15E-07 | 3 | Osteoblast<br>progenitor_3 |
| Fos       | 2.97E-11 | -0.4884198<br>72 | 0.66<br>9 | 0.78      | 4.33E-07 | 3 | Osteoblast<br>progenitor_3 |
| Rpl10-ps3 | 9.22E-11 | 0.29070983<br>4  | 0.55<br>7 | 0.25<br>9 | 1.34E-06 | 3 | Osteoblast<br>progenitor_3 |
| Mef2c     | 2.62E-10 | -0.4613262<br>39 | 0.54<br>1 | 0.70<br>7 | 3.82E-06 | 3 | Osteoblast<br>progenitor_3 |
| Toporsos  | 2.67E-10 | -0.3424427<br>85 | 0.20<br>3 | 0.39<br>5 | 3.90E-06 | 3 | Osteoblast<br>progenitor_3 |
| Tpm1      | 3.53E-10 | -0.2875726<br>95 | 0.96<br>7 | 0.98<br>5 | 5.14E-06 | 3 | Osteoblast<br>progenitor_3 |
| Rpl6l     | 3.59E-10 | 0.30624545<br>2  | 0.70<br>3 | 0.45<br>9 | 5.22E-06 | 3 | Osteoblast<br>progenitor_3 |
| Ogn       | 4.77E-10 | -0.3421565<br>34 | 0.49<br>8 | 0.71<br>2 | 6.95E-06 | 3 | Osteoblast<br>progenitor_3 |
| Eif4ebp1  | 6.08E-10 | 0.26720729<br>4  | 0.96<br>4 | 0.92<br>2 | 8.86E-06 | 3 | Osteoblast<br>progenitor_3 |
| Wisp1     | 1.26E-09 | 0.38848760<br>4  | 0.79<br>9 | 0.56<br>6 | 1.84E-05 | 3 | Osteoblast<br>progenitor_3 |
| Fgfr2     | 1.35E-09 | -0.3649796<br>6  | 0.27<br>7 | 0.47<br>3 | 1.97E-05 | 3 | Osteoblast<br>progenitor_3 |
| Cdsn      | 1.57E-09 | 0.45709252<br>1  | 0.69<br>1 | 0.49<br>3 | 2.28E-05 | 3 | Osteoblast<br>progenitor_3 |
| Bag1      | 1.68E-09 | 0.30994632<br>6  | 0.88<br>6 | 0.74<br>1 | 2.45E-05 | 3 | Osteoblast<br>progenitor_3 |

|           |               |                  |           |           |                 |   |                             |
|-----------|---------------|------------------|-----------|-----------|-----------------|---|-----------------------------|
| Romo1     | 2.14E-09      | -0.2529592<br>86 | 0.93      | 0.95<br>6 | 3.12E-05        | 3 | Osteoblast<br>progenitor_3  |
| Aplp2     | 8.96E-09      | -0.3234697<br>03 | 0.67<br>7 | 0.78<br>5 | 0.00013052<br>8 | 3 | Osteoblast<br>progenitor_3  |
| Bmp1      | 9.13E-09      | 0.30532068<br>7  | 0.63<br>8 | 0.38<br>5 | 0.00013297<br>9 | 3 | Osteoblast<br>progenitor_3  |
| Polr2l    | 1.02E-08      | -0.3543548<br>89 | 0.64<br>6 | 0.72<br>7 | 0.00014809<br>3 | 3 | Osteoblast<br>progenitor_3  |
| Fads3     | 1.14E-08      | 0.28103181<br>4  | 0.66<br>5 | 0.44<br>9 | 0.00016634<br>5 | 3 | Osteoblast<br>progenitor_3  |
| Rheb      | 2.20E-08      | 0.29659337<br>1  | 0.71<br>8 | 0.49<br>8 | 0.0003206       | 3 | Osteoblast<br>progenitor_3  |
| Pcolce    | 2.26E-08      | -0.3431554<br>87 | 0.79<br>7 | 0.90<br>2 | 0.00032864<br>9 | 3 | Osteoblast<br>progenitor_3  |
| Nip7      | 3.99E-08      | -0.6458539<br>38 | 0.38<br>3 | 0.52<br>2 | 0.00058087      | 3 | Osteoblast<br>progenitor_3  |
| Prss23    | 4.07E-08      | 0.36659136<br>1  | 0.52<br>7 | 0.29<br>8 | 0.00059348<br>1 | 3 | Osteoblast<br>progenitor_3  |
| Cxcl12    | 4.19E-08      | -0.4290773<br>88 | 0.47<br>8 | 0.62<br>9 | 0.00061000<br>3 | 3 | Osteoblast<br>progenitor_3  |
| Nisch     | 5.33E-08      | -0.3222556<br>25 | 0.60<br>6 | 0.71<br>7 | 0.00077640<br>6 | 3 | Osteoblast<br>progenitor_3  |
| Fry       | 6.28E-08      | -0.3665277<br>26 | 0.06<br>3 | 0.18<br>5 | 0.00091463<br>4 | 3 | Osteoblast<br>progenitor_3  |
| Gm9493    | 7.95E-08      | 0.28900119<br>2  | 0.64<br>2 | 0.42<br>4 | 0.00115838<br>7 | 3 | Osteoblast<br>progenitor_3  |
| Atp6v1g1  | 1.64E-07      | 0.27237932<br>1  | 0.94<br>3 | 0.86<br>3 | 0.00239403<br>6 | 3 | Osteoblast<br>progenitor_3  |
| Spp1      | 1.70E-07      | 0.55701922<br>8  | 0.88<br>8 | 0.81      | 0.00246909<br>5 | 3 | Osteoblast<br>progenitor_3  |
| Dpm3      | 1.74E-07      | -0.3079575<br>26 | 0.62<br>3 | 0.73<br>7 | 0.00253003<br>8 | 3 | Osteoblast<br>progenitor_3  |
| Tnn       | 3.70E-07      | 0.25880911<br>1  | 0.37<br>3 | 0.17<br>6 | 0.00538710<br>8 | 3 | Osteoblast<br>progenitor_3  |
| Mylk      | 4.78E-07      | -0.2755630<br>79 | 0.37<br>2 | 0.53<br>7 | 0.00695540<br>8 | 3 | Osteoblast<br>progenitor_3  |
| Gstp1     | 5.19E-07      | 0.28686989<br>7  | 0.70<br>3 | 0.52<br>2 | 0.00755886<br>7 | 3 | Osteoblast<br>progenitor_3  |
| Rps26-ps1 | 5.35E-07      | -0.2814827<br>1  | 0.39<br>2 | 0.55<br>1 | 0.00779166<br>8 | 3 | Osteoblast<br>progenitor_3  |
| Pdcd11    | 6.03E-07      | -0.2623585<br>2  | 0.19<br>1 | 0.34<br>1 | 0.00877879      | 3 | Osteoblast<br>progenitor_3  |
| Rps29     | 8.39E-10<br>8 | -0.6622924<br>42 | 1         | 1         | 1.22E-103       | 4 | Mesenchymal<br>progenitor_4 |
| Rps28     | 9.45E-10<br>1 | -0.8897621<br>42 | 0.99<br>5 | 1         | 1.38E-96        | 4 | Mesenchymal<br>progenitor_4 |
| Rpl38     | 6.62E-87      | -0.6320355<br>83 | 0.99<br>5 | 1         | 9.65E-83        | 4 | Mesenchymal<br>progenitor_4 |

|         |          |                  |           |           |          |   |                             |
|---------|----------|------------------|-----------|-----------|----------|---|-----------------------------|
| Rpl41   | 1.48E-80 | -0.4274440<br>72 | 1         | 1         | 2.16E-76 | 4 | Mesenchymal<br>progenitor_4 |
| Gm26917 | 2.47E-69 | 0.79817148<br>6  | 0.97      | 0.74<br>8 | 3.60E-65 | 4 | Mesenchymal<br>progenitor_4 |
| Gm8730  | 2.28E-66 | 0.83101334<br>5  | 0.99<br>5 | 0.95<br>6 | 3.32E-62 | 4 | Mesenchymal<br>progenitor_4 |
| Rps2    | 1.80E-60 | 0.60327663<br>9  | 1         | 0.98<br>5 | 2.62E-56 | 4 | Mesenchymal<br>progenitor_4 |
| mt-Nd2  | 3.83E-54 | -0.7273585<br>88 | 0.76<br>4 | 0.95<br>6 | 5.58E-50 | 4 | Mesenchymal<br>progenitor_4 |
| Rpl37a  | 2.15E-53 | -0.3617274<br>11 | 1         | 1         | 3.13E-49 | 4 | Mesenchymal<br>progenitor_4 |
| Gm10076 | 5.03E-52 | -0.4049639<br>06 | 1         | 1         | 7.32E-48 | 4 | Mesenchymal<br>progenitor_4 |
| Atp5k   | 4.30E-48 | -0.6583018<br>29 | 0.89<br>8 | 0.97<br>1 | 6.26E-44 | 4 | Mesenchymal<br>progenitor_4 |
| Rps27   | 4.36E-44 | -0.3869879<br>18 | 1         | 0.99<br>8 | 6.35E-40 | 4 | Mesenchymal<br>progenitor_4 |
| Rpl15   | 1.05E-42 | 0.54150254<br>5  | 0.98<br>5 | 0.91<br>5 | 1.53E-38 | 4 | Mesenchymal<br>progenitor_4 |
| lbsp    | 9.08E-42 | 1.03710931<br>9  | 0.86<br>6 | 0.40<br>8 | 1.32E-37 | 4 | Mesenchymal<br>progenitor_4 |
| Nmt1    | 2.32E-40 | -0.7806285<br>08 | 0.28<br>3 | 0.68<br>7 | 3.38E-36 | 4 | Mesenchymal<br>progenitor_4 |
| Rpl29   | 1.54E-35 | 0.61802219<br>6  | 0.84<br>4 | 0.60<br>7 | 2.24E-31 | 4 | Mesenchymal<br>progenitor_4 |
| Rps21   | 4.87E-33 | -0.4056292<br>61 | 0.97      | 0.99<br>3 | 7.10E-29 | 4 | Mesenchymal<br>progenitor_4 |
| Sec61g  | 8.44E-33 | -0.3396237<br>94 | 0.99<br>3 | 0.98<br>3 | 1.23E-28 | 4 | Mesenchymal<br>progenitor_4 |
| Rpl13   | 1.81E-32 | 0.29629147<br>5  | 1         | 0.99<br>5 | 2.64E-28 | 4 | Mesenchymal<br>progenitor_4 |
| Gm10260 | 6.97E-32 | 0.40317693<br>8  | 0.99<br>8 | 0.98<br>1 | 1.02E-27 | 4 | Mesenchymal<br>progenitor_4 |
| Rplp0   | 1.01E-31 | 0.46556105<br>8  | 0.99<br>8 | 0.98<br>1 | 1.47E-27 | 4 | Mesenchymal<br>progenitor_4 |
| Eif2s2  | 9.41E-31 | -0.4943824<br>48 | 0.91<br>8 | 0.95<br>6 | 1.37E-26 | 4 | Mesenchymal<br>progenitor_4 |
| Rps18   | 1.37E-29 | 0.35573348<br>8  | 1         | 0.99<br>5 | 1.99E-25 | 4 | Mesenchymal<br>progenitor_4 |
| Nme2    | 6.54E-29 | 0.61923657<br>8  | 0.7       | 0.38<br>6 | 9.52E-25 | 4 | Mesenchymal<br>progenitor_4 |
| Rps6    | 2.14E-28 | 0.33215686<br>7  | 1         | 0.99      | 3.12E-24 | 4 | Mesenchymal<br>progenitor_4 |
| Ftl1    | 1.80E-27 | 0.37000044<br>1  | 1         | 0.99<br>5 | 2.62E-23 | 4 | Mesenchymal<br>progenitor_4 |
| Rpl39   | 4.32E-27 | -0.3733075<br>91 | 0.99<br>5 | 0.99<br>8 | 6.29E-23 | 4 | Mesenchymal<br>progenitor_4 |

|          |          |                  |           |           |          |   |                             |
|----------|----------|------------------|-----------|-----------|----------|---|-----------------------------|
| Rps7     | 6.91E-27 | 0.35816245<br>5  | 0.99<br>3 | 0.97<br>6 | 1.01E-22 | 4 | Mesenchymal<br>progenitor_4 |
| Gm10709  | 1.02E-26 | 0.41688899<br>5  | 0.97      | 0.86<br>9 | 1.48E-22 | 4 | Mesenchymal<br>progenitor_4 |
| Rpl9     | 2.68E-26 | 0.30679369<br>1  | 0.99<br>8 | 0.98<br>3 | 3.90E-22 | 4 | Mesenchymal<br>progenitor_4 |
| Ndufa3   | 3.17E-26 | -0.4640232<br>14 | 0.82<br>4 | 0.90<br>8 | 4.62E-22 | 4 | Mesenchymal<br>progenitor_4 |
| Rpl36    | 8.12E-26 | -0.2963169<br>5  | 0.99<br>8 | 0.99<br>5 | 1.18E-21 | 4 | Mesenchymal<br>progenitor_4 |
| Lmo4     | 2.40E-24 | -0.6189108<br>24 | 0.46<br>9 | 0.72<br>6 | 3.50E-20 | 4 | Mesenchymal<br>progenitor_4 |
| Rpl10    | 3.68E-23 | 0.35036097       | 0.99      | 0.98<br>1 | 5.35E-19 | 4 | Mesenchymal<br>progenitor_4 |
| Rps5     | 4.07E-22 | 0.30337278<br>1  | 1         | 0.99<br>5 | 5.92E-18 | 4 | Mesenchymal<br>progenitor_4 |
| Malat1   | 4.22E-20 | -0.4903269<br>99 | 1         | 1         | 6.14E-16 | 4 | Mesenchymal<br>progenitor_4 |
| Psap     | 5.83E-20 | -0.5114610<br>36 | 0.81<br>1 | 0.93<br>4 | 8.49E-16 | 4 | Mesenchymal<br>progenitor_4 |
| Snhg9    | 8.81E-20 | -0.4801851<br>97 | 0.09<br>9 | 0.35<br>7 | 1.28E-15 | 4 | Mesenchymal<br>progenitor_4 |
| Calr     | 3.10E-19 | 0.45670719       | 0.89<br>6 | 0.71<br>6 | 4.51E-15 | 4 | Mesenchymal<br>progenitor_4 |
| Igkc     | 3.52E-19 | 1.58900734<br>9  | 0.42<br>2 | 0.14<br>6 | 5.13E-15 | 4 | Mesenchymal<br>progenitor_4 |
| Ppp1r14b | 4.63E-19 | 0.38561206<br>6  | 0.90<br>3 | 0.75<br>7 | 6.74E-15 | 4 | Mesenchymal<br>progenitor_4 |
| Gm10020  | 1.23E-18 | 0.45136068<br>5  | 0.56<br>6 | 0.29<br>6 | 1.80E-14 | 4 | Mesenchymal<br>progenitor_4 |
| Grn      | 2.21E-18 | -0.4988850<br>08 | 0.35<br>7 | 0.63<br>3 | 3.21E-14 | 4 | Mesenchymal<br>progenitor_4 |
| mt-Nd3   | 5.30E-18 | -0.5081481<br>4  | 0.21<br>1 | 0.46<br>6 | 7.73E-14 | 4 | Mesenchymal<br>progenitor_4 |
| Dync1i2  | 1.25E-17 | -0.4973473<br>03 | 0.42<br>9 | 0.65<br>3 | 1.82E-13 | 4 | Mesenchymal<br>progenitor_4 |
| Gm10263  | 1.62E-17 | -0.3859656<br>8  | 0.03<br>2 | 0.23<br>5 | 2.36E-13 | 4 | Mesenchymal<br>progenitor_4 |
| Fos      | 2.19E-17 | -0.5750617<br>25 | 0.40<br>9 | 0.65<br>3 | 3.19E-13 | 4 | Mesenchymal<br>progenitor_4 |
| Rpl4     | 2.49E-17 | 0.33786304<br>5  | 0.99<br>8 | 0.96<br>1 | 3.63E-13 | 4 | Mesenchymal<br>progenitor_4 |
| Snrpg    | 4.31E-17 | -0.3051450<br>17 | 0.90<br>8 | 0.93<br>9 | 6.28E-13 | 4 | Mesenchymal<br>progenitor_4 |
| MyI9     | 1.64E-16 | -0.4317804<br>34 | 0.90<br>8 | 0.94<br>7 | 2.39E-12 | 4 | Mesenchymal<br>progenitor_4 |
| Rpl17    | 2.22E-16 | 0.26416054<br>2  | 0.99<br>8 | 0.97<br>1 | 3.23E-12 | 4 | Mesenchymal<br>progenitor_4 |

|                   |          |                  |           |           |          |   |                             |
|-------------------|----------|------------------|-----------|-----------|----------|---|-----------------------------|
| Pabpc1            | 2.50E-16 | 0.37940984<br>4  | 0.91<br>8 | 0.84      | 3.65E-12 | 4 | Mesenchymal<br>progenitor_4 |
| Rpl3              | 3.68E-16 | 0.27980456       | 0.99<br>8 | 0.98<br>3 | 5.35E-12 | 4 | Mesenchymal<br>progenitor_4 |
| Sertad2           | 3.28E-15 | -0.4958697<br>39 | 0.37<br>2 | 0.56<br>1 | 4.77E-11 | 4 | Mesenchymal<br>progenitor_4 |
| Rpl18a            | 6.07E-15 | 0.26130306<br>8  | 1         | 1         | 8.85E-11 | 4 | Mesenchymal<br>progenitor_4 |
| Ybx1              | 7.37E-15 | 0.25788635       | 0.99<br>3 | 0.96<br>4 | 1.07E-10 | 4 | Mesenchymal<br>progenitor_4 |
| Polr2l            | 1.41E-14 | -0.4363675<br>84 | 0.58<br>1 | 0.71<br>6 | 2.05E-10 | 4 | Mesenchymal<br>progenitor_4 |
| Arpc1b            | 1.77E-14 | 0.31734158<br>1  | 0.95<br>5 | 0.83<br>5 | 2.58E-10 | 4 | Mesenchymal<br>progenitor_4 |
| Hes1              | 3.29E-14 | -0.5510638<br>96 | 0.47<br>6 | 0.63<br>6 | 4.80E-10 | 4 | Mesenchymal<br>progenitor_4 |
| Myeov2            | 5.09E-14 | -0.3184288<br>89 | 0.86<br>4 | 0.91<br>3 | 7.42E-10 | 4 | Mesenchymal<br>progenitor_4 |
| Usmg5             | 6.10E-14 | -0.3610608<br>02 | 0.79<br>2 | 0.84<br>7 | 8.89E-10 | 4 | Mesenchymal<br>progenitor_4 |
| Ptrf              | 7.86E-14 | -0.4472857<br>5  | 0.77<br>7 | 0.87<br>6 | 1.14E-09 | 4 | Mesenchymal<br>progenitor_4 |
| 2010107E04<br>Rik | 1.10E-13 | -0.3712519       | 0.72<br>5 | 0.82<br>8 | 1.60E-09 | 4 | Mesenchymal<br>progenitor_4 |
| Naca              | 1.94E-13 | 0.25280127<br>2  | 0.96<br>8 | 0.91<br>3 | 2.83E-09 | 4 | Mesenchymal<br>progenitor_4 |
| Eef1g             | 4.73E-13 | 0.26182348       | 0.98      | 0.94<br>7 | 6.89E-09 | 4 | Mesenchymal<br>progenitor_4 |
| Eif4ebp1          | 5.24E-13 | 0.31732312<br>2  | 0.92<br>6 | 0.78<br>4 | 7.64E-09 | 4 | Mesenchymal<br>progenitor_4 |
| Rpl6l             | 5.69E-13 | 0.33235942<br>6  | 0.49<br>4 | 0.25<br>5 | 8.29E-09 | 4 | Mesenchymal<br>progenitor_4 |
| Nisch             | 6.07E-13 | -0.4413611<br>98 | 0.53<br>6 | 0.69<br>4 | 8.84E-09 | 4 | Mesenchymal<br>progenitor_4 |
| Apoe              | 2.46E-12 | -0.3735586<br>55 | 0.13<br>2 | 0.34      | 3.58E-08 | 4 | Mesenchymal<br>progenitor_4 |
| Crip1             | 2.57E-12 | -0.3710628<br>68 | 0.94      | 0.95<br>1 | 3.74E-08 | 4 | Mesenchymal<br>progenitor_4 |
| Acta2             | 2.76E-12 | -0.3512243<br>05 | 0.99      | 0.98<br>8 | 4.01E-08 | 4 | Mesenchymal<br>progenitor_4 |
| Timp1             | 4.36E-12 | 0.34096815<br>3  | 0.94<br>8 | 0.86<br>7 | 6.36E-08 | 4 | Mesenchymal<br>progenitor_4 |
| Gm10116           | 4.57E-12 | 0.31337064<br>6  | 0.65<br>8 | 0.42<br>5 | 6.66E-08 | 4 | Mesenchymal<br>progenitor_4 |
| Dstn              | 5.65E-12 | -0.3314314<br>09 | 0.89<br>3 | 0.92      | 8.23E-08 | 4 | Mesenchymal<br>progenitor_4 |
| Atp5g1            | 6.32E-12 | 0.27181147<br>1  | 0.93<br>8 | 0.88<br>1 | 9.20E-08 | 4 | Mesenchymal<br>progenitor_4 |



|           |          |                  |           |           |                 |   |                             |
|-----------|----------|------------------|-----------|-----------|-----------------|---|-----------------------------|
| Ogn       | 7.97E-12 | -0.4320890<br>1  | 0.51<br>9 | 0.67<br>7 | 1.16E-07        | 4 | Mesenchymal<br>progenitor_4 |
| Snhg18    | 9.49E-12 | -0.3847687<br>14 | 0.38<br>2 | 0.56<br>6 | 1.38E-07        | 4 | Mesenchymal<br>progenitor_4 |
| Rps27rt   | 1.37E-11 | -0.3728943<br>04 | 0.27<br>3 | 0.47<br>6 | 2.00E-07        | 4 | Mesenchymal<br>progenitor_4 |
| Usp50     | 2.40E-11 | -0.3042892<br>51 | 0.74<br>4 | 0.82<br>8 | 3.49E-07        | 4 | Mesenchymal<br>progenitor_4 |
| Egr1      | 5.59E-11 | -0.3914171<br>58 | 0.37      | 0.55<br>8 | 8.15E-07        | 4 | Mesenchymal<br>progenitor_4 |
| Tnfrsf12a | 6.92E-11 | 0.31968161<br>2  | 0.61      | 0.39<br>6 | 1.01E-06        | 4 | Mesenchymal<br>progenitor_4 |
| Nhp2      | 7.24E-11 | 0.34427442<br>7  | 0.72      | 0.55<br>3 | 1.05E-06        | 4 | Mesenchymal<br>progenitor_4 |
| Pgk1      | 1.79E-10 | 0.30305452<br>5  | 0.68<br>7 | 0.46<br>1 | 2.60E-06        | 4 | Mesenchymal<br>progenitor_4 |
| Romo1     | 1.80E-10 | -0.2703555<br>13 | 0.91<br>6 | 0.90<br>8 | 2.63E-06        | 4 | Mesenchymal<br>progenitor_4 |
| Slpi      | 2.44E-10 | 0.61503744<br>7  | 0.16<br>4 | 0.03<br>2 | 3.55E-06        | 4 | Mesenchymal<br>progenitor_4 |
| Npm1      | 2.87E-10 | 0.31548792<br>1  | 0.94<br>3 | 0.87<br>9 | 4.18E-06        | 4 | Mesenchymal<br>progenitor_4 |
| Mylk      | 3.87E-10 | -0.4532192<br>54 | 0.68<br>5 | 0.81<br>1 | 5.64E-06        | 4 | Mesenchymal<br>progenitor_4 |
| Tomm22    | 8.25E-10 | 0.28859551<br>4  | 0.68<br>7 | 0.50<br>2 | 1.20E-05        | 4 | Mesenchymal<br>progenitor_4 |
| Jchain    | 1.05E-09 | 0.73432083<br>9  | 0.11<br>2 | 0.01      | 1.53E-05        | 4 | Mesenchymal<br>progenitor_4 |
| Gm10073   | 1.38E-09 | -0.2852578<br>54 | 0.73<br>7 | 0.80<br>6 | 2.01E-05        | 4 | Mesenchymal<br>progenitor_4 |
| Srm       | 2.43E-09 | 0.28011171<br>4  | 0.53<br>1 | 0.32<br>3 | 3.54E-05        | 4 | Mesenchymal<br>progenitor_4 |
| Myh9      | 2.85E-09 | -0.3179282<br>19 | 0.69      | 0.80<br>1 | 4.15E-05        | 4 | Mesenchymal<br>progenitor_4 |
| Wisp1     | 4.14E-09 | 0.35810126<br>3  | 0.73<br>4 | 0.56<br>8 | 6.04E-05        | 4 | Mesenchymal<br>progenitor_4 |
| Ephx1     | 5.08E-09 | -0.3263206<br>1  | 0.17      | 0.33<br>7 | 7.40E-05        | 4 | Mesenchymal<br>progenitor_4 |
| Gm10036   | 8.03E-09 | 0.25412405<br>2  | 0.68      | 0.47<br>1 | 0.00011688<br>4 | 4 | Mesenchymal<br>progenitor_4 |
| Col8a1    | 1.38E-08 | -0.2961609<br>54 | 0.95<br>5 | 0.95<br>4 | 0.00020104<br>9 | 4 | Mesenchymal<br>progenitor_4 |
| Timp2     | 1.41E-08 | -0.2881805<br>83 | 0.90<br>1 | 0.90<br>3 | 0.00020577<br>8 | 4 | Mesenchymal<br>progenitor_4 |
| Pttg1     | 2.67E-08 | 0.33362558<br>4  | 0.71<br>5 | 0.57<br>5 | 0.00038956<br>2 | 4 | Mesenchymal<br>progenitor_4 |
| Hspe1     | 3.46E-08 | 0.25047090<br>8  | 0.87<br>6 | 0.77<br>2 | 0.00050445<br>7 | 4 | Mesenchymal<br>progenitor_4 |

|         |          |                  |           |           |                      |   |                             |
|---------|----------|------------------|-----------|-----------|----------------------|---|-----------------------------|
| Gm8186  | 3.67E-08 | -0.3271774<br>16 | 0.47<br>1 | 0.59<br>5 | 0.00053429<br>4      | 4 | Mesenchymal<br>progenitor_4 |
| C1qbp   | 4.49E-08 | 0.27731955<br>1  | 0.51<br>1 | 0.32<br>5 | 0.00065332<br>5      | 4 | Mesenchymal<br>progenitor_4 |
| Tnrc6a  | 5.54E-08 | -0.2973509<br>51 | 0.4<br>1  | 0.54<br>1 | 0.00080649<br>3      | 4 | Mesenchymal<br>progenitor_4 |
| Gm9493  | 6.29E-08 | 0.27653935<br>6  | 0.45<br>2 | 0.29<br>6 | 0.00091563<br>1      | 4 | Mesenchymal<br>progenitor_4 |
| Lasp1   | 6.35E-08 | -0.3590265<br>28 | 0.61<br>5 | 0.69<br>9 | 0.00092479<br>2      | 4 | Mesenchymal<br>progenitor_4 |
| Sgol1   | 6.71E-08 | -0.3586298<br>32 | 0.21<br>6 | 0.36<br>2 | 0.00097774<br>6      | 4 | Mesenchymal<br>progenitor_4 |
| Ssbp3   | 7.43E-08 | -0.3383308<br>24 | 0.27<br>1 | 0.42<br>1 | 0.00108236<br>1      | 4 | Mesenchymal<br>progenitor_4 |
| Gadd45g | 8.58E-08 | 0.36172923<br>4  | 0.67<br>1 | 0.50<br>7 | 0.00124947<br>6      | 4 | Mesenchymal<br>progenitor_4 |
| Lockd   | 1.05E-07 | -0.3090224<br>65 | 0.72<br>7 | 0.78<br>4 | 0.00152950<br>9      | 4 | Mesenchymal<br>progenitor_4 |
| Aspn    | 1.13E-07 | -0.4009197<br>03 | 0.11<br>2 | 0.24<br>8 | 0.00163848<br>8      | 4 | Mesenchymal<br>progenitor_4 |
| Fads3   | 1.52E-07 | 0.25879682<br>1  | 0.58<br>3 | 0.42<br>7 | 0.00220913<br>3      | 4 | Mesenchymal<br>progenitor_4 |
| Anapc13 | 1.72E-07 | -0.2939357<br>45 | 0.64<br>5 | 0.70<br>9 | 0.00250813<br>9      | 4 | Mesenchymal<br>progenitor_4 |
| Tubb4b  | 2.03E-07 | -0.2591618<br>96 | 0.81<br>6 | 0.85<br>4 | 0.00295309<br>1      | 4 | Mesenchymal<br>progenitor_4 |
| Cnbp    | 2.04E-07 | 0.25664568<br>9  | 0.74<br>4 | 0.62<br>6 | 0.00297428<br>9      | 4 | Mesenchymal<br>progenitor_4 |
| Olfml3  | 2.66E-07 | -0.3089958<br>56 | 0.45<br>4 | 0.56<br>6 | 0.00387281<br>6      | 4 | Mesenchymal<br>progenitor_4 |
| Larp7   | 4.43E-07 | -0.2830663<br>19 | 0.26<br>3 | 0.40<br>8 | 0.00645105<br>2      | 4 | Mesenchymal<br>progenitor_4 |
| Maged1  | 4.73E-07 | -0.2560783<br>64 | 0.60<br>8 | 0.72<br>6 | 0.00688624<br>4      | 4 | Mesenchymal<br>progenitor_4 |
| Glr5    | 4.77E-07 | 0.27561105<br>1  | 0.71<br>7 | 0.57<br>1 | 0.00694492<br>2      | 4 | Mesenchymal<br>progenitor_4 |
| Rps29   | 8.84E-99 | -0.6468323<br>55 | 1<br>1    | 1<br>1    | 1.29E-94<br>1.29E-94 | 5 | Mesenchymal<br>progenitor_5 |
| Rps28   | 1.21E-88 | -0.8586567<br>55 | 1<br>1    | 1<br>1    | 1.77E-84<br>1.77E-84 | 5 | Mesenchymal<br>progenitor_5 |
| Rpl41   | 6.38E-80 | -0.4371512<br>45 | 1<br>1    | 1<br>1    | 9.29E-76<br>9.29E-76 | 5 | Mesenchymal<br>progenitor_5 |
| Rpl38   | 1.26E-67 | -0.5523716<br>01 | 0.99<br>7 | 1<br>1    | 1.84E-63<br>1.84E-63 | 5 | Mesenchymal<br>progenitor_5 |
| Gm8730  | 1.40E-61 | 0.81095083<br>9  | 0.99<br>5 | 0.97<br>3 | 2.04E-57<br>2.04E-57 | 5 | Mesenchymal<br>progenitor_5 |
| Gm26917 | 1.70E-58 | 0.74852820<br>2  | 0.96<br>7 | 0.77<br>5 | 2.47E-54<br>2.47E-54 | 5 | Mesenchymal<br>progenitor_5 |

|         |          |                  |           |           |          |   |                             |
|---------|----------|------------------|-----------|-----------|----------|---|-----------------------------|
| Rps2    | 9.75E-52 | 0.53396317<br>7  | 1         | 0.99<br>1 | 1.42E-47 | 5 | Mesenchymal<br>progenitor_5 |
| Gm10076 | 1.26E-46 | -0.3811822<br>97 | 1         | 0.99<br>7 | 1.84E-42 | 5 | Mesenchymal<br>progenitor_5 |
| Rps27   | 3.73E-45 | -0.4130416<br>45 | 0.99<br>7 | 0.99<br>7 | 5.43E-41 | 5 | Mesenchymal<br>progenitor_5 |
| Malat1  | 3.06E-43 | -0.6572007<br>6  | 1         | 1         | 4.45E-39 | 5 | Mesenchymal<br>progenitor_5 |
| Rpl36   | 4.58E-38 | -0.3664840<br>84 | 0.99<br>7 | 1         | 6.66E-34 | 5 | Mesenchymal<br>progenitor_5 |
| Rpl15   | 5.69E-38 | 0.57668016<br>4  | 0.97<br>7 | 0.91<br>6 | 8.28E-34 | 5 | Mesenchymal<br>progenitor_5 |
| Snhg9   | 7.06E-38 | -0.7151989<br>59 | 0.07<br>7 | 0.48<br>6 | 1.03E-33 | 5 | Mesenchymal<br>progenitor_5 |
| Rpl37a  | 1.39E-36 | -0.2657547<br>72 | 1         | 1         | 2.02E-32 | 5 | Mesenchymal<br>progenitor_5 |
| mt-Nd2  | 2.11E-36 | -0.6086833<br>73 | 0.82<br>9 | 0.95<br>2 | 3.07E-32 | 5 | Mesenchymal<br>progenitor_5 |
| Nme2    | 1.55E-32 | 0.68270689<br>5  | 0.71<br>4 | 0.33<br>9 | 2.26E-28 | 5 | Mesenchymal<br>progenitor_5 |
| Nmt1    | 2.99E-31 | -0.6713003<br>6  | 0.27<br>6 | 0.66<br>1 | 4.35E-27 | 5 | Mesenchymal<br>progenitor_5 |
| Atp5k   | 7.66E-31 | -0.5101673<br>75 | 0.90<br>6 | 0.97<br>3 | 1.12E-26 | 5 | Mesenchymal<br>progenitor_5 |
| Calr    | 3.10E-25 | 0.53884734<br>2  | 0.92<br>3 | 0.73<br>3 | 4.52E-21 | 5 | Mesenchymal<br>progenitor_5 |
| Gm10260 | 1.32E-24 | 0.35037907<br>7  | 0.99<br>7 | 0.99<br>1 | 1.92E-20 | 5 | Mesenchymal<br>progenitor_5 |
| Rplp0   | 1.65E-24 | 0.39929282<br>2  | 0.99<br>2 | 0.99<br>4 | 2.40E-20 | 5 | Mesenchymal<br>progenitor_5 |
| Rpl10   | 1.62E-23 | 0.35672413<br>3  | 0.99<br>2 | 0.97<br>3 | 2.35E-19 | 5 | Mesenchymal<br>progenitor_5 |
| Rpl29   | 2.44E-23 | 0.50195284<br>7  | 0.86<br>7 | 0.70<br>3 | 3.55E-19 | 5 | Mesenchymal<br>progenitor_5 |
| Eif2s2  | 3.82E-23 | -0.4317483<br>57 | 0.89<br>8 | 0.97<br>6 | 5.56E-19 | 5 | Mesenchymal<br>progenitor_5 |
| Sertad2 | 4.98E-23 | -0.5757695<br>45 | 0.33<br>4 | 0.63<br>1 | 7.25E-19 | 5 | Mesenchymal<br>progenitor_5 |
| Rps18   | 5.78E-23 | 0.30714212<br>1  | 1<br>1    | 0.99<br>7 | 8.42E-19 | 5 | Mesenchymal<br>progenitor_5 |
| Rpl39   | 2.62E-21 | -0.3483538<br>27 | 1         | 0.99<br>1 | 3.82E-17 | 5 | Mesenchymal<br>progenitor_5 |
| lbsp    | 2.63E-21 | 0.73217720<br>5  | 0.82<br>1 | 0.47<br>7 | 3.83E-17 | 5 | Mesenchymal<br>progenitor_5 |
| Rps21   | 1.67E-20 | -0.3248389<br>21 | 0.98<br>5 | 0.99<br>4 | 2.43E-16 | 5 | Mesenchymal<br>progenitor_5 |
| Ndufa3  | 4.04E-20 | -0.4474266<br>39 | 0.83<br>9 | 0.91<br>3 | 5.88E-16 | 5 | Mesenchymal<br>progenitor_5 |

|                   |          |                  |           |           |          |   |                             |
|-------------------|----------|------------------|-----------|-----------|----------|---|-----------------------------|
| Polr2l            | 6.66E-19 | -0.4807968<br>73 | 0.56<br>6 | 0.79      | 9.69E-15 | 5 | Mesenchymal<br>progenitor_5 |
| Sec61g            | 2.70E-17 | -0.2600269<br>2  | 0.99<br>5 | 0.98<br>8 | 3.94E-13 | 5 | Mesenchymal<br>progenitor_5 |
| Lmo4              | 2.90E-17 | -0.5036774<br>76 | 0.48<br>2 | 0.73<br>3 | 4.22E-13 | 5 | Mesenchymal<br>progenitor_5 |
| Rpl9              | 3.85E-17 | 0.25746369       | 1         | 0.98<br>8 | 5.61E-13 | 5 | Mesenchymal<br>progenitor_5 |
| Rps7              | 3.64E-16 | 0.28900142<br>2  | 0.99<br>2 | 0.98<br>8 | 5.31E-12 | 5 | Mesenchymal<br>progenitor_5 |
| Ftl1              | 6.94E-16 | 0.28720095<br>9  | 1         | 1         | 1.01E-11 | 5 | Mesenchymal<br>progenitor_5 |
| Rps6              | 1.23E-15 | 0.26686267<br>7  | 0.99<br>5 | 0.99<br>4 | 1.80E-11 | 5 | Mesenchymal<br>progenitor_5 |
| Rps5              | 1.26E-15 | 0.26802593<br>6  | 1         | 1         | 1.83E-11 | 5 | Mesenchymal<br>progenitor_5 |
| Timp1             | 2.47E-15 | 0.46790291<br>7  | 0.95<br>2 | 0.84<br>1 | 3.60E-11 | 5 | Mesenchymal<br>progenitor_5 |
| Psap              | 3.14E-15 | -0.3991435<br>88 | 0.86<br>7 | 0.93<br>1 | 4.57E-11 | 5 | Mesenchymal<br>progenitor_5 |
| Igkc              | 3.86E-15 | 0.38751371<br>4  | 0.41<br>1 | 0.15      | 5.62E-11 | 5 | Mesenchymal<br>progenitor_5 |
| Hes1              | 1.24E-14 | -0.5702410<br>82 | 0.46<br>7 | 0.67      | 1.81E-10 | 5 | Mesenchymal<br>progenitor_5 |
| Gm10020           | 2.34E-14 | 0.39813722<br>5  | 0.57<br>7 | 0.31<br>5 | 3.41E-10 | 5 | Mesenchymal<br>progenitor_5 |
| Eif4ebp1          | 3.95E-14 | 0.33927752<br>5  | 0.93<br>4 | 0.82<br>6 | 5.75E-10 | 5 | Mesenchymal<br>progenitor_5 |
| 2010107E04<br>Rik | 3.96E-14 | -0.3678058<br>78 | 0.67<br>9 | 0.82      | 5.77E-10 | 5 | Mesenchymal<br>progenitor_5 |
| Actn4             | 4.20E-14 | -0.3619150<br>92 | 0.81<br>9 | 0.89<br>8 | 6.12E-10 | 5 | Mesenchymal<br>progenitor_5 |
| Gm10263           | 4.77E-14 | -0.2962258<br>02 | 0.04<br>1 | 0.23<br>1 | 6.95E-10 | 5 | Mesenchymal<br>progenitor_5 |
| Ybx1              | 2.27E-13 | 0.25260403<br>8  | 0.99<br>2 | 0.97<br>9 | 3.31E-09 | 5 | Mesenchymal<br>progenitor_5 |
| Dstn              | 6.33E-13 | -0.3671582<br>04 | 0.90<br>8 | 0.94<br>3 | 9.22E-09 | 5 | Mesenchymal<br>progenitor_5 |
| Myl9              | 6.67E-13 | -0.3818597<br>45 | 0.90<br>6 | 0.95<br>8 | 9.71E-09 | 5 | Mesenchymal<br>progenitor_5 |
| Fos               | 9.33E-13 | -0.5726957       | 0.52<br>3 | 0.72<br>4 | 1.36E-08 | 5 | Mesenchymal<br>progenitor_5 |
| mt-Nd3            | 1.23E-12 | -0.4184729<br>46 | 0.28<br>1 | 0.52      | 1.80E-08 | 5 | Mesenchymal<br>progenitor_5 |
| Usmg5             | 3.09E-12 | -0.3367726<br>75 | 0.79<br>3 | 0.88      | 4.50E-08 | 5 | Mesenchymal<br>progenitor_5 |
| Usp50             | 3.33E-12 | -0.3245937<br>91 | 0.72<br>4 | 0.84<br>7 | 4.85E-08 | 5 | Mesenchymal<br>progenitor_5 |

|          |          |            |      |      |            |   |                          |
|----------|----------|------------|------|------|------------|---|--------------------------|
| Nupr1    | 4.04E-12 | 0.39875655 | 0.93 | 0.83 | 5.88E-08   | 5 | Mesenchymal progenitor_5 |
| Grn      | 4.83E-12 | -0.4001232 | 0.37 | 0.59 | 7.04E-08   | 5 | Mesenchymal progenitor_5 |
| Rpl3     | 1.38E-11 | 0.25974402 | 0.99 | 0.98 | 2.02E-07   | 5 | Mesenchymal progenitor_5 |
| Myeov2   | 1.83E-11 | -0.3155773 | 0.88 | 0.91 | 2.66E-07   | 5 | Mesenchymal progenitor_5 |
| Pet100   | 2.40E-11 | -0.3583638 | 0.30 | 0.52 | 3.49E-07   | 5 | Mesenchymal progenitor_5 |
| Erh      | 3.27E-11 | 0.30211182 | 0.92 | 0.84 | 4.76E-07   | 5 | Mesenchymal progenitor_5 |
| Gm8186   | 4.29E-11 | -0.3566947 | 0.42 | 0.61 | 6.25E-07   | 5 | Mesenchymal progenitor_5 |
| Dync1i2  | 5.10E-11 | -0.3419765 | 0.36 | 0.57 | 7.43E-07   | 5 | Mesenchymal progenitor_5 |
| Dmpk     | 5.98E-11 | -0.3084362 | 0.09 | 0.27 | 8.70E-07   | 5 | Mesenchymal progenitor_5 |
| Ppp1r14b | 2.32E-10 | 0.29907639 | 0.87 | 0.75 | 3.38E-06   | 5 | Mesenchymal progenitor_5 |
| Pgk1     | 3.98E-10 | 0.35477518 | 0.62 | 0.42 | 5.80E-06   | 5 | Mesenchymal progenitor_5 |
| Romo1    | 4.57E-10 | -0.2539858 | 0.90 | 0.96 | 6.65E-06   | 5 | Mesenchymal progenitor_5 |
| Npm1     | 7.21E-10 | 0.26137678 | 0.96 | 0.94 | 1.05E-05   | 5 | Mesenchymal progenitor_5 |
| Ptrf     | 8.41E-10 | -0.3168593 | 0.74 | 0.88 | 1.22E-05   | 5 | Mesenchymal progenitor_5 |
| Crip1    | 1.03E-09 | -0.3280309 | 0.93 | 0.96 | 1.50E-05   | 5 | Mesenchymal progenitor_5 |
| Hk2      | 1.06E-09 | -0.3124920 | 0.11 | 0.28 | 1.55E-05   | 5 | Mesenchymal progenitor_5 |
| Gm10073  | 1.70E-09 | -0.2911359 | 0.75 | 0.84 | 2.48E-05   | 5 | Mesenchymal progenitor_5 |
| Pdia3    | 1.80E-09 | 0.31688782 | 0.47 | 0.28 | 2.62E-05   | 5 | Mesenchymal progenitor_5 |
| Tomm7    | 2.72E-09 | -0.2760129 | 0.76 | 0.83 | 3.97E-05   | 5 | Mesenchymal progenitor_5 |
| Pam      | 3.58E-09 | -0.3246810 | 0.37 | 0.57 | 5.21E-05   | 5 | Mesenchymal progenitor_5 |
| Nisch    | 5.95E-09 | -0.3176103 | 0.51 | 0.68 | 8.67E-05   | 5 | Mesenchymal progenitor_5 |
| Snhg18   | 1.09E-08 | -0.3270166 | 0.50 | 0.64 | 0.00015883 | 5 | Mesenchymal progenitor_5 |
| Gm10116  | 1.32E-08 | 0.30329277 | 0.59 | 0.39 | 0.00019255 | 5 | Mesenchymal progenitor_5 |
| Rps27rt  | 2.13E-08 | -0.3422877 | 0.33 | 0.49 | 0.00031077 | 5 | Mesenchymal progenitor_5 |

|          |          |                  |              |           |                 |   |                             |
|----------|----------|------------------|--------------|-----------|-----------------|---|-----------------------------|
| Timm13   | 4.82E-08 | 0.25396212       | 0.91<br>3    | 0.79<br>9 | 0.00070203<br>1 | 5 | Mesenchymal<br>progenitor_5 |
| Ogn      | 5.34E-08 | -0.3939702<br>24 | 0.54<br>3    | 0.68<br>5 | 0.00077774<br>5 | 5 | Mesenchymal<br>progenitor_5 |
| Sap18    | 6.70E-08 | 0.26927437<br>7  | 0.72<br>2    | 0.52<br>6 | 0.00097637<br>5 | 5 | Mesenchymal<br>progenitor_5 |
| Flna     | 7.01E-08 | -0.2535229       | 0.91<br>8    | 0.96<br>4 | 0.00102103<br>7 | 5 | Mesenchymal<br>progenitor_5 |
| Eif3k    | 8.09E-08 | 0.26068059<br>6  | 0.86<br>5    | 0.77<br>5 | 0.00117865<br>6 | 5 | Mesenchymal<br>progenitor_5 |
| Timm17a  | 1.71E-07 | 0.26117317<br>3  | 0.66<br>3    | 0.46<br>2 | 0.00249135<br>5 | 5 | Mesenchymal<br>progenitor_5 |
| Toporsos | 1.77E-07 | -0.2502058<br>11 | 0.20<br>7    | 0.37<br>2 | 0.00258063<br>4 | 5 | Mesenchymal<br>progenitor_5 |
| Egr1     | 1.97E-07 | -0.3378587<br>47 | 0.39<br>3    | 0.56<br>5 | 0.00287308<br>6 | 5 | Mesenchymal<br>progenitor_5 |
| Mylk     | 3.61E-07 | -0.3227993<br>36 | 0.77<br>0.77 | 0.83<br>5 | 0.00525203<br>4 | 5 | Mesenchymal<br>progenitor_5 |
| Rps29    | 4.16E-76 | -0.6331661<br>05 | 0.99<br>7    | 1         | 6.05E-72        | 6 | Mesenchymal<br>progenitor_6 |
| Rps28    | 8.45E-63 | -0.7737002<br>62 | 0.98<br>7    | 0.99<br>3 | 1.23E-58        | 6 | Mesenchymal<br>progenitor_6 |
| Gm8730   | 1.31E-60 | 0.82798663<br>8  | 0.99<br>7    | 0.93      | 1.91E-56        | 6 | Mesenchymal<br>progenitor_6 |
| Rps2     | 9.31E-55 | 0.66362422<br>2  | 0.99<br>7    | 0.97<br>4 | 1.36E-50        | 6 | Mesenchymal<br>progenitor_6 |
| Rpl38    | 4.17E-48 | -0.5573345<br>33 | 0.99<br>1    | 0.99<br>6 | 6.07E-44        | 6 | Mesenchymal<br>progenitor_6 |
| Gm26917  | 4.87E-40 | 0.79878799<br>2  | 0.91<br>7    | 0.53<br>3 | 7.09E-36        | 6 | Mesenchymal<br>progenitor_6 |
| Rps27    | 1.18E-39 | -0.4251116<br>46 | 0.99<br>7    | 1         | 1.72E-35        | 6 | Mesenchymal<br>progenitor_6 |
| Rpl15    | 2.01E-35 | 0.58419383<br>5  | 0.98<br>7    | 0.83<br>7 | 2.93E-31        | 6 | Mesenchymal<br>progenitor_6 |
| Rplp0    | 2.52E-34 | 0.48070897<br>8  | 0.99<br>7    | 0.96<br>7 | 3.66E-30        | 6 | Mesenchymal<br>progenitor_6 |
| Rpl41    | 1.04E-33 | -0.3535220<br>29 | 1            | 1         | 1.51E-29        | 6 | Mesenchymal<br>progenitor_6 |
| Rps18    | 1.58E-32 | 0.43459884<br>2  | 1            | 0.98<br>1 | 2.31E-28        | 6 | Mesenchymal<br>progenitor_6 |
| Rpl13    | 8.00E-32 | 0.31655773<br>7  | 1            | 1         | 1.17E-27        | 6 | Mesenchymal<br>progenitor_6 |
| Gm10260  | 1.31E-30 | 0.43241099<br>5  | 0.99<br>7    | 0.94<br>8 | 1.91E-26        | 6 | Mesenchymal<br>progenitor_6 |
| Nme2     | 2.43E-29 | 0.78775689<br>7  | 0.64<br>6    | 0.20<br>4 | 3.54E-25        | 6 | Mesenchymal<br>progenitor_6 |
| Atp5k    | 9.82E-28 | -0.6344758<br>17 | 0.81<br>5    | 0.92<br>2 | 1.43E-23        | 6 | Mesenchymal<br>progenitor_6 |

|          |          |            |    |              |          |   |                          |
|----------|----------|------------|----|--------------|----------|---|--------------------------|
| Rps6     | 7.50E-27 | 0.39022907 | 1  | 0.96<br>7    | 1.09E-22 | 6 | Mesenchymal progenitor_6 |
| Calr     | 2.36E-25 | 0.68148236 | 9  | 0.85<br>9    | 3.43E-21 | 6 | Mesenchymal progenitor_6 |
| Ibsp     | 2.85E-24 | 0.68914478 | 6  | 0.71<br>4    | 4.15E-20 | 6 | Mesenchymal progenitor_6 |
| Rpl10    | 1.05E-23 | 0.38106441 | 7  | 0.99<br>2    | 1.54E-19 | 6 | Mesenchymal progenitor_6 |
| Rps5     | 1.79E-23 | 0.34936906 | 1  | 0.98<br>1    | 2.61E-19 | 6 | Mesenchymal progenitor_6 |
| Rpl9     | 5.41E-22 | 0.36409309 | 6  | 0.99<br>5    | 7.88E-18 | 6 | Mesenchymal progenitor_6 |
| Eef1a1   | 1.33E-20 | 0.31783378 | 8  | 0.98<br>5    | 1.94E-16 | 6 | Mesenchymal progenitor_6 |
| Rpl32    | 5.11E-20 | 0.28392872 | 9  | 0.99<br>3    | 7.44E-16 | 6 | Mesenchymal progenitor_6 |
| Nmt1     | 8.99E-20 | -0.6993833 | 86 | 0.20<br>8    | 1.31E-15 | 6 | Mesenchymal progenitor_6 |
| Rpl19    | 2.07E-19 | 0.29648555 | 4  | 0.99<br>7    | 3.01E-15 | 6 | Mesenchymal progenitor_6 |
| Fos      | 8.84E-19 | -1.1921640 | 07 | 0.31<br>4    | 1.29E-14 | 6 | Mesenchymal progenitor_6 |
| Timp1    | 1.11E-18 | 0.56675597 | 6  | 0.94<br>0.73 | 1.62E-14 | 6 | Mesenchymal progenitor_6 |
| Rpl13a   | 4.08E-18 | 0.25786241 | 6  | 0.99<br>1    | 5.94E-14 | 6 | Mesenchymal progenitor_6 |
| Eif4ebp1 | 4.28E-18 | 0.52495    |    | 0.87<br>8    | 6.24E-14 | 6 | Mesenchymal progenitor_6 |
| Rpl29    | 4.79E-18 | 0.52895385 | 2  | 0.72<br>9    | 6.97E-14 | 6 | Mesenchymal progenitor_6 |
| Malat1   | 7.28E-18 | -0.5720427 | 81 | 1<br>1       | 1.06E-13 | 6 | Mesenchymal progenitor_6 |
| Gm10076  | 1.07E-17 | -0.3097252 | 37 | 0.99<br>1    | 1.56E-13 | 6 | Mesenchymal progenitor_6 |
| Eif1     | 2.12E-17 | 0.32421827 | 9  | 0.99<br>5    | 3.08E-13 | 6 | Mesenchymal progenitor_6 |
| mt-Nd2   | 5.92E-17 | -0.6388219 | 13 | 0.56<br>5    | 8.63E-13 | 6 | Mesenchymal progenitor_6 |
| Rpl4     | 7.10E-17 | 0.35666393 | 3  | 0.98<br>7    | 1.03E-12 | 6 | Mesenchymal progenitor_6 |
| Rpl23a   | 7.86E-17 | 0.30425127 | 3  | 0.99<br>9    | 1.15E-12 | 6 | Mesenchymal progenitor_6 |
| Rps3     | 4.81E-16 | 0.27112488 | 1  | 0.98<br>1    | 7.01E-12 | 6 | Mesenchymal progenitor_6 |
| Rpl3     | 1.38E-15 | 0.34419568 | 9  | 0.99<br>9    | 2.00E-11 | 6 | Mesenchymal progenitor_6 |
| Snhg9    | 5.95E-15 | -0.6099689 | 47 | 0.06<br>0.27 | 8.66E-11 | 6 | Mesenchymal progenitor_6 |

|          |          |                  |           |           |          |   |                             |
|----------|----------|------------------|-----------|-----------|----------|---|-----------------------------|
| Rps7     | 5.97E-15 | 0.30521654<br>8  | 0.98<br>4 | 0.94<br>8 | 8.70E-11 | 6 | Mesenchymal<br>progenitor_6 |
| Rps4x    | 6.35E-15 | 0.27951513<br>4  | 0.99<br>7 | 0.96<br>3 | 9.24E-11 | 6 | Mesenchymal<br>progenitor_6 |
| Manf     | 6.48E-15 | 0.53052328<br>6  | 0.71<br>6 | 0.39<br>3 | 9.44E-11 | 6 | Mesenchymal<br>progenitor_6 |
| Ndufa3   | 9.48E-15 | -0.4744598<br>53 | 0.76      | 0.83      | 1.38E-10 | 6 | Mesenchymal<br>progenitor_6 |
| Gm10709  | 1.34E-14 | 0.36199022<br>8  | 0.92<br>7 | 0.80<br>7 | 1.94E-10 | 6 | Mesenchymal<br>progenitor_6 |
| Col8a1   | 2.91E-14 | -0.4623157<br>06 | 0.93<br>8 | 0.97      | 4.23E-10 | 6 | Mesenchymal<br>progenitor_6 |
| Rpl14    | 9.34E-14 | 0.27077156<br>3  | 0.99<br>7 | 0.95<br>9 | 1.36E-09 | 6 | Mesenchymal<br>progenitor_6 |
| Rps3a1   | 4.17E-13 | 0.26007174<br>3  | 1         | 0.99<br>3 | 6.07E-09 | 6 | Mesenchymal<br>progenitor_6 |
| Rpl7     | 6.47E-13 | 0.31650385<br>5  | 0.98<br>2 | 0.89<br>3 | 9.42E-09 | 6 | Mesenchymal<br>progenitor_6 |
| Eif2s2   | 2.94E-12 | -0.4315558<br>28 | 0.86<br>7 | 0.88<br>1 | 4.28E-08 | 6 | Mesenchymal<br>progenitor_6 |
| Lox      | 3.69E-12 | 0.51738643<br>9  | 0.82<br>3 | 0.61<br>1 | 5.38E-08 | 6 | Mesenchymal<br>progenitor_6 |
| Rpl36    | 5.08E-12 | -0.2702340<br>2  | 0.99<br>2 | 0.99<br>3 | 7.40E-08 | 6 | Mesenchymal<br>progenitor_6 |
| Cyb5r1   | 6.21E-12 | 0.44828049<br>2  | 0.40<br>1 | 0.14<br>1 | 9.05E-08 | 6 | Mesenchymal<br>progenitor_6 |
| Gstp1    | 8.18E-12 | 0.46800230<br>3  | 0.65<br>6 | 0.37<br>8 | 1.19E-07 | 6 | Mesenchymal<br>progenitor_6 |
| Ppp1r14b | 9.16E-12 | 0.44030063<br>9  | 0.73<br>2 | 0.47<br>4 | 1.33E-07 | 6 | Mesenchymal<br>progenitor_6 |
| Col6a2   | 1.50E-11 | -0.3933299<br>5  | 0.91<br>9 | 0.92<br>2 | 2.19E-07 | 6 | Mesenchymal<br>progenitor_6 |
| Eno1     | 2.02E-11 | 0.43353681<br>1  | 0.85<br>7 | 0.68<br>9 | 2.95E-07 | 6 | Mesenchymal<br>progenitor_6 |
| Sec61g   | 2.26E-11 | -0.2749707<br>37 | 0.96<br>9 | 0.95<br>9 | 3.30E-07 | 6 | Mesenchymal<br>progenitor_6 |
| Polr2l   | 2.70E-11 | -0.5832368<br>17 | 0.40<br>6 | 0.58<br>1 | 3.94E-07 | 6 | Mesenchymal<br>progenitor_6 |
| Arpc1b   | 5.23E-11 | 0.32062355<br>6  | 0.94      | 0.80<br>7 | 7.62E-07 | 6 | Mesenchymal<br>progenitor_6 |
| Hspa5    | 5.29E-11 | 0.47548726<br>5  | 0.73<br>2 | 0.46<br>3 | 7.71E-07 | 6 | Mesenchymal<br>progenitor_6 |
| Gm10020  | 8.92E-11 | 0.31225439<br>7  | 0.45<br>1 | 0.18<br>1 | 1.30E-06 | 6 | Mesenchymal<br>progenitor_6 |
| Sertad2  | 1.42E-10 | -0.5698603<br>2  | 0.29<br>7 | 0.48<br>5 | 2.07E-06 | 6 | Mesenchymal<br>progenitor_6 |
| Igkc     | 3.69E-10 | -1.3179673<br>1  | 0.28<br>6 | 0.07<br>8 | 5.37E-06 | 6 | Mesenchymal<br>progenitor_6 |



|         |          |                  |           |           |                 |   |                          |
|---------|----------|------------------|-----------|-----------|-----------------|---|--------------------------|
| Hnrnpa3 | 6.06E-10 | 0.34176390<br>3  | 0.81      | 0.53<br>3 | 8.82E-06        | 6 | Mesenchymal progenitor_6 |
| Rbm3    | 7.30E-10 | 0.28824241<br>3  | 0.97<br>4 | 0.85<br>6 | 1.06E-05        | 6 | Mesenchymal progenitor_6 |
| Rps21   | 1.10E-09 | -0.2560634<br>61 | 0.96<br>1 | 0.95<br>9 | 1.60E-05        | 6 | Mesenchymal progenitor_6 |
| Col6a1  | 1.13E-09 | -0.3518757<br>23 | 0.93<br>5 | 0.95<br>6 | 1.64E-05        | 6 | Mesenchymal progenitor_6 |
| Usmg5   | 1.57E-09 | -0.4122567<br>11 | 0.70<br>6 | 0.77<br>4 | 2.29E-05        | 6 | Mesenchymal progenitor_6 |
| Lsm4    | 2.01E-09 | 0.39786997<br>3  | 0.57<br>6 | 0.30<br>7 | 2.93E-05        | 6 | Mesenchymal progenitor_6 |
| Egr1    | 2.12E-09 | -0.7830478<br>22 | 0.36<br>2 | 0.52<br>2 | 3.08E-05        | 6 | Mesenchymal progenitor_6 |
| Arl6ip5 | 2.61E-09 | 0.39814136<br>5  | 0.39<br>1 | 0.16<br>7 | 3.81E-05        | 6 | Mesenchymal progenitor_6 |
| Tomm7   | 2.79E-09 | -0.3623127<br>33 | 0.66<br>4 | 0.76<br>7 | 4.06E-05        | 6 | Mesenchymal progenitor_6 |
| Vim     | 3.42E-09 | 0.29441288<br>1  | 0.98<br>4 | 0.93      | 4.98E-05        | 6 | Mesenchymal progenitor_6 |
| Pabpc1  | 4.46E-09 | 0.31915760<br>7  | 0.85<br>9 | 0.67<br>4 | 6.49E-05        | 6 | Mesenchymal progenitor_6 |
| Pdgfrb  | 4.48E-09 | -0.4553648<br>45 | 0.81      | 0.86<br>7 | 6.52E-05        | 6 | Mesenchymal progenitor_6 |
| Rpl27   | 4.74E-09 | 0.27074779<br>4  | 0.93<br>8 | 0.84<br>4 | 6.91E-05        | 6 | Mesenchymal progenitor_6 |
| Hspa9   | 6.64E-09 | 0.31232117<br>1  | 0.75<br>3 | 0.48<br>5 | 9.67E-05        | 6 | Mesenchymal progenitor_6 |
| Fads3   | 9.97E-09 | 0.36284480<br>4  | 0.50<br>3 | 0.26<br>7 | 0.00014517      | 6 | Mesenchymal progenitor_6 |
| Gm6576  | 1.28E-08 | 0.26043477<br>7  | 0.13<br>8 | 0.01<br>1 | 0.00018593<br>2 | 6 | Mesenchymal progenitor_6 |
| Mgp     | 1.62E-08 | -0.4478243<br>29 | 0.86<br>5 | 0.92<br>6 | 0.00023531<br>6 | 6 | Mesenchymal progenitor_6 |
| Gm10126 | 1.79E-08 | -0.3029780<br>55 | 0.01<br>8 | 0.12<br>6 | 0.00026052<br>9 | 6 | Mesenchymal progenitor_6 |
| Ybx1    | 1.81E-08 | 0.26798324<br>2  | 0.96<br>1 | 0.88<br>1 | 0.00026423      | 6 | Mesenchymal progenitor_6 |
| Psat1   | 1.87E-08 | 0.31809416<br>4  | 0.29<br>7 | 0.10<br>4 | 0.00027166      | 6 | Mesenchymal progenitor_6 |
| mt-Nd3  | 1.90E-08 | -0.4406048<br>62 | 0.10<br>4 | 0.25<br>9 | 0.00027599<br>1 | 6 | Mesenchymal progenitor_6 |
| Ftl1    | 1.96E-08 | 0.25968245<br>3  | 1<br>1    | 0.99<br>6 | 0.00028596<br>9 | 6 | Mesenchymal progenitor_6 |
| Txn1    | 1.97E-08 | 0.33004754<br>5  | 0.87<br>8 | 0.65<br>6 | 0.00028689<br>5 | 6 | Mesenchymal progenitor_6 |
| Rpl6l   | 2.02E-08 | 0.28398969<br>2  | 0.42<br>2 | 0.18<br>5 | 0.00029355<br>8 | 6 | Mesenchymal progenitor_6 |

|           |          |                  |           |           |                 |   |                             |
|-----------|----------|------------------|-----------|-----------|-----------------|---|-----------------------------|
| Ptrf      | 2.57E-08 | -0.4341179<br>66 | 0.62      | 0.7       | 0.00037377      | 6 | Mesenchymal<br>progenitor_6 |
| Adrm1     | 2.57E-08 | 0.31204843       | 0.46<br>4 | 0.23      | 0.00037431<br>5 | 6 | Mesenchymal<br>progenitor_6 |
| Rnf10     | 3.51E-08 | 0.29008395<br>5  | 0.33<br>1 | 0.13      | 0.00051188<br>4 | 6 | Mesenchymal<br>progenitor_6 |
| Ctsb      | 3.52E-08 | -0.6836687<br>74 | 0.51      | 0.61<br>5 | 0.00051271      | 6 | Mesenchymal<br>progenitor_6 |
| Btf3      | 4.06E-08 | 0.27701721<br>3  | 0.91<br>7 | 0.72<br>2 | 0.00059108<br>9 | 6 | Mesenchymal<br>progenitor_6 |
| Pgk1      | 4.73E-08 | 0.32216311<br>6  | 0.46<br>9 | 0.23<br>7 | 0.00068821<br>4 | 6 | Mesenchymal<br>progenitor_6 |
| Nudt8     | 4.77E-08 | 0.25562696<br>7  | 0.19<br>5 | 0.04<br>4 | 0.00069523<br>5 | 6 | Mesenchymal<br>progenitor_6 |
| Hmga1-rs1 | 5.94E-08 | 0.27044986<br>7  | 0.16<br>4 | 0.03      | 0.00086502<br>1 | 6 | Mesenchymal<br>progenitor_6 |
| Gm9493    | 7.07E-08 | 0.25553194       | 0.32<br>8 | 0.12<br>6 | 0.00102899<br>1 | 6 | Mesenchymal<br>progenitor_6 |
| Eef1b2    | 7.74E-08 | 0.28643333       | 0.87      | 0.64<br>4 | 0.00112665<br>6 | 6 | Mesenchymal<br>progenitor_6 |
| Ldha      | 7.74E-08 | 0.29319442<br>4  | 0.91<br>9 | 0.81<br>1 | 0.00112718<br>1 | 6 | Mesenchymal<br>progenitor_6 |
| Fosb      | 8.54E-08 | -0.6107665<br>87 | 0.10<br>7 | 0.25<br>2 | 0.00124418<br>6 | 6 | Mesenchymal<br>progenitor_6 |
| Yif1b     | 1.05E-07 | 0.26265319<br>3  | 0.42<br>4 | 0.2       | 0.00152654<br>1 | 6 | Mesenchymal<br>progenitor_6 |
| Nhp2      | 1.13E-07 | 0.30093426       | 0.59<br>4 | 0.35<br>2 | 0.00164569<br>6 | 6 | Mesenchymal<br>progenitor_6 |
| Hspe1     | 1.16E-07 | 0.34663366<br>2  | 0.82      | 0.63<br>3 | 0.00168417<br>5 | 6 | Mesenchymal<br>progenitor_6 |
| Slc25a5   | 1.50E-07 | 0.28751229<br>5  | 0.84<br>6 | 0.64<br>4 | 0.00218411<br>1 | 6 | Mesenchymal<br>progenitor_6 |
| Eif3k     | 1.94E-07 | 0.28123609<br>1  | 0.83<br>3 | 0.65<br>2 | 0.00282283<br>3 | 6 | Mesenchymal<br>progenitor_6 |
| Vamp5     | 2.17E-07 | 0.30567996<br>9  | 0.46<br>1 | 0.23<br>7 | 0.00315453<br>1 | 6 | Mesenchymal<br>progenitor_6 |
| Timm17a   | 2.22E-07 | 0.28467588<br>4  | 0.56<br>8 | 0.32<br>6 | 0.00324011<br>5 | 6 | Mesenchymal<br>progenitor_6 |
| Gm10116   | 2.32E-07 | 0.33556910<br>6  | 0.51      | 0.29<br>6 | 0.00337943<br>6 | 6 | Mesenchymal<br>progenitor_6 |
| Lrp1      | 2.92E-07 | -0.3682247<br>92 | 0.56<br>2 | 0.65<br>6 | 0.00425982<br>5 | 6 | Mesenchymal<br>progenitor_6 |
| Romo1     | 3.23E-07 | -0.2967307<br>75 | 0.87      | 0.88<br>1 | 0.00471002<br>9 | 6 | Mesenchymal<br>progenitor_6 |
| Rtn4      | 3.34E-07 | 0.34025277<br>7  | 0.75<br>3 | 0.56<br>7 | 0.00486918<br>8 | 6 | Mesenchymal<br>progenitor_6 |
| Gm10036   | 3.66E-07 | 0.32250383<br>4  | 0.54<br>9 | 0.33<br>7 | 0.00532530<br>5 | 6 | Mesenchymal<br>progenitor_6 |

|         |          |                  |           |           |                 |   |                             |
|---------|----------|------------------|-----------|-----------|-----------------|---|-----------------------------|
| Pdia3   | 3.74E-07 | 0.32084569<br>7  | 0.41<br>4 | 0.21<br>1 | 0.00544025<br>2 | 6 | Mesenchymal<br>progenitor_6 |
| Psap    | 4.10E-07 | -0.3346060<br>96 | 0.75<br>8 | 0.78<br>5 | 0.00596493<br>6 | 6 | Mesenchymal<br>progenitor_6 |
| Eif3f   | 4.66E-07 | 0.25247296<br>6  | 0.88<br>8 | 0.74<br>8 | 0.00679345<br>3 | 6 | Mesenchymal<br>progenitor_6 |
| Srsf10  | 4.79E-07 | 0.29917190<br>4  | 0.32<br>3 | 0.14<br>1 | 0.00697226<br>7 | 6 | Mesenchymal<br>progenitor_6 |
| Mthfd2  | 6.11E-07 | 0.27473776<br>6  | 0.39<br>6 | 0.18<br>9 | 0.00890038<br>5 | 6 | Mesenchymal<br>progenitor_6 |
| Arpc1a  | 6.50E-07 | 0.27806505<br>3  | 0.44<br>3 | 0.23<br>3 | 0.00946267<br>9 | 6 | Mesenchymal<br>progenitor_6 |
| Snhg18  | 6.71E-07 | -0.5016961<br>09 | 0.42<br>7 | 0.53<br>3 | 0.00977936<br>4 | 6 | Mesenchymal<br>progenitor_6 |
| Rps28   | 7.24E-51 | -0.9786310<br>9  | 0.99<br>6 | 1<br>1    | 1.05E-46        | 7 | Endothelial<br>progenitor_7 |
| Rps29   | 4.75E-49 | -0.6679398<br>93 | 1<br>1    | 1<br>1    | 6.92E-45        | 7 | Endothelial<br>progenitor_7 |
| Rpl38   | 3.61E-42 | -0.5929616<br>26 | 1<br>1    | 1<br>1    | 5.26E-38        | 7 | Endothelial<br>progenitor_7 |
| Rpl41   | 4.22E-42 | -0.5527874<br>97 | 1<br>1    | 1<br>1    | 6.15E-38        | 7 | Endothelial<br>progenitor_7 |
| Gm8730  | 7.82E-40 | 0.80972270<br>9  | 0.99<br>1 | 0.96<br>1 | 1.14E-35        | 7 | Endothelial<br>progenitor_7 |
| Rps27   | 9.29E-36 | -0.4720305<br>92 | 1<br>1    | 1<br>1    | 1.35E-31        | 7 | Endothelial<br>progenitor_7 |
| Gm26917 | 3.42E-33 | 0.74577424<br>5  | 0.95<br>3 | 0.71<br>8 | 4.98E-29        | 7 | Endothelial<br>progenitor_7 |
| Rpl37a  | 2.34E-29 | -0.3921238<br>12 | 1<br>1    | 1<br>1    | 3.41E-25        | 7 | Endothelial<br>progenitor_7 |
| Rps21   | 9.34E-29 | -0.5489124<br>08 | 0.99<br>6 | 0.99<br>4 | 1.36E-24        | 7 | Endothelial<br>progenitor_7 |
| Rpl15   | 1.56E-28 | 0.56708673<br>4  | 0.97<br>8 | 0.92<br>7 | 2.28E-24        | 7 | Endothelial<br>progenitor_7 |
| Gm10076 | 2.82E-27 | -0.4651428<br>44 | 0.99<br>6 | 0.99<br>4 | 4.11E-23        | 7 | Endothelial<br>progenitor_7 |
| Rplp0   | 2.26E-26 | 0.52342237<br>1  | 1<br>1    | 0.97<br>7 | 3.30E-22        | 7 | Endothelial<br>progenitor_7 |
| Eif2s2  | 4.80E-25 | -0.5694294<br>42 | 0.90<br>1 | 0.97<br>2 | 6.99E-21        | 7 | Endothelial<br>progenitor_7 |
| Ptrf    | 6.21E-25 | -0.8070997<br>58 | 0.84<br>1 | 0.95<br>5 | 9.05E-21        | 7 | Endothelial<br>progenitor_7 |
| Rps2    | 2.84E-23 | 0.47543118<br>8  | 1<br>1    | 0.99<br>4 | 4.14E-19        | 7 | Endothelial<br>progenitor_7 |
| Snhg9   | 1.17E-22 | -0.8589692<br>29 | 0.09<br>9 | 0.51<br>4 | 1.71E-18        | 7 | Endothelial<br>progenitor_7 |
| Atp5k   | 1.91E-22 | -0.6057286<br>38 | 0.85<br>3 | 0.94<br>9 | 2.78E-18        | 7 | Endothelial<br>progenitor_7 |

|        |          |                  |           |           |          |   |                             |
|--------|----------|------------------|-----------|-----------|----------|---|-----------------------------|
| Nmt1   | 2.07E-22 | -0.8033055<br>34 | 0.26<br>7 | 0.67<br>2 | 3.01E-18 | 7 | Endothelial<br>progenitor_7 |
| mt-Nd2 | 4.49E-21 | -0.7243953<br>3  | 0.76<br>3 | 0.91<br>5 | 6.54E-17 | 7 | Endothelial<br>progenitor_7 |
| Col1a2 | 2.71E-19 | 0.44394638<br>4  | 0.97<br>8 | 0.75<br>7 | 3.95E-15 | 7 | Endothelial<br>progenitor_7 |
| Cd200  | 5.45E-19 | -0.9405221<br>77 | 0.40<br>9 | 0.76<br>3 | 7.94E-15 | 7 | Endothelial<br>progenitor_7 |
| Bst2   | 6.42E-19 | 0.66833197<br>4  | 0.68<br>1 | 0.23<br>7 | 9.34E-15 | 7 | Endothelial<br>progenitor_7 |
| lbsp   | 4.19E-18 | 0.67572342<br>6  | 0.67<br>2 | 0.23<br>7 | 6.10E-14 | 7 | Endothelial<br>progenitor_7 |
| Rpl36  | 4.42E-17 | -0.3587519<br>32 | 0.99<br>6 | 0.99<br>4 | 6.44E-13 | 7 | Endothelial<br>progenitor_7 |
| Rpl10  | 2.23E-16 | 0.38139417<br>8  | 0.99<br>1 | 0.96      | 3.25E-12 | 7 | Endothelial<br>progenitor_7 |
| Hes1   | 2.49E-16 | -0.8683215<br>41 | 0.42<br>2 | 0.72<br>3 | 3.62E-12 | 7 | Endothelial<br>progenitor_7 |
| Malat1 | 9.55E-16 | -0.4938228<br>02 | 1         | 0.99<br>4 | 1.39E-11 | 7 | Endothelial<br>progenitor_7 |
| Marcks | 6.15E-14 | -0.5484885<br>38 | 0.88<br>8 | 0.96      | 8.96E-10 | 7 | Endothelial<br>progenitor_7 |
| Eno1   | 6.47E-14 | 0.51180273<br>6  | 0.94      | 0.79<br>1 | 9.42E-10 | 7 | Endothelial<br>progenitor_7 |
| Rpl29  | 7.13E-14 | 0.50347611<br>5  | 0.84<br>1 | 0.58<br>2 | 1.04E-09 | 7 | Endothelial<br>progenitor_7 |
| Sep15  | 8.49E-14 | 0.42683048<br>7  | 0.93<br>1 | 0.78      | 1.24E-09 | 7 | Endothelial<br>progenitor_7 |
| Polr2l | 2.51E-13 | -0.5659837<br>95 | 0.5       | 0.75<br>1 | 3.66E-09 | 7 | Endothelial<br>progenitor_7 |
| Rpl39  | 2.57E-13 | -0.4010062<br>1  | 0.97<br>4 | 0.98<br>3 | 3.75E-09 | 7 | Endothelial<br>progenitor_7 |
| Rpl4   | 2.93E-13 | 0.36871266<br>6  | 0.98<br>3 | 0.98<br>3 | 4.26E-09 | 7 | Endothelial<br>progenitor_7 |
| Ftl1   | 3.33E-13 | 0.29299589<br>3  | 1         | 1         | 4.85E-09 | 7 | Endothelial<br>progenitor_7 |
| Rpl3   | 1.23E-12 | 0.37934198<br>1  | 0.97<br>8 | 0.94<br>4 | 1.79E-08 | 7 | Endothelial<br>progenitor_7 |
| Ctla2a | 4.94E-12 | 0.61442122<br>3  | 1         | 0.97<br>2 | 7.20E-08 | 7 | Endothelial<br>progenitor_7 |
| Rpl18a | 6.14E-12 | 0.26136008<br>1  | 1         | 1         | 8.94E-08 | 7 | Endothelial<br>progenitor_7 |
| Rps3   | 6.36E-12 | 0.25308657<br>6  | 1         | 1         | 9.27E-08 | 7 | Endothelial<br>progenitor_7 |
| Rpl37  | 6.65E-12 | -0.2671995<br>59 | 0.99<br>6 | 0.99<br>4 | 9.69E-08 | 7 | Endothelial<br>progenitor_7 |
| Arpc1b | 7.55E-12 | 0.36248160<br>2  | 0.98<br>3 | 0.91      | 1.10E-07 | 7 | Endothelial<br>progenitor_7 |

|         |          |                  |           |           |          |   |                             |
|---------|----------|------------------|-----------|-----------|----------|---|-----------------------------|
| Tfpi2   | 7.74E-12 | 0.82904555<br>5  | 0.60<br>8 | 0.29<br>4 | 1.13E-07 | 7 | Endothelial<br>progenitor_7 |
| Slc25a4 | 1.02E-11 | 0.40589362<br>2  | 0.96<br>1 | 0.83<br>6 | 1.49E-07 | 7 | Endothelial<br>progenitor_7 |
| Rps7    | 1.56E-11 | 0.3046903<br>7   | 0.98<br>7 | 0.95<br>5 | 2.28E-07 | 7 | Endothelial<br>progenitor_7 |
| Cdh5    | 2.81E-11 | -0.3715741<br>76 | 1<br>1    | 0.99<br>4 | 4.09E-07 | 7 | Endothelial<br>progenitor_7 |
| Gm10126 | 3.77E-11 | -0.3024106<br>39 | 0.00<br>9 | 0.19<br>8 | 5.49E-07 | 7 | Endothelial<br>progenitor_7 |
| Sertad2 | 3.80E-11 | -0.5932168<br>42 | 0.31<br>5 | 0.57<br>1 | 5.54E-07 | 7 | Endothelial<br>progenitor_7 |
| Gm10020 | 4.12E-11 | 0.44322045<br>2  | 0.65<br>1 | 0.33<br>3 | 5.99E-07 | 7 | Endothelial<br>progenitor_7 |
| Rps18   | 4.43E-11 | 0.29605550<br>5  | 0.99<br>1 | 0.98<br>3 | 6.45E-07 | 7 | Endothelial<br>progenitor_7 |
| Pcdh17  | 6.44E-11 | -0.6992989<br>71 | 0.66<br>4 | 0.80<br>8 | 9.38E-07 | 7 | Endothelial<br>progenitor_7 |
| Rps6    | 1.53E-10 | 0.26848533<br>7  | 1<br>1    | 0.99<br>4 | 2.23E-06 | 7 | Endothelial<br>progenitor_7 |
| Dync1i2 | 2.42E-10 | -0.4456602<br>31 | 0.55<br>2 | 0.75<br>7 | 3.53E-06 | 7 | Endothelial<br>progenitor_7 |
| Jag1    | 3.21E-10 | 0.67170236<br>4  | 0.72<br>8 | 0.46<br>3 | 4.68E-06 | 7 | Endothelial<br>progenitor_7 |
| Gpihbp1 | 3.94E-10 | -0.5188576<br>61 | 0.78<br>9 | 0.94<br>4 | 5.74E-06 | 7 | Endothelial<br>progenitor_7 |
| Gng11   | 4.20E-10 | 0.30974841<br>3  | 0.99<br>6 | 0.98<br>9 | 6.11E-06 | 7 | Endothelial<br>progenitor_7 |
| Tomm7   | 5.99E-10 | -0.3778700<br>47 | 0.87<br>5 | 0.93<br>2 | 8.73E-06 | 7 | Endothelial<br>progenitor_7 |
| Gm10709 | 1.44E-09 | 0.34400305<br>2  | 0.94<br>8 | 0.84<br>7 | 2.09E-05 | 7 | Endothelial<br>progenitor_7 |
| Ndufa3  | 2.14E-09 | -0.4591195<br>89 | 0.78<br>7 | 0.84<br>2 | 3.12E-05 | 7 | Endothelial<br>progenitor_7 |
| Pgk1    | 2.22E-09 | 0.43019904<br>4  | 0.71<br>1 | 0.41<br>8 | 3.24E-05 | 7 | Endothelial<br>progenitor_7 |
| Psap    | 2.82E-09 | -0.4265512<br>14 | 0.89<br>7 | 0.93<br>8 | 4.10E-05 | 7 | Endothelial<br>progenitor_7 |
| Myh9    | 4.06E-09 | -0.4560891<br>02 | 0.65<br>5 | 0.79<br>7 | 5.91E-05 | 7 | Endothelial<br>progenitor_7 |
| Timm17a | 4.30E-09 | 0.39810152<br>9  | 0.73<br>3 | 0.49<br>7 | 6.26E-05 | 7 | Endothelial<br>progenitor_7 |
| Rps27rt | 4.34E-09 | -0.4408499<br>86 | 0.25<br>7 | 0.50<br>8 | 6.32E-05 | 7 | Endothelial<br>progenitor_7 |
| Gm10260 | 4.54E-09 | 0.27214187<br>4  | 0.98<br>7 | 0.96<br>6 | 6.61E-05 | 7 | Endothelial<br>progenitor_7 |
| Nisch   | 5.53E-09 | -0.4295177<br>54 | 0.67<br>2 | 0.82<br>5 | 8.05E-05 | 7 | Endothelial<br>progenitor_7 |

|          |          |                  |              |              |                 |   |                             |
|----------|----------|------------------|--------------|--------------|-----------------|---|-----------------------------|
| Cdkn1a   | 7.89E-09 | 0.35096037<br>2  | 0.90<br>9    | 0.76<br>8    | 0.00011493<br>2 | 7 | Endothelial<br>progenitor_7 |
| Sec61g   | 8.41E-09 | -0.2769639<br>96 | 0.96<br>1    | 0.97<br>7    | 0.00012254<br>1 | 7 | Endothelial<br>progenitor_7 |
| Igkc     | 1.25E-08 | 0.34145048<br>1  | 0.40<br>1    | 0.14<br>1    | 0.00018228<br>7 | 7 | Endothelial<br>progenitor_7 |
| Bola2    | 1.68E-08 | -0.3154075<br>54 | 0.94<br>0.94 | 0.96<br>0.96 | 0.00024413<br>9 | 7 | Endothelial<br>progenitor_7 |
| Pet100   | 2.21E-08 | -0.4446098<br>87 | 0.40<br>9    | 0.63<br>3    | 0.00032170<br>4 | 7 | Endothelial<br>progenitor_7 |
| Ppp1r14b | 2.23E-08 | 0.32017991<br>2  | 0.94<br>8    | 0.87<br>6    | 0.00032418<br>2 | 7 | Endothelial<br>progenitor_7 |
| Col1a1   | 2.55E-08 | 0.26019286<br>3  | 0.94<br>0.94 | 0.78<br>0.78 | 0.00037088<br>8 | 7 | Endothelial<br>progenitor_7 |
| Gm10073  | 2.99E-08 | -0.4033187<br>85 | 0.61<br>2    | 0.76<br>3    | 0.00043589<br>5 | 7 | Endothelial<br>progenitor_7 |
| Prss23   | 3.27E-08 | 0.39160896<br>7  | 0.87<br>9    | 0.73<br>4    | 0.00047665<br>7 | 7 | Endothelial<br>progenitor_7 |
| Eif4ebp1 | 3.86E-08 | 0.33905386<br>7  | 0.92<br>7    | 0.77<br>4    | 0.00056216<br>8 | 7 | Endothelial<br>progenitor_7 |
| mt-Nd3   | 4.29E-08 | -0.4366844<br>28 | 0.15<br>5    | 0.37<br>3    | 0.00062535<br>2 | 7 | Endothelial<br>progenitor_7 |
| Ndufs3   | 4.31E-08 | 0.31513873<br>9  | 0.59<br>9    | 0.28<br>8    | 0.00062760<br>8 | 7 | Endothelial<br>progenitor_7 |
| Lsm4     | 4.57E-08 | 0.33098991<br>3  | 0.75<br>9    | 0.53<br>1    | 0.00066582<br>2 | 7 | Endothelial<br>progenitor_7 |
| Slc25a5  | 4.66E-08 | 0.38894259<br>3  | 0.85<br>8    | 0.68<br>9    | 0.00067880<br>4 | 7 | Endothelial<br>progenitor_7 |
| Plau     | 6.37E-08 | -0.4462799<br>92 | 0.06<br>5    | 0.24<br>9    | 0.00092813<br>3 | 7 | Endothelial<br>progenitor_7 |
| Morc4    | 6.59E-08 | -0.3125295<br>03 | 0.08<br>2    | 0.28<br>2    | 0.00095981<br>6 | 7 | Endothelial<br>progenitor_7 |
| Manf     | 6.98E-08 | 0.30881817<br>9  | 0.84<br>9    | 0.63<br>3    | 0.00101687<br>3 | 7 | Endothelial<br>progenitor_7 |
| Hspg2    | 7.17E-08 | -0.3324434<br>64 | 0.94<br>8    | 0.96<br>6    | 0.00104382<br>3 | 7 | Endothelial<br>progenitor_7 |
| Fabp5    | 8.03E-08 | -0.4957961<br>93 | 0.36<br>2    | 0.57<br>6    | 0.00117018<br>1 | 7 | Endothelial<br>progenitor_7 |
| Pdgfa    | 9.13E-08 | 0.44081620<br>5  | 0.59<br>5    | 0.33<br>9    | 0.00132968<br>8 | 7 | Endothelial<br>progenitor_7 |
| Atp6v0e  | 9.15E-08 | 0.29848124<br>4  | 0.95<br>3    | 0.83<br>6    | 0.00133317<br>7 | 7 | Endothelial<br>progenitor_7 |
| Rtn4     | 9.64E-08 | 0.28631928<br>8  | 0.95<br>3    | 0.87<br>0.87 | 0.00140417<br>7 | 7 | Endothelial<br>progenitor_7 |
| Tgfb2    | 1.02E-07 | -0.4655664<br>65 | 0.60<br>8    | 0.73<br>4    | 0.00148846<br>1 | 7 | Endothelial<br>progenitor_7 |
| Gnas     | 1.13E-07 | 0.26435880<br>2  | 0.96<br>6    | 0.90<br>4    | 0.00164866<br>7 | 7 | Endothelial<br>progenitor_7 |

|             |          |                  |           |           |                 |   |                             |
|-------------|----------|------------------|-----------|-----------|-----------------|---|-----------------------------|
| B2m         | 1.29E-07 | 0.26059178<br>1  | 1         | 0.92<br>7 | 0.00187290<br>9 | 7 | Endothelial<br>progenitor_7 |
| Gm10263     | 1.46E-07 | -0.3905509<br>67 | 0.07<br>3 | 0.26      | 0.00212385<br>6 | 7 | Endothelial<br>progenitor_7 |
| Myeov2      | 1.47E-07 | -0.3322829<br>35 | 0.85<br>8 | 0.93<br>2 | 0.00213963<br>4 | 7 | Endothelial<br>progenitor_7 |
| Mgll        | 1.77E-07 | -0.5054041<br>57 | 0.12<br>1 | 0.31<br>6 | 0.00257171<br>9 | 7 | Endothelial<br>progenitor_7 |
| D8Erttd738e | 1.84E-07 | 0.31333330<br>4  | 0.91<br>8 | 0.72<br>3 | 0.00267606<br>9 | 7 | Endothelial<br>progenitor_7 |
| Pdia3       | 1.98E-07 | 0.36879143<br>4  | 0.56      | 0.31<br>1 | 0.00287749<br>5 | 7 | Endothelial<br>progenitor_7 |
| Ccdc85b     | 2.02E-07 | 0.29057652<br>7  | 0.94<br>4 | 0.79<br>1 | 0.00293864<br>9 | 7 | Endothelial<br>progenitor_7 |
| Srm         | 2.15E-07 | 0.34801554<br>4  | 0.54<br>3 | 0.31<br>1 | 0.00313581<br>7 | 7 | Endothelial<br>progenitor_7 |
| Eef1g       | 2.59E-07 | 0.25261254<br>7  | 0.97<br>8 | 0.92<br>7 | 0.00376599<br>9 | 7 | Endothelial<br>progenitor_7 |
| Kcne3       | 2.72E-07 | 0.48033313<br>5  | 0.87<br>5 | 0.77<br>4 | 0.00396816<br>5 | 7 | Endothelial<br>progenitor_7 |
| Clic1       | 2.78E-07 | 0.27707236<br>5  | 0.95<br>3 | 0.88<br>1 | 0.00404337<br>2 | 7 | Endothelial<br>progenitor_7 |
| Rbp7        | 2.86E-07 | -0.4693320<br>36 | 0.03      | 0.17<br>5 | 0.0041723       | 7 | Endothelial<br>progenitor_7 |
| Nupr1       | 3.45E-07 | 0.37809280<br>4  | 0.64<br>7 | 0.37<br>9 | 0.00502694<br>6 | 7 | Endothelial<br>progenitor_7 |
| Igfbp7      | 4.57E-07 | 0.35158504<br>8  | 0.95<br>3 | 0.94<br>4 | 0.00665942      | 7 | Endothelial<br>progenitor_7 |
| Ly6e        | 4.66E-07 | -0.4336772<br>59 | 0.78      | 0.87<br>6 | 0.00679031<br>2 | 7 | Endothelial<br>progenitor_7 |
| Abca3       | 4.94E-07 | -0.3543720<br>64 | 0.07<br>8 | 0.25<br>4 | 0.00719584<br>9 | 7 | Endothelial<br>progenitor_7 |
| Bax         | 5.11E-07 | 0.25176498<br>1  | 0.93<br>5 | 0.89<br>3 | 0.00744119<br>3 | 7 | Endothelial<br>progenitor_7 |
| Gm9493      | 5.40E-07 | 0.28865448<br>3  | 0.43<br>5 | 0.19<br>2 | 0.00787103<br>8 | 7 | Endothelial<br>progenitor_7 |
| Actn4       | 5.61E-07 | -0.3202502<br>63 | 0.85<br>3 | 0.88<br>1 | 0.00817756<br>5 | 7 | Endothelial<br>progenitor_7 |
| Rapgef4     | 6.16E-07 | -0.3744313<br>12 | 0.18<br>5 | 0.39      | 0.00897070<br>2 | 7 | Endothelial<br>progenitor_7 |
| Rps28       | 3.67E-22 | -0.9853105<br>32 | 1         | 1         | 5.35E-18        | 8 | Osteoblast_8                |
| Snhg9       | 8.36E-21 | -0.6954074<br>22 | 0.09<br>3 | 0.65      | 1.22E-16        | 8 | Osteoblast_8                |
| Rps29       | 9.43E-21 | -0.7035784<br>7  | 1         | 1         | 1.37E-16        | 8 | Osteoblast_8                |
| Rpl38       | 2.47E-18 | -0.7429815<br>01 | 1         | 1         | 3.60E-14        | 8 | Osteoblast_8                |

|         |          |                  |           |           |          |   |              |
|---------|----------|------------------|-----------|-----------|----------|---|--------------|
| Gm8730  | 6.18E-18 | 0.81308839<br>9  | 1         | 1         | 9.00E-14 | 8 | Osteoblast_8 |
| Rpl41   | 1.01E-17 | -0.4664054<br>46 | 1         | 1         | 1.48E-13 | 8 | Osteoblast_8 |
| Nme2    | 1.15E-16 | 1.02248426<br>6  | 0.95<br>5 | 0.52<br>5 | 1.68E-12 | 8 | Osteoblast_8 |
| Smpd3   | 2.17E-16 | -1.5808406<br>38 | 0.76<br>2 | 0.92<br>5 | 3.17E-12 | 8 | Osteoblast_8 |
| Gm26917 | 1.51E-15 | 0.79917819<br>5  | 0.97<br>4 | 0.8       | 2.20E-11 | 8 | Osteoblast_8 |
| Rpl15   | 5.73E-15 | 0.64703431<br>2  | 0.99<br>6 | 0.9       | 8.34E-11 | 8 | Osteoblast_8 |
| Rps27   | 2.29E-14 | -0.4324891<br>71 | 1         | 1         | 3.33E-10 | 8 | Osteoblast_8 |
| Lmo4    | 2.97E-13 | -0.9723898<br>38 | 0.77<br>3 | 0.97<br>5 | 4.32E-09 | 8 | Osteoblast_8 |
| Rps2    | 3.37E-13 | 0.44732218<br>8  | 1         | 1         | 4.91E-09 | 8 | Osteoblast_8 |
| Gm10076 | 6.15E-13 | -0.3970352<br>45 | 1         | 1         | 8.96E-09 | 8 | Osteoblast_8 |
| mt-Nd2  | 1.74E-12 | -1.0427000<br>03 | 0.78<br>1 | 0.92<br>5 | 2.53E-08 | 8 | Osteoblast_8 |
| Gm10263 | 8.03E-12 | -0.6102741<br>52 | 0.07<br>1 | 0.42<br>5 | 1.17E-07 | 8 | Osteoblast_8 |
| Rpl36   | 1.34E-11 | -0.4077918<br>54 | 1         | 1         | 1.95E-07 | 8 | Osteoblast_8 |
| Eif2s2  | 2.25E-11 | -0.5758723<br>29 | 0.96<br>7 | 1         | 3.28E-07 | 8 | Osteoblast_8 |
| Ftl1    | 2.37E-11 | 0.54616391<br>6  | 1         | 1         | 3.45E-07 | 8 | Osteoblast_8 |
| Rpl13   | 1.78E-10 | 0.28042681<br>8  | 1         | 1         | 2.59E-06 | 8 | Osteoblast_8 |
| Rpl37a  | 2.24E-10 | -0.3520374<br>32 | 1         | 1         | 3.27E-06 | 8 | Osteoblast_8 |
| Mmp12   | 2.41E-10 | -0.3657217<br>9  | 0.00<br>4 | 0.17<br>5 | 3.50E-06 | 8 | Osteoblast_8 |
| Snhg18  | 4.37E-10 | -0.6901969<br>66 | 0.85<br>9 | 0.95      | 6.36E-06 | 8 | Osteoblast_8 |
| Sepw1   | 8.49E-10 | 0.62825268<br>7  | 0.95<br>9 | 0.67<br>5 | 1.24E-05 | 8 | Osteoblast_8 |
| Nmt1    | 4.10E-09 | -0.6557089<br>49 | 0.21<br>6 | 0.6       | 5.97E-05 | 8 | Osteoblast_8 |
| Gm10116 | 4.26E-09 | 0.63880304<br>6  | 0.92<br>9 | 0.6       | 6.21E-05 | 8 | Osteoblast_8 |
| Rps21   | 5.82E-09 | -0.4193159<br>78 | 0.99<br>6 | 1         | 8.47E-05 | 8 | Osteoblast_8 |
| mt-Nd3  | 6.32E-09 | -0.5985339<br>63 | 0.17<br>5 | 0.57<br>5 | 9.21E-05 | 8 | Osteoblast_8 |



|          |          |                  |           |           |                 |   |                  |
|----------|----------|------------------|-----------|-----------|-----------------|---|------------------|
| Oaz1     | 7.76E-09 | 0.30965629<br>3  | 0.99<br>6 | 1         | 0.00011299<br>5 | 8 | Osteoblast_8     |
| Rpl39    | 1.29E-08 | -0.4632780<br>19 | 0.99<br>3 | 0.97<br>5 | 0.00018794<br>2 | 8 | Osteoblast_8     |
| Arpc1b   | 1.88E-08 | 0.55204720<br>5  | 0.98<br>1 | 0.9       | 0.00027347<br>9 | 8 | Osteoblast_8     |
| Rpl18a   | 2.26E-08 | 0.31732337<br>2  | 1         | 1         | 0.00032958<br>5 | 8 | Osteoblast_8     |
| Rps27rt  | 3.08E-08 | -0.5530215<br>77 | 0.45      | 0.77<br>5 | 0.00044850<br>5 | 8 | Osteoblast_8     |
| Rpl10    | 4.06E-08 | 0.32255209<br>4  | 1         | 1         | 0.00059149      | 8 | Osteoblast_8     |
| Malat1   | 4.77E-08 | -0.5890185<br>9  | 1         | 1         | 0.00069456<br>1 | 8 | Osteoblast_8     |
| S100a10  | 6.27E-08 | 0.65022844<br>9  | 0.92<br>2 | 0.7       | 0.00091354<br>8 | 8 | Osteoblast_8     |
| Rpl29    | 7.11E-08 | 0.52536327<br>4  | 0.95<br>9 | 0.75      | 0.00103484<br>8 | 8 | Osteoblast_8     |
| Sertad2  | 1.03E-07 | -0.6630262<br>89 | 0.47<br>2 | 0.8       | 0.00149540<br>6 | 8 | Osteoblast_8     |
| Rplp0    | 1.04E-07 | 0.38665503<br>2  | 1         | 0.97<br>5 | 0.00151661<br>8 | 8 | Osteoblast_8     |
| Gpc1     | 2.29E-07 | -0.5562091<br>57 | 0.88<br>8 | 0.97<br>5 | 0.00333671<br>3 | 8 | Osteoblast_8     |
| Psap     | 3.62E-07 | -0.7849227<br>49 | 0.87      | 0.92<br>5 | 0.00527163<br>8 | 8 | Osteoblast_8     |
| Gm10073  | 3.95E-07 | -0.4309658<br>62 | 0.88<br>8 | 0.97<br>5 | 0.00574683<br>1 | 8 | Osteoblast_8     |
| Zfp36    | 4.13E-07 | -0.5845643<br>76 | 0.25<br>3 | 0.62<br>5 | 0.00601081<br>4 | 8 | Osteoblast_8     |
| Atp5k    | 4.45E-07 | -0.4407638<br>95 | 0.87<br>7 | 0.97<br>5 | 0.00648043<br>4 | 8 | Osteoblast_8     |
| H3f3b    | 5.36E-07 | 0.39323713<br>4  | 1         | 0.95      | 0.00780302<br>8 | 8 | Osteoblast_8     |
| Serpinh1 | 6.00E-07 | -0.3252390<br>56 | 1         | 1         | 0.00873806<br>8 | 8 | Osteoblast_8     |
| Rps28    | 1.33E-26 | -0.9772148<br>25 | 1         | 1         | 1.94E-22        | 9 | Pre-osteoblast_9 |
| Rps29    | 1.52E-26 | -0.7575557<br>76 | 1         | 1         | 2.21E-22        | 9 | Pre-osteoblast_9 |
| Rpl41    | 1.30E-24 | -0.5465041<br>98 | 1         | 1         | 1.90E-20        | 9 | Pre-osteoblast_9 |
| Smpd3    | 3.01E-23 | -1.6053110<br>02 | 0.82<br>2 | 1         | 4.38E-19        | 9 | Pre-osteoblast_9 |
| Rpl38    | 3.12E-22 | -0.6821902<br>88 | 1         | 1         | 4.55E-18        | 9 | Pre-osteoblast_9 |
| Rps27    | 6.75E-19 | -0.4294500<br>61 | 1         | 1         | 9.84E-15        | 9 | Pre-osteoblast_9 |

|             |          |                  |           |           |          |   |                  |
|-------------|----------|------------------|-----------|-----------|----------|---|------------------|
| Eif2s2      | 9.37E-19 | -0.7914262<br>57 | 0.95<br>6 | 1         | 1.36E-14 | 9 | Pre-osteoblast_9 |
| Gm10076     | 1.15E-18 | -0.4209526<br>86 | 1         | 1         | 1.67E-14 | 9 | Pre-osteoblast_9 |
| Rpl36       | 2.33E-18 | -0.4053486<br>05 | 1         | 1         | 3.39E-14 | 9 | Pre-osteoblast_9 |
| Gm26917     | 3.24E-18 | 0.70097193<br>7  | 0.98<br>7 | 0.93<br>6 | 4.73E-14 | 9 | Pre-osteoblast_9 |
| Gm8730      | 1.04E-17 | 0.73863920<br>5  | 1         | 1         | 1.52E-13 | 9 | Pre-osteoblast_9 |
| Snhg9       | 5.55E-17 | -0.7644742<br>5  | 0.12<br>9 | 0.61<br>7 | 8.08E-13 | 9 | Pre-osteoblast_9 |
| Rpl37a      | 4.80E-16 | -0.3968426<br>37 | 1         | 1         | 7.00E-12 | 9 | Pre-osteoblast_9 |
| Rps21       | 4.76E-15 | -0.4588629<br>35 | 1         | 1         | 6.94E-11 | 9 | Pre-osteoblast_9 |
| Hes1        | 1.75E-13 | -0.9159656<br>27 | 0.53<br>8 | 0.89<br>4 | 2.55E-09 | 9 | Pre-osteoblast_9 |
| RP23-4H17.3 | 1.88E-13 | -0.4097985<br>6  | 0.01<br>3 | 0.29<br>8 | 2.74E-09 | 9 | Pre-osteoblast_9 |
| Rpl37       | 2.05E-13 | -0.3112745<br>51 | 1         | 1         | 2.98E-09 | 9 | Pre-osteoblast_9 |
| Nme2        | 4.35E-12 | 0.72572289<br>2  | 0.92      | 0.66      | 6.33E-08 | 9 | Pre-osteoblast_9 |
| Lmo4        | 5.07E-12 | -0.7503996<br>97 | 0.72<br>9 | 0.93<br>6 | 7.39E-08 | 9 | Pre-osteoblast_9 |
| Sec61g      | 5.95E-12 | -0.4056248<br>11 | 0.99<br>6 | 1         | 8.66E-08 | 9 | Pre-osteoblast_9 |
| Snhg18      | 1.03E-11 | -0.5984784<br>37 | 0.81<br>3 | 0.93<br>6 | 1.50E-07 | 9 | Pre-osteoblast_9 |
| Egr1        | 1.05E-11 | -0.6733611<br>59 | 0.48      | 0.91<br>5 | 1.53E-07 | 9 | Pre-osteoblast_9 |
| Ftl1        | 1.08E-11 | 0.49208629<br>3  | 1         | 1         | 1.57E-07 | 9 | Pre-osteoblast_9 |
| Rps2        | 1.23E-11 | 0.35757611<br>3  | 1         | 1         | 1.79E-07 | 9 | Pre-osteoblast_9 |
| Atp5k       | 1.85E-11 | -0.6245634<br>63 | 0.88<br>9 | 0.97<br>9 | 2.69E-07 | 9 | Pre-osteoblast_9 |
| Rps27rt     | 6.04E-11 | -0.6521901<br>07 | 0.53<br>8 | 0.80<br>9 | 8.79E-07 | 9 | Pre-osteoblast_9 |
| mt-Nd2      | 2.00E-10 | -0.6783474<br>46 | 0.86<br>7 | 0.95<br>7 | 2.92E-06 | 9 | Pre-osteoblast_9 |
| Sertad2     | 3.14E-10 | -0.6643927<br>28 | 0.50<br>2 | 0.83      | 4.58E-06 | 9 | Pre-osteoblast_9 |
| Rpl29       | 4.93E-10 | 0.54140557<br>5  | 0.95<br>1 | 0.83      | 7.18E-06 | 9 | Pre-osteoblast_9 |
| Mef2c       | 7.03E-10 | -0.4571912<br>32 | 0.96<br>9 | 1         | 1.02E-05 | 9 | Pre-osteoblast_9 |

|                   |          |                  |           |           |                 |    |                  |
|-------------------|----------|------------------|-----------|-----------|-----------------|----|------------------|
| ApoE              | 1.55E-09 | -0.3880118<br>81 | 0.08      | 0.40<br>4 | 2.26E-05        | 9  | Pre-osteoblast_9 |
| Rpl15             | 1.59E-09 | 0.36779761<br>7  | 0.99<br>6 | 1         | 2.32E-05        | 9  | Pre-osteoblast_9 |
| Rps26             | 2.44E-09 | -0.2601251<br>55 | 1         | 1         | 3.55E-05        | 9  | Pre-osteoblast_9 |
| Rplp0             | 3.72E-09 | 0.34930892       | 1         | 1         | 5.42E-05        | 9  | Pre-osteoblast_9 |
| Timp1             | 6.91E-09 | 0.51678396<br>5  | 1         | 1         | 0.00010058<br>9 | 9  | Pre-osteoblast_9 |
| Gm10263           | 2.87E-08 | -0.5033890<br>09 | 0.08<br>4 | 0.38<br>3 | 0.00041745<br>3 | 9  | Pre-osteoblast_9 |
| 2010107E04<br>Rik | 1.25E-07 | -0.4867875<br>1  | 0.68<br>4 | 0.89<br>4 | 0.00182703<br>2 | 9  | Pre-osteoblast_9 |
| Rpl39             | 1.29E-07 | -0.3575326<br>94 | 1         | 1         | 0.00187707<br>5 | 9  | Pre-osteoblast_9 |
| Gm10073           | 1.73E-07 | -0.4463729<br>78 | 0.91<br>1 | 0.97<br>9 | 0.00251485<br>1 | 9  | Pre-osteoblast_9 |
| Gm10116           | 2.39E-07 | 0.51664180<br>7  | 0.88<br>4 | 0.61<br>7 | 0.00348341<br>7 | 9  | Pre-osteoblast_9 |
| Fos               | 2.72E-07 | -0.6166221<br>18 | 0.77<br>8 | 0.91<br>5 | 0.00396843      | 9  | Pre-osteoblast_9 |
| mt-Cytb           | 3.00E-07 | 0.27102310<br>3  | 1         | 1         | 0.00436935<br>9 | 9  | Pre-osteoblast_9 |
| Fat3              | 3.64E-07 | -0.5091355<br>67 | 0.24      | 0.55<br>3 | 0.00529651<br>1 | 9  | Pre-osteoblast_9 |
| Rtn4              | 5.36E-07 | 0.50866576<br>2  | 0.79<br>1 | 0.44<br>7 | 0.00780057<br>1 | 9  | Pre-osteoblast_9 |
| Rapgef4           | 5.71E-07 | -0.3374814<br>65 | 0.15<br>6 | 0.46<br>8 | 0.00831980<br>3 | 9  | Pre-osteoblast_9 |
| Scd2              | 6.66E-07 | -0.5709777<br>77 | 0.80<br>4 | 0.93<br>6 | 0.00969418<br>8 | 9  | Pre-osteoblast_9 |
| Rps28             | 3.62E-19 | -0.9247966<br>98 | 0.96<br>3 | 1         | 5.27E-15        | 10 | Osteoclast_10    |
| Rps29             | 1.21E-17 | -0.5897709<br>27 | 1         | 1         | 1.77E-13        | 10 | Osteoclast_10    |
| Rpl38             | 2.70E-16 | -0.7860861<br>73 | 1         | 1         | 3.93E-12        | 10 | Osteoclast_10    |
| Rpl41             | 1.70E-15 | -0.5931388<br>91 | 1         | 1         | 2.48E-11        | 10 | Osteoclast_10    |
| Rpl15             | 8.26E-15 | 1.14570784<br>6  | 0.96<br>3 | 0.54<br>2 | 1.20E-10        | 10 | Osteoclast_10    |
| Gm8730            | 1.01E-14 | 1.23800777<br>2  | 0.98<br>1 | 0.75<br>9 | 1.48E-10        | 10 | Osteoclast_10    |
| mt-Nd2            | 3.23E-14 | -1.1100577<br>92 | 0.74<br>1 | 0.97<br>6 | 4.71E-10        | 10 | Osteoclast_10    |
| Rpl18a            | 3.48E-13 | 0.69390018<br>9  | 1         | 1         | 5.07E-09        | 10 | Osteoclast_10    |

|         |          |                  |           |           |                 |    |               |
|---------|----------|------------------|-----------|-----------|-----------------|----|---------------|
| Rpl9    | 6.24E-13 | 0.73946346<br>3  | 1         | 0.95<br>2 | 9.09E-09        | 10 | Osteoclast_10 |
| Rpl13   | 7.82E-13 | 0.69759159<br>6  | 1         | 1         | 1.14E-08        | 10 | Osteoclast_10 |
| Rpl37a  | 3.06E-12 | -0.5653040<br>13 | 1         | 1         | 4.46E-08        | 10 | Osteoclast_10 |
| Rpl10   | 4.64E-12 | 0.74153390<br>9  | 0.98<br>1 | 0.91<br>6 | 6.76E-08        | 10 | Osteoclast_10 |
| Rplp0   | 5.27E-12 | 0.93941135<br>3  | 0.98<br>1 | 0.94      | 7.68E-08        | 10 | Osteoclast_10 |
| Rpl17   | 2.29E-11 | 0.71562401<br>6  | 1         | 0.85<br>5 | 3.33E-07        | 10 | Osteoclast_10 |
| Gm10260 | 5.18E-11 | 0.67977973<br>4  | 1         | 0.91<br>6 | 7.55E-07        | 10 | Osteoclast_10 |
| Phgdh   | 7.43E-11 | 0.99016714<br>6  | 0.46<br>3 | 0.01<br>2 | 1.08E-06        | 10 | Osteoclast_10 |
| Atp5k   | 1.57E-10 | -0.7709799<br>74 | 0.92<br>6 | 0.96<br>4 | 2.29E-06        | 10 | Osteoclast_10 |
| Rps2    | 2.57E-10 | 0.67031234<br>3  | 1         | 0.95<br>2 | 3.74E-06        | 10 | Osteoclast_10 |
| Rps6    | 8.84E-10 | 0.65071962<br>7  | 1         | 0.98<br>8 | 1.29E-05        | 10 | Osteoclast_10 |
| Rps18   | 1.04E-09 | 0.61501927<br>3  | 1         | 0.98<br>8 | 1.52E-05        | 10 | Osteoclast_10 |
| Gm10076 | 1.57E-09 | -0.5150314<br>58 | 1         | 1         | 2.29E-05        | 10 | Osteoclast_10 |
| Rps5    | 1.75E-09 | 0.56106445<br>5  | 1         | 0.98<br>8 | 2.56E-05        | 10 | Osteoclast_10 |
| Rpl23a  | 1.96E-09 | 0.50507522<br>3  | 1         | 0.96<br>4 | 2.85E-05        | 10 | Osteoclast_10 |
| Rpl3    | 2.98E-09 | 0.75909749<br>8  | 0.96<br>3 | 0.89<br>2 | 4.35E-05        | 10 | Osteoclast_10 |
| Rps7    | 3.87E-09 | 0.66525972<br>1  | 1         | 0.90<br>4 | 5.64E-05        | 10 | Osteoclast_10 |
| Tmsb10  | 6.23E-09 | 1.09501202<br>8  | 0.92<br>6 | 0.67<br>5 | 9.07E-05        | 10 | Osteoclast_10 |
| Prtn3   | 7.63E-09 | 1.9741284        | 0.35<br>2 | 0         | 0.00011107      | 10 | Osteoclast_10 |
| Nmt1    | 8.73E-09 | -1.2579314<br>84 | 0.13      | 0.59      | 0.00012712<br>1 | 10 | Osteoclast_10 |
| Gm10263 | 9.60E-09 | -1.4768964<br>88 | 0.01<br>9 | 0.48<br>2 | 0.00013981<br>5 | 10 | Osteoclast_10 |
| Plac8   | 1.23E-08 | 2.50980058       | 0.37      | 0.01<br>2 | 0.00017982<br>6 | 10 | Osteoclast_10 |
| Psap    | 1.39E-08 | -0.7458909<br>15 | 0.79<br>6 | 0.95<br>2 | 0.00020228<br>7 | 10 | Osteoclast_10 |
| Rpl10a  | 2.52E-08 | 0.48973957<br>9  | 0.98<br>1 | 0.97<br>6 | 0.00036684<br>6 | 10 | Osteoclast_10 |

|        |          |                  |           |           |                 |    |               |
|--------|----------|------------------|-----------|-----------|-----------------|----|---------------|
| Rpl29  | 3.22E-08 | 0.89494313<br>5  | 0.61<br>1 | 0.18<br>1 | 0.00046824<br>4 | 10 | Osteoclast_10 |
| Rpl32  | 5.54E-08 | 0.50388838<br>8  | 1         | 0.98<br>8 | 0.00080622<br>9 | 10 | Osteoclast_10 |
| Rpl19  | 7.08E-08 | 0.44421609<br>4  | 1         | 0.95<br>2 | 0.00103073<br>1 | 10 | Osteoclast_10 |
| Rpl36  | 7.08E-08 | -0.4824127<br>21 | 0.98<br>1 | 1         | 0.00103105<br>6 | 10 | Osteoclast_10 |
| Rplp2  | 8.61E-08 | -0.3657048<br>06 | 1         | 1         | 0.00125365<br>8 | 10 | Osteoclast_10 |
| Lgals1 | 9.98E-08 | 0.88823093<br>5  | 0.98<br>1 | 0.86<br>7 | 0.00145382<br>3 | 10 | Osteoclast_10 |
| Uba52  | 1.12E-07 | 0.60932588<br>6  | 0.94<br>4 | 0.83<br>1 | 0.00163102<br>5 | 10 | Osteoclast_10 |
| Srgn   | 1.33E-07 | 0.91040471<br>3  | 0.33<br>3 | 0.01<br>2 | 0.00194011<br>3 | 10 | Osteoclast_10 |
| Rps21  | 1.35E-07 | -0.5466172<br>38 | 0.96<br>3 | 1         | 0.00196080<br>5 | 10 | Osteoclast_10 |
| Rps19  | 1.63E-07 | 0.31243943<br>1  | 1         | 1         | 0.00237456      | 10 | Osteoclast_10 |
| Ramp1  | 1.69E-07 | 0.88262989<br>8  | 0.33<br>3 | 0.01<br>2 | 0.00246359      | 10 | Osteoclast_10 |
| Rpl26  | 2.50E-07 | 0.36567384<br>7  | 1         | 1         | 0.00363722<br>3 | 10 | Osteoclast_10 |
| Ubb    | 4.14E-07 | 0.74609793<br>1  | 0.87      | 0.61<br>4 | 0.00602872<br>2 | 10 | Osteoclast_10 |
| Ccr2   | 4.32E-07 | 0.6407151        | 0.27<br>8 | 0         | 0.00629145<br>6 | 10 | Osteoclast_10 |
| Cd24a  | 4.52E-07 | 0.86407422<br>2  | 0.31<br>5 | 0.01<br>2 | 0.00658282<br>4 | 10 | Osteoclast_10 |
| S100a4 | 4.84E-07 | -0.8425155<br>06 | 0.44<br>4 | 0.83<br>1 | 0.00704374<br>8 | 10 | Osteoclast_10 |
| Psap   | 2.36E-07 | -1.5316752<br>74 | 1         | 1         | 0.00343312<br>1 | 11 | Osteoclast_11 |
| Rps5   | 3.01E-07 | 0.70427572<br>3  | 1         | 0.97<br>1 | 0.00438362<br>4 | 11 | Osteoclast_11 |
| Rps18  | 4.48E-07 | 0.75038752<br>6  | 1         | 0.91<br>4 | 0.00652608<br>1 | 11 | Osteoclast_11 |
| Rgs10  | 4.68E-07 | 1.08942765<br>8  | 0.87<br>5 | 0.27<br>6 | 0.00681364      | 11 | Osteoclast_11 |
| Rps2   | 3.63E-12 | 1.03515706<br>1  | 1         | 0.82<br>3 | 5.29E-08        | 12 | Osteoclast_12 |
| Rps19  | 1.98E-10 | 0.70917071       | 1         | 1         | 2.88E-06        | 12 | Osteoclast_12 |
| Rps14  | 2.53E-10 | 0.76011695<br>8  | 1         | 0.98<br>7 | 3.69E-06        | 12 | Osteoclast_12 |
| Rps5   | 6.48E-10 | 0.81257694<br>2  | 1         | 0.93<br>7 | 9.43E-06        | 12 | Osteoclast_12 |

|         |          |                  |              |           |                 |    |               |
|---------|----------|------------------|--------------|-----------|-----------------|----|---------------|
| Psap    | 6.75E-10 | -1.0527680<br>84 | 0.93<br>9    | 1         | 9.84E-06        | 12 | Osteoclast_12 |
| Rps16   | 7.03E-10 | 0.66762054<br>2  | 0.94<br>9    | 1         | 1.02E-05        | 12 | Osteoclast_12 |
| Gm8730  | 1.72E-09 | 1.04483848<br>6  | 0.97<br>2    | 0.72      | 2.50E-05        | 12 | Osteoclast_12 |
| Rpl13   | 2.50E-09 | 0.79335557<br>9  | 0.97<br>5    | 1         | 3.65E-05        | 12 | Osteoclast_12 |
| Rps23   | 9.24E-09 | 0.72263546<br>5  | 0.96<br>2    | 1         | 0.00013453<br>4 | 12 | Osteoclast_12 |
| Rpl35   | 9.59E-09 | 0.66228022<br>1  | 1<br>1       | 1         | 0.00013973<br>2 | 12 | Osteoclast_12 |
| Rps4x   | 2.02E-08 | 0.70436326<br>8  | 0.96<br>2    | 1         | 0.00029443<br>5 | 12 | Osteoclast_12 |
| Bgn     | 7.03E-08 | -0.7995753<br>58 | 0.90<br>9    | 0.96<br>2 | 0.00102442<br>9 | 12 | Osteoclast_12 |
| Rpl15   | 8.66E-08 | 0.96355838<br>3  | 0.87<br>9    | 0.44<br>3 | 0.00126192<br>2 | 12 | Osteoclast_12 |
| Rps15a  | 1.51E-07 | 0.71104782<br>4  | 0.97<br>0.81 |           | 0.00220636<br>1 | 12 | Osteoclast_12 |
| Rps18   | 1.55E-07 | 0.69875822<br>9  | 1<br>2       | 0.96      | 0.00225947<br>7 | 12 | Osteoclast_12 |
| Ptrf    | 1.71E-07 | -1.1252102<br>2  | 0.42<br>4    | 0.87<br>3 | 0.00249562<br>9 | 12 | Osteoclast_12 |
| Acta2   | 1.95E-07 | -1.0042870<br>52 | 0.75<br>8    | 0.96<br>2 | 0.00283964<br>3 | 12 | Osteoclast_12 |
| Gm10260 | 2.71E-07 | 0.77212297<br>2  | 1<br>3       | 0.82      | 0.00394221      | 12 | Osteoclast_12 |
| Rpl18a  | 3.52E-07 | 0.65437961<br>2  | 1<br>7       | 0.98      | 0.00512945<br>9 | 12 | Osteoclast_12 |
| Rpl11   | 4.22E-07 | 0.68607705<br>7  | 1<br>5       | 0.83      | 0.00614594<br>5 | 12 | Osteoclast_12 |
| Calu    | 4.83E-07 | -1.0360043<br>91 | 0.66<br>7    | 0.87<br>3 | 0.00702838<br>9 | 12 | Osteoclast_12 |

**Supplementary Table 2: Mouse real-time RT-PCR (qPCR) primers**

| Name           | 5' primer              | 3' primer               |
|----------------|------------------------|-------------------------|
| Adiponectin    | TGTTCCCTCTTAATCCTGCCCA | CCAACCTGCACAAGTTCCCTT   |
| Alp            | CCAACCTCTTTTGTGCCAGAGA | GGCTACATTGGTGTTGAGCTTTT |
| aP2            | GGGGCCAGGCTTCTATTCC    | GGAGCTGGGTTAGGTATGGG    |
| Axin2          | TGACTCTCCTTCCAGATCCCA  | TGCCCACTAGGCTGACA       |
| Bmp4           | TTCCTGGTAACCGAATGCTGA  | CCTGAATCTCGGCGACTTTTT   |
| C/EBP $\alpha$ | CAAGAACAGCAACGAGTACCG  | GTCAGTGGTCAACTCCAGCAC   |
| C/EBP $\beta$  | CAAGCTGAGCGACGAGTACA   | CAGCTGCTCCACCTTCTTCT    |

|                 |                                 |                                  |
|-----------------|---------------------------------|----------------------------------|
| CatK            | AATACGTGCAGCAGAACGGAGG<br>C     | CTCGTTCCCCACAGGAATCTCTCT<br>GTAC |
| Col1a1          | GCTCCTCTTAGGGGCCACT             | CCACGTCTCACCATTGGGG              |
| Csfr1           | CCTCCTCTGGTCCTGCTGCTGG          | GCTCACACATCGCAGGGTCAACC          |
| Cx43            | ACAGCGGTTGAGTCAGCTTG            | GAGAGATGGGGAAGGACTTGT            |
| Dkk1            | CATGAGGCACGCTATGTGCTG           | GCGGCGTTGTGGTCATTACC             |
| Gapdh           | CAGTGCCAGCCTCGTCCCGTAG<br>A     | CTGCAAATGGCAGCCCTGGTGAC          |
| Kindlin-2       | CTCTGACCGAGTCTTCAAGGC           | ATGAGCGTCGTAAGTAGGGGT            |
| Lef1            | TGTTTATCCCATCACGGGTGG           | CATGGAAGTGTGCGCTGACAG            |
| Lrp5            | GGGTCCACAAGGTCAAGGC             | GCACCCTCCATTTCCATCC              |
| Lrp6            | GCCCACTACTCCCTGAATGCTG          | TGTGGATAGGAAGGATGATGTCAG         |
| Mmp9            | TGCCCTGGAACCTCACACGACAT<br>CTTC | TCCACCTGGTTCACCTCATGGTCC         |
| Nfatc1          | CCCCATCCGCCAGGCTACA             | GGTTGTCTGCACTGAGCCAACCTCC        |
| Ocn             | AGGGAGGATCAAGTCCCG              | GAACAGACTCCGGCGCTA               |
| Osx             | ATGGCGTCCTCTCTGCTTG             | TGAAAGGTCAGCGTATGGCTT            |
| Ppar $\gamma$ 2 | TCGCTGATGCACTGCCTATG            | GAGAGGTCCACAGAGCTGATT            |
| Pref-1          | GACCCACCCTGTGACCCC              | CAGGCAGCTCGTGCACCCC              |
| Pu.1            | CTCCAGGTGTACCCCCAGAGG           | CTCCAGGGCGGGGCTGTC               |
| Rank            | GGACGGTGTTGCAGCAGAT             | GCAGTCTGAGTTCAGTGGTA             |
| Rankl           | CAGCATCGCTCTGTTCTCTGTA          | CTGCGTTTTTCATGGAGTCTCA           |
| Runx2           | AACGATCTGAGATTTGTGGGC           | CCTGCGTGGGATTTCTTGGTT            |
| Smad6           | GCAACCCCTACCACTTCAGC            | GTGGCTTGTACTGGTCAGGAG            |
| Sclerostin      | AGCCTTCAGGAATGATGCCAC           | CTTTGGCGTCATAGGGATGGT            |
| Trap            | CACTCCCACCCTGAGATTTGT           | CATCGTCTGCACGGTTCTG              |

### Supplementary Table S3: Antibody information

| Antibody                   | Company     | Catalog # | Application/Dilution                 |
|----------------------------|-------------|-----------|--------------------------------------|
| $\beta$ -Actin             | Sigma       | A2228     | WB (1:4000)                          |
| Active- $\beta$ -catenin   | Millipore   | 05-665    | WB (1:2000)                          |
| $\beta$ -catenin           | CST         | 9562S     | WB (1:1000), IHC (1:1000)            |
| Kindlin-2                  | Abcam       | Ab74030   | WB (1:1000), IHC (1:700), IF (1:200) |
| Nfact1                     | Santa Cruz  | sc-7294   | WB (1:500), IHC (1:500)              |
| Osx                        | Abcam       | ab22552   | WB (1:1000), IHC (1:2000)            |
| Phalloidin-488             | Invitrogen™ | A12379    | IF (1:200)                           |
| Runx2                      | Abcam       | ab76956   | WB (1:1000)                          |
| Rankl                      | Santa Cruz  | sc-52950  | IHC (1:500)                          |
| Anti-Rankl neutralizing Ab | R&D         | AF462     | 40 ng/ml                             |

|            |       |            |             |
|------------|-------|------------|-------------|
| Sclerostin | Abcam | Ab63097    | IHC (1:200) |
| Sclerostin | Novus | NBP1-50549 | WB (1:500)  |

**Supplementary Table 4. Mutation primers for CRISPR/Cas9 deletion of mouse Kindlin-2.**

|        |                                 |
|--------|---------------------------------|
| K2-sgT | 5'-CACCGCTGCTACGCGGACGGGACGT-3' |
| K2-sgB | 5'-AAACACGTCCCGTCCGCGTAGCAGC-3' |

**Supplementary Table 5: Sequencing primers for CRISPR/Cas9 deletion of mouse Kindlin-2**

|              |                                  |
|--------------|----------------------------------|
| K2 (Forward) | 5'-AGTGACGCTGACGAGAGCCATTTCC-3'  |
| K2 (Reverse) | 5'-GCGCAGCACA CGCCAGGAGCTAGGA-3' |
